# Supplementary material for: Tandem catalysis in domino olefin cross-metathesis/intramolecular oxa-conjugate cyclization: concise synthesis of 2,6-cis-substituted tetrahydropyran derivatives
Source: Royal Society of Chemistry journal article supplement (doi:10.1039/c2ob26189h), 2012-01-01
Supplement: c2ob26189h.pdf [file c2ob26189h.pdf]

*Electronic Supplementary Information for*

**Tandem catalysis in domino olefin cross-metathesis/intramolecular oxa-conjugate cyclization: Concise synthesis of 2,6-*cis*-substituted tetrahydropyran derivatives**

Haruhiko Fuwa,\* Takuma Noguchi, Kenkichi Noto and Makoto Sasaki

*Graduate School of Life Sciences, Tohoku University, 2-1-1 Katahira, Aoba-ku, Sendai 980-8577, Japan*

\*To whom correspondence should be addressed. Email: hfuwa@bios.tohoku.ac.jp

|                                                                      |     |
|----------------------------------------------------------------------|-----|
| General remarks.....                                                 | S2  |
| Preparation of starting materials.....                               | S3  |
| Experimental procedure and spectroscopic data for all compounds..... | S3  |
| Stereochemical assignment of the product tetrahydropyrans.....       | S10 |
| References.....                                                      | S11 |
| Copies of <sup>1</sup> H and <sup>13</sup> C NMR spectra.....        | S12 |

**General remarks.** All reactions sensitive to moisture and/or air were carried out under an atmosphere of argon in dry, freshly distilled solvents under anhydrous conditions using oven-dried glassware unless otherwise noted. Anhydrous dichloromethane ( $\text{CH}_2\text{Cl}_2$ ) was purchased from Kanto Chemical Co. Inc. and used directly without further drying. Anhydrous tetrahydrofuran (THF), diethyl ether ( $\text{Et}_2\text{O}$ ) and toluene were purchased from Wako Pure Chemical Industries, Ltd. and further purified by a Glass Contour solvent purification system under an atmosphere of argon immediately prior to use. Diisopropylamine, triethylamine, 2,6-lutidine, 1,2-dichloroethane and methanol were distilled from calcium hydride under an atmosphere of argon. All other chemicals were purchased at highest commercial grade and used directly. Microwave irradiation experiments were performed on a Biotage Initiator 2.5 system. Analytical thin-layer chromatography (TLC) was performed using E. Merck silica gel 60  $\text{F}_{254}$  plates (0.25-mm thickness). Flash column chromatography was carried out using Kanto Chemical silica gel 60N (40–100 mesh, spherical, neutral) or Fuji Silysia silica gel BW-300 (200–400 mesh). Optical rotations were measured on a JASCO P-1020 digital polarimeter. IR spectra were measured on a JASCO FT/IR-4100 spectrometer.  $^1\text{H}$  and  $^{13}\text{C}$  NMR spectra were recorded on a Varian Unity INOVA-500, INOVA-600, or JEOL JNM ECA-600 spectrometer. Chemical shift values of  $^1\text{H}$  and  $^{13}\text{C}$  NMR spectra are reported in ppm ( $\delta$ ) downfield from tetramethylsilane with reference to internal residual solvent [ $^1\text{H}$  NMR,  $\text{CHCl}_3$  (7.24),  $\text{C}_6\text{HD}_5$  (7.15);  $^{13}\text{C}$  NMR,  $\text{CDCl}_3$  (77.0),  $\text{C}_6\text{D}_6$  (128.0),  $\text{CD}_3\text{CN}$  (1.28)] unless otherwise noted. Coupling constants ( $J$ ) are reported in Hertz (Hz). The following abbreviations were used to designate the multiplicities: s = singlet; d = doublet; t = triplet; q = quartet; m = multiplet; br = broad. Unless otherwise noted, diastereomer ratio (d.r.) was estimated by 500 or 600 MHz  $^1\text{H}$  NMR analysis. ESI-TOF mass spectra were recorded on a Bruker microTOFfocus spectrometer.

## Preparation of starting materials

Compounds **1**<sup>1</sup> and **2–4**<sup>2</sup> were prepared as described previously.

## Experimental procedure and spectroscopic data for all compounds

### General procedure for domino CM/IOCC reaction under “microwave” conditions (GP1)

To a solution of  $\delta$ -hydroxy olefin in  $\text{CH}_2\text{Cl}_2$  placed in a Biotage microwave vial were added  $\alpha,\beta$ -unsaturated carbonyl compound (3–10 equiv) and **HG-II** (10 mol%). The vial was flushed with argon and then sealed. The reaction mixture was heated at 100 °C under microwave irradiation for 30 min. The reaction mixture was cooled to room temperature, directly loaded onto a silica gel column and eluted with an appropriate solvent to give the product tetrahydropyran.

### General procedure for domino CM/IOCC reaction under “oil bath” conditions (GP2)

To a solution of  $\delta$ -hydroxy olefin in toluene were added  $\alpha,\beta$ -unsaturated carbonyl compound (3–10 equiv) and **HG-II** (10 mol%), and the resultant solution was heated at 80–110 °C for 11–24 h. The progress of the reaction was monitored by TLC analysis. The reaction mixture was cooled to room temperature and exposed to air with stirring for a while. The reaction mixture was then concentrated under reduced pressure and the residue purified by flash column chromatography on silica gel to give the product tetrahydropyran.

### General procedure for domino CM/IOCC reaction by using **HG-II** and **CSA** (GP3)

To a solution of  $\delta$ -hydroxy olefin in  $\text{CH}_2\text{Cl}_2$  were added  $\alpha,\beta$ -unsaturated carbonyl compound (3–10 equiv), **HG-II** (10 mol%) and **CSA** (3–10 mol %), and the resultant solution was stirred at 25–35 °C. After completion of the reaction (judged by TLC analysis), the reaction mixture was exposed to air with stirring for a while, directly loaded onto a silica gel column and eluted with an appropriate solvent to give the product tetrahydropyran.

**2-((2R,4S,2R)-6-[2-(*tert*-Butyldiphenylsilyloxy)ethyl]-4-(triisopropylsilyloxy)tetrahydropyran-**

### **2-yl}acetaldehyde (8)**

The *title* compound was synthesized according to **GP1** (19% yield, 2,6-*cis*/2,6-*trans* 5:1), **GP2** (73% yield, 2,6-*cis*/2,6-*trans* 2.4:1) or **GP3** (80% yield, 2,6-*cis*/2,6-*trans* >20:1): Colorless oil;  $[\alpha]_D^{25} +4.1$  (*c* 1.00 in CHCl<sub>3</sub>); IR (film):  $\nu_{\max}/\text{cm}^{-1}$  2942, 2864, 1728, 1463, 1428, 1112, 702; <sup>1</sup>H NMR (600 MHz; CDCl<sub>3</sub>):  $\delta_{\text{H}}$  9.69 (1H, m), 7.65–7.60 (4H, m), 7.42–7.33 (6H, m), 3.87 (1H, m), 3.78–3.67 (3H, m), 3.54 (1H, m), 2.54 (1H, ddd, *J* = 16.0, 7.8, 2.3 Hz), 2.43 (1H, ddd, *J* = 16.0, 4.6, 2.3 Hz), 1.89 (2H, m), 1.76–1.64 (2H, m), 1.29–1.19 (2H, m), 1.05–1.01 (30H, m); <sup>13</sup>C NMR (150 MHz; CDCl<sub>3</sub>):  $\delta_{\text{C}}$  201.3, 135.5 (4C), 133.9 (2C), 129.6 (2C), 127.6 (4C), 72.5, 70.8, 68.4, 60.1, 49.5, 41.7, 41.6, 38.8, 26.8 (3C), 19.2, 18.1 (6C), 12.3 (3C); HRMS (ESI): calcd for C<sub>34</sub>H<sub>54</sub>O<sub>4</sub>Si<sub>2</sub>Na (M + Na)<sup>+</sup>: 605.3453, found 605.3478.

### ***N*-(2-{(2*R*,4*S*,6*R*)-6-[2-(*tert*-Butyldiphenylsilyloxy)ethyl]-4-(triisopropylsilyloxy)tetrahydropyran-2-yl}acetyl) 2,5-dimethyl-1*H*-pyrrole (9)**

The *title* compound was synthesized according to **GP1** (25% yield, 2,6-*cis*/2,6-*trans* 3:1), **GP2** (64% yield, 2,6-*cis*/2,6-*trans* 10:1) or **GP3** (73%, 2,6-*cis*/2,6-*trans* >20:1): Yellow oil;  $[\alpha]_D^{26} +11.7$  (*c* 1.00 in CHCl<sub>3</sub>); IR (film):  $\nu_{\max}/\text{cm}^{-1}$  2928, 1716, 1684, 1541, 1457, 1112, 701, 538; <sup>1</sup>H NMR (600 MHz; CDCl<sub>3</sub>):  $\delta_{\text{H}}$  7.63–7.60 (4H, m), 7.39–7.31 (6H, m), 5.78 (2H, s), 3.91–3.85 (2H, m), 3.75–3.67 (2H, m), 3.51 (1H, m), 3.01 (1H, dd, *J* = 16.1, 6.9 Hz), 2.75 (1H, dd, *J* = 16.1, 5.9 Hz), 2.32 (6H, s), 2.00 (1H, m), 1.88 (1H, m), 1.73 (1H, m), 1.65 (1H, m), 1.25–1.17 (2H, m), 1.06–0.99 (30H, m); <sup>13</sup>C NMR (150 MHz; CDCl<sub>3</sub>):  $\delta_{\text{C}}$  172.3, 135.5 (4C), 134.0, 133.9, 130.2 (2C), 129.5 (2C), 127.6 (4C), 111.2 (2C), 72.7, 72.3, 68.4, 60.4, 45.3, 41.8, 41.6, 38.9, 30.9, 26.8 (3C), 19.2, 18.1 (6C), 16.4, 12.3 (3C); HRMS (ESI): calcd for C<sub>40</sub>H<sub>61</sub>NO<sub>4</sub>Si<sub>2</sub>Na (M + Na)<sup>+</sup>: 698.4031, found 698.4061. The spectroscopic data were in accordance with those previously reported.<sup>2</sup>

### **Methyl (5*R*,7*R*)-9-(*tert*-butyldiphenylsilyloxy)-7-hydroxy-5-(triisopropylsilyloxy)-2-nonenolate (10)**



The *title* compound was synthesized according to **GP1** in 98% yield: Colorless oil;  $[\alpha]_D^{18} -18.0$  (*c* 1.00 in  $\text{CHCl}_3$ ); IR (film):  $\nu_{\text{max}}/\text{cm}^{-1}$  3521, 2943, 2865, 1726, 1110, 701;  $^1\text{H}$  NMR (500 MHz;  $\text{CDCl}_3$ ):  $\delta_{\text{H}}$  7.66–7.63 (4H, m), 7.43–7.35 (6H, m), 6.94 (1H, ddd,  $J = 15.5, 7.0, 7.0$  Hz), 5.85 (1H, d,  $J = 15.5$  Hz), 4.26 (1H, m), 4.16 (1H, m), 3.85–3.76 (2H, m), 3.70 (3H, s), 3.52 (1H, br s), 2.55–2.47 (2H, m), 1.72–1.64 (2H, m), 1.61–1.49 (2H, m), 1.14–0.99 (30H, m, 30H);  $^{13}\text{C}$  NMR (125 MHz;  $\text{CDCl}_3$ ):  $\delta_{\text{C}}$  166.7, 145.1, 135.5 (2C), 135.5 (2C), 133.2, 133.1, 129.7 (2C), 127.7 (4C), 123.3, 69.5, 67.1, 62.6, 51.4, 43.3, 40.3, 39.5, 26.8 (3C), 19.0, 18.1 (3C), 18.1 (3C), 12.6 (3C); HRMS (ESI): calcd for  $\text{C}_{35}\text{H}_{56}\text{O}_5\text{Si}_2\text{Na}$  ( $\text{M} + \text{Na}$ ) $^+$ : 635.3558, found 635.3566.

***rac*-2-{(2*R*,6*S*)-6-[2-(*tert*-Butyldiphenylsilyloxy)ethyl]tetrahydropyran-2-yl}acetaldehyde (11)**

The *title* compound was synthesized according to **GP2** (73% yield, 2,6-*cis*/2,6-*trans* 3:1) or **GP3** (73% yield, 2,6-*cis*/2,6-*trans* >20:1): Colorless oil; IR (film):  $\nu_{\text{max}}/\text{cm}^{-1}$  2932, 2857, 1727, 1428, 1111, 738, 703;  $^1\text{H}$  NMR (600 MHz;  $\text{C}_6\text{D}_6$ ):  $\delta_{\text{H}}$  9.47 (1H, dd,  $J = 3.0, 1.8$  Hz), 7.81–7.77 (4H, m), 7.30–7.23 (6H, m), 3.87 (1H, ddd,  $J = 10.2, 8.4, 5.4$  Hz), 3.75 (1H, ddd,  $J = 10.2, 6.6, 4.8$  Hz), 3.44–3.37 (2H, m), 2.18 (1H, ddd,  $J = 16.2, 7.8, 3.0$  Hz), 1.92 (1H, ddd,  $J = 16.2, 4.8, 1.8$  Hz), 1.75–1.63 (2H, m), 1.46 (1H, m), 1.26–1.12 (12H, m), 0.98 (1H, dddd,  $J = 12.6, 12.6, 11.4, 4.2$  Hz), 0.89 (1H, m);  $^{13}\text{C}$  NMR (150 MHz;  $\text{C}_6\text{D}_6$ ):  $\delta_{\text{C}}$  199.9, 135.96 (2C), 135.94 (2C), 134.31, 134.29, 130.0, 129.9, 128.1 (2C), 128.0 (2C), 74.4, 72.7, 60.6, 50.1, 39.7, 31.5, 31.4, 27.1 (3C), 23.6, 19.4; HRMS (ESI): calcd for  $\text{C}_{25}\text{H}_{34}\text{O}_3\text{SiNa}$  ( $\text{M} + \text{Na}$ ) $^+$ : 433.2169, found 433.2186. The spectroscopic data were in accordance with those previously reported.<sup>2</sup>

**1-{(2*S*,4*S*,4*aR*,8*aS*)-4-Hydroxyoctahydropyrano[3,2-*b*]pyran-2-yl}acetaldehyde (12)**

The *title* compound was synthesized according to **GP2** (60% yield, 2,6-*cis*/2,6-*trans* 6:1) or **GP3** (70% yield, 2,6-*cis*/2,6-*trans* >20:1): Colorless crystals; mp 101–102 °C;  $[\alpha]_D^{24} +21.0$  (*c* 1.00 in  $\text{CHCl}_3$ ); IR (film):  $\nu_{\text{max}}/\text{cm}^{-1}$  3407, 2926, 2856, 1721, 1093, 1046;  $^1\text{H}$  NMR (600 MHz;  $\text{CDCl}_3$ ):  $\delta_{\text{H}}$  9.76 (1H, dd,  $J = 1.8, 1.8$  Hz), 4.00 (1H, m), 3.93 (1H, m), 3.74 (1H, m), 3.37 (1H, m), 3.08 (1H,

ddd,  $J = 11.0, 9.2, 4.6$  Hz), 2.84 (1H, dd,  $J = 9.2, 9.2$  Hz), 2.66 (1H, ddd,  $J = 16.5, 7.8, 2.3$  Hz), 2.50 (1H, ddd,  $J = 16.5, 4.6, 1.4$  Hz), 2.07 (1H, ddd,  $J = 12.8, 5.0, 2.3$  Hz), 2.02 (1H, m), 1.72–1.67 (3H, m), 1.51–1.38 (2H, m);  $^{13}\text{C}$  NMR (150 MHz;  $\text{CDCl}_3$ ):  $\delta_{\text{C}}$  200.3, 83.7, 75.0, 70.6, 70.1, 67.9, 49.0, 38.6, 29.0, 25.4; HRMS (ESI): calcd for  $\text{C}_{10}\text{H}_{16}\text{O}_4\text{Na}$  ( $\text{M} + \text{Na}$ ) $^+$ : 223.0946, found 223.0955.

### **1- $\{(2S,4R,4aR,8aS)\}$ -4-Hydroxyoctahydropyrano[3,2-*b*]pyran-2-yl}acetaldehyde (13)**

The *title* compound was synthesized according to **GP2** (54% yield, 2,6-*cis*/2,6-*trans* 15:1) or **GP3** (48% yield, 2,6-*cis*/2,6-*trans* 4:1). Data for the 15:1 mixture of diastereomers: Brown oil;  $[\alpha]_{\text{D}}^{24} -11.2$  ( $c$  1.00 in  $\text{CHCl}_3$ ); IR (film):  $\nu_{\text{max}}/\text{cm}^{-1}$  3435, 2923, 2869, 1723, 1095, 967;  $^1\text{H}$  NMR (600 MHz;  $\text{CDCl}_3$ ; major isomer):  $\delta_{\text{H}}$  9.75 (1H, dd,  $J = 2.8, 1.8$  Hz), 4.36 (1H, m), 4.09 (1H, d,  $J = 3.2$  Hz), 3.92 (1H, m), 3.61 (1H, ddd,  $J = 11.5, 9.6, 4.6$  Hz), 3.44 (1H, m), 2.51 (1H, ddd,  $J = 16.1, 8.7, 3.2$  Hz), 2.40 (1H, ddd,  $J = 16.1, 4.6, 1.9$  Hz), 2.33 (1H, s), 2.01 (1H, ddd,  $J = 7.8, 4.6, 3.2$  Hz), 1.92 (1H, ddd,  $J = 14.2, 3.2, 2.3$  Hz), 1.73–1.57 (4H, m), 1.40 (1H, m);  $^{13}\text{C}$  NMR (150 MHz;  $\text{CDCl}_3$ ; major isomer):  $\delta_{\text{C}}$  201.0, 79.6, 70.8, 68.2, 67.3, 65.7, 48.9, 37.4, 29.3, 25.5; HRMS (ESI): calcd for  $\text{C}_{10}\text{H}_{16}\text{O}_4\text{Na}$  ( $\text{M} + \text{Na}$ ) $^+$ : 223.0946, found 223.0948.

### ***rac*-N-(2- $\{(2R,6S)\}$ -6-[2-(*tert*-Butyldiphenylsilyloxy)ethyl]tetrahydropyran-2-yl}acetyl)**

#### **2,5-dimethyl-1*H*-pyrrole (14)**

The *title* compound was synthesized according to **GP2** (40% yield, 2,6-*cis*/2,6-*trans* 7:1) or **GP3** (72% yield, 2,6-*cis*/2,6-*trans* >20:1): Yellow oil; IR (film):  $\nu_{\text{max}}/\text{cm}^{-1}$  2930, 1715, 1540, 1364, 1111, 702;  $^1\text{H}$  NMR (600 MHz;  $\text{CDCl}_3$ ):  $\delta_{\text{H}}$  7.66–7.61 (4H, m), 7.41–7.31 (6H, m), 5.80–5.76 (2H, m), 3.89 (1H, m), 3.77–3.66 (2H, m), 3.52 (1H, m), 2.96 (1H, dd,  $J = 16.9, 6.2$  Hz), 2.75 (1H, dd,  $J = 16.9, 6.5$  Hz), 2.34–2.31 (6H, m), 1.81 (1H, m), 1.74–1.51 (5H, m), 1.24–1.11 (2H, m), 1.02 (9H, s);  $^{13}\text{C}$  NMR (150 MHz;  $\text{CDCl}_3$ ):  $\delta_{\text{C}}$  172.6, 135.5 (4C), 134.1, 134.0, 130.3 (2C), 129.5 (2C), 127.5 (4C), 111.3, 111.2, 74.9, 74.6, 60.4, 45.8, 39.4, 31.4 (2C), 26.9 (3C), 23.4, 19.2, 16.5 (2C); HRMS (ESI): calcd for  $\text{C}_{31}\text{H}_{41}\text{NO}_3\text{SiNa}$  ( $\text{M} + \text{Na}$ ) $^+$ : 526.2748, found 526.2760. The spectroscopic data

were in accordance with those previously reported.<sup>2</sup>

***N*-{2-[(2*S*,4*S*,4*aR*,8*aS*)-4-Hydroxyoctahydropyrano[3,2-*b*]pyran-2-yl]acetyl}**

**2,5-dimethyl-1*H*-pyrrole (15)**

The *title* compound was synthesized according to **GP2** (71% yield, 2,6-*cis*/2,6-*trans* 9:1) or **GP3** (63% yield, 2,6-*cis*/2,6-*trans* >20:1): Brown oil;  $[\alpha]_D^{25} -5.8$  (*c* 1.00 in CHCl<sub>3</sub>); IR (film):  $\nu_{\max}/\text{cm}^{-1}$  3735, 1716, 1541, 1507, 1457, 1102, 960; <sup>1</sup>H NMR (600 MHz; CDCl<sub>3</sub>):  $\delta_{\text{H}}$  5.80 (2H, s), 4.12 (1H, m), 3.92 (1H, m), 3.76 (1H, ddd, *J* = 11.0, 8.9, 5.2 Hz), 3.36 (1H, m), 3.14–3.07 (2H, m), 2.85–2.79 (2H, m), 2.36 (6H, s), 2.18 (1H, ddd, *J* = 12.7, 5.2, 2.0 Hz), 2.01 (1H, m), 1.71–1.66 (3H, m), 1.49–1.38 (2H, m); <sup>13</sup>C NMR (150 MHz; CDCl<sub>3</sub>):  $\delta_{\text{C}}$  171.9, 130.3 (2C), 111.5 (2C), 83.8, 74.9, 72.3, 70.2, 67.9, 44.7, 38.5, 29.1, 25.4, 16.6 (2C); HRMS (ESI): calcd for C<sub>16</sub>H<sub>23</sub>NO<sub>4</sub>Na (M + Na)<sup>+</sup>: 316.1519, found 316.1527. The spectroscopic data were in accordance with those previously reported.<sup>2</sup>

***N*-{2-[(2*S*,4*R*,4*aR*,8*aS*)-4-Hydroxyoctahydropyrano[3,2-*b*]pyran-2-yl]acetyl}**

**2,5-dimethyl-1*H*-pyrrole (16)**

The *title* compound was synthesized according to **GP2** (52% yield, 2,6-*cis*/2,6-*trans* >20:1) or **GP3** (56% yield, 2,6-*cis*/2,6-*trans* >20:1): Yellow oil;  $[\alpha]_D^{25} -19.6$  (*c* 1.00 in CHCl<sub>3</sub>); IR (film)  $\nu_{\max}/\text{cm}^{-1}$  3649, 1698, 1653, 1363, 1339, 669; <sup>1</sup>H NMR (600 MHz; CDCl<sub>3</sub>):  $\delta_{\text{H}}$  5.78 (2H, s), 4.44 (1H, m), 4.10 (1H, dd, *J* = 5.8, 3.1 Hz), 3.92 (1H, m), 3.62 (1H, dddd, *J* = 9.6, 5.2, 4.4, 4.1 Hz), 3.44 (1H, ddd, *J* = 11.3, 11.3, 3.4 Hz), 3.03–2.98 (2H, m), 2.76 (1H, dd, *J* = 15.8, 5.2 Hz), 2.36 (6H, s), 2.05–1.97 (2H, m), 1.71–1.58 (3H, m), 1.37 (1H, m); <sup>13</sup>C NMR (150 MHz; CDCl<sub>3</sub>):  $\delta_{\text{C}}$  172.1, 130.2 (2C), 111.2 (2C), 79.8, 70.8, 69.0, 68.2, 65.8, 44.7, 37.4, 29.4, 25.5, 16.4 (2C); HRMS (ESI): calcd for C<sub>16</sub>H<sub>23</sub>NO<sub>4</sub>Na (M + Na)<sup>+</sup>: 316.1519, found 316.1525. The spectroscopic data were in accordance with those previously reported.<sup>2</sup>

**1-{(2*R*,4*S*,6*R*)-6-[2-(*tert*-Butyldiphenylsilyloxy)ethyl]-4-(triisopropylsilyloxy)tetrahydropyran-**

**2-yl}propan-2-one** (18),

**(6R,8R)-10-(tert-Butyldiphenylsilyloxy)-8-hydroxy-6-(triisopropoxy)decan-2-one** (19), and

**(6R)-10-(tert-Butyldiphenylsilyloxy)-6-(triisopropylsilyloxy)-3-decen-2,8-dione** (20)

To a solution of  $\alpha,\beta$ -unsaturated ketone **17** (34.9 mg, 0.0586 mmol) in THF (0.2 mL) was added a solution of RuClH(CO)(PPh<sub>3</sub>)<sub>3</sub> (2.2 mg, 0.0023 mmol) in THF (0.8 mL), and the resultant solution was heated under reflux for 15 h. The reaction mixture was cooled to room temperature and concentrated under reduced pressure. Purification of the residue by flash column chromatography (silica gel, 3 to 10% EtOAc/hexanes, gradient elution) gave **18**<sup>3</sup> (15.8 mg, 45%, 2,6-*cis*/2,6-*trans* 13:1), **20** (3.4 mg, 10%), and a mixture of **19** and **17** (13.2 mg). The yields of **19** and **17** were estimated to be 16% and 22%, respectively, by 600 MHz <sup>1</sup>H NMR analysis of the purified mixture of **19** and **17**. A part of the mixture could be separated by flash column chromatography (silica gel, 3 to 10% EtOAc/hexanes, gradient elution) to obtain an analytically pure sample of **19** (3.3 mg). Data for **18**: Colorless oil;  $[\alpha]_D^{16} +6.9$  (*c* 1.00 in CHCl<sub>3</sub>); IR (film):  $\nu_{\max}/\text{cm}^{-1}$  2942, 2864, 1718, 1418, 1111, 701; <sup>1</sup>H NMR (500 MHz; C<sub>6</sub>D<sub>6</sub>):  $\delta_{\text{H}}$  7.79–7.76 (4H, m), 7.29–7.23 (6H, m), 3.89–3.77 (3H, m), 3.71 (1H, m), 3.50 (1H, m), 2.39 (1H, dd, *J* = 16.0, 7.0 Hz), 2.01 (1H, dd, *J* = 16.0, 5.5 Hz), 2.00–1.90 (2H, m), 1.80 (1H, m), 1.71 (1H, m), 1.70 (3H, s), 1.36 (1H, ddd, *J* = 12.0, 11.5, 11.0 Hz), 1.25 (1H, ddd, *J* = 12.0, 11.5, 11.0 Hz), 1.17 (9H, s), 1.14–1.00 (21H, m); <sup>13</sup>C NMR (125 MHz; C<sub>6</sub>D<sub>6</sub>):  $\delta_{\text{C}}$  204.7, 136.0 (2C), 135.9 (2C), 134.28, 134.25, 129.92, 129.91, 128.1 (2C), 128.0 (2C), 72.5, 72.0, 69.0, 60.8, 49.5, 42.4, 42.2, 39.4, 30.5, 27.1 (3C), 19.4, 18.3 (6C), 12.6 (3C); HRMS (ESI): calcd for C<sub>35</sub>H<sub>56</sub>O<sub>4</sub>Si<sub>2</sub>Na (M + Na)<sup>+</sup>: 619.3609, found 619.3588. The spectroscopic data were in accordance with those previously reported<sup>3</sup>; Data for **19**: Colorless oil;  $[\alpha]_D^{27} -7.4$  (*c* 0.25 in CHCl<sub>3</sub>); IR (film):  $\nu_{\max}/\text{cm}^{-1}$  2942, 2865, 1716, 1428, 1111, 702; <sup>1</sup>H NMR (600 MHz; C<sub>6</sub>D<sub>6</sub>):  $\delta_{\text{H}}$  7.81–7.74 (4H, m), 7.27–7.20 (6H, m), 4.35 (1H, m), 4.20 (1H, ddd, *J* = 10.6, 6.0, 4.6 Hz), 3.94 (1H, m), 3.86 (1H, m), 3.40 (1H, s), 1.97–1.93 (2H, m), 1.78–1.71 (2H, m), 1.67–1.51 (9H, m),

1.18–1.08 (30H, m);  $^{13}\text{C}$  NMR (150 MHz;  $\text{C}_6\text{D}_6$ ):  $\delta_{\text{C}}$  205.9, 136.0 (4C), 134.0, 133.9, 130.0 (2C), 128.1 (4C), 71.2, 66.6, 62.6, 43.2 (2C), 40.6, 36.9, 29.3, 27.0 (3C), 19.7, 19.3, 18.4 (6C), 13.0 (3C); HRMS (ESI): calcd for  $\text{C}_{35}\text{H}_{58}\text{O}_4\text{Si}_2\text{Na}$  ( $\text{M} + \text{Na}$ ) $^+$ : 621.3771, found 621.3762. Data for **20**: Colorless oil;  $[\alpha]_{\text{D}}^{25}$   $-7.1$  ( $c$  0.20 in  $\text{CHCl}_3$ ); IR (film):  $\nu_{\text{max}}/\text{cm}^{-1}$  3408, 2928, 2864, 1715, 1678, 1110, 702;  $^1\text{H}$  NMR (600 MHz;  $\text{CDCl}_3$ ):  $\delta_{\text{H}}$  7.65–7.60 (4H, m), 7.42–7.34 (6H, m), 6.81 (1H, ddd,  $J$  = 16.0, 7.8, 7.8 Hz), 6.10 (1H, d,  $J$  = 16.0 Hz), 4.50 (1H, m), 3.89 (2H, dd,  $J$  = 6.4, 5.9 Hz), 2.72–2.58 (4H, m), 2.50 (1H, m), 2.39 (1H, m), 2.20 (3H, s), 1.08–0.99 (30H, m);  $^{13}\text{C}$  NMR (150 MHz;  $\text{CDCl}_3$ ):  $\delta_{\text{C}}$  207.6, 198.3, 143.9, 135.5 (4C), 133.8, 133.3, 129.7 (2C), 127.7 (5C), 67.3, 59.3, 50.5, 46.7, 40.4, 26.7 (3C), 19.1, 18.1 (6C), 14.1, 12.4 (3C); HRMS (ESI): calcd for  $\text{C}_{35}\text{H}_{54}\text{O}_4\text{Si}_2\text{Na}$  ( $\text{M} + \text{Na}$ ) $^+$ : 617.3458, found 617.3491.

**(6R)-10-(tert-Butyldiphenylsilyloxy)-6-(triisopropylsilyloxy)-decan-2,8-dione (21)**

To a solution of  $\alpha,\beta$ -unsaturated ketone **17** (48.2 mg, 0.0809 mmol) in THF (0.2 mL) was added a solution of  $\text{RuH}_2(\text{CO})(\text{PPh}_3)_3$  (3.0 mg, 0.0033 mmol) in THF (0.8 mL), and the resultant solution was heated under reflux for 13 h. The reaction mixture was cooled to room temperature and concentrated under reduced pressure. Purification of the residue by flash column chromatography (silica gel, 3 to 10% EtOAc/hexanes, gradient elution) gave **18** (26.6 mg, 55%, 2,6-*cis*/2,6-*trans* 15:1), a mixture of **19** and **17** (9.6 mg) and an inseparable mixture of **20** and **21** (11.9 mg). The yields of **19** and **17** were estimated to be 17% and 3%, respectively, by 600 MHz  $^1\text{H}$  NMR analysis of the purified mixture of **19** and **17**. The yields of **20** and **21** were estimated to be 7% and 18%, respectively, by 600 MHz  $^1\text{H}$  NMR analysis of the purified mixture of **20** and **21**. The structure of **21** was deduced from the  $^1\text{H}$  NMR (see page S36) and HRMS spectra of the mixture: HRMS (ESI): calcd for  $\text{C}_{35}\text{H}_{56}\text{O}_4\text{Si}_2\text{Na}$  ( $\text{M} + \text{Na}$ ) $^+$ : 619.3615, found 619.3642.

## Stereochemical assignment of the product tetrahydropyrans

Stereochemical assignment of compounds **9**, **11**, and **14–16** has been reported elsewhere.<sup>2</sup>

Compounds **8**, **12**, and **13**:

Stereochemical assignment of compounds **8**, **12**, and **13** was made by NOE experiments.

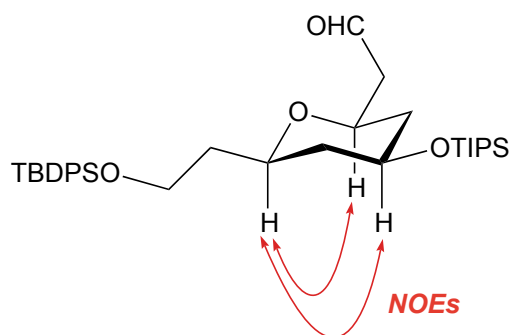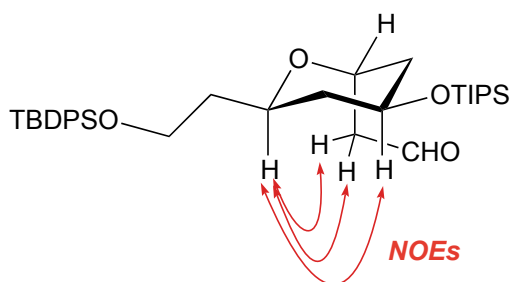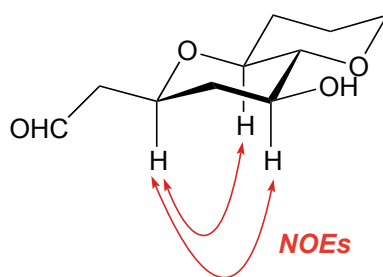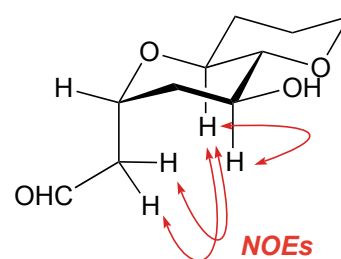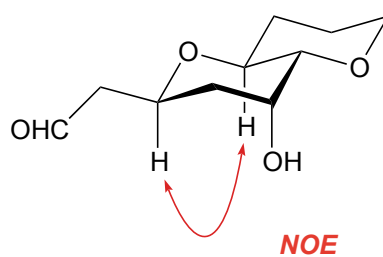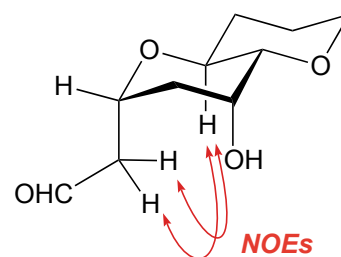

## References

1. (a) H. Fuwa and M. Sasaki, *Org. Lett.*, 2010, **12**, 584; (b) H. Fuwa, T. Suzuki, H. Kubo, T. Yamori and M. Sasaki, *Chem. Eur. J.*, 2011, **17**, 2678.
2. H. Fuwa, N. Ichinokawa, K. Noto and M. Sasaki, *J. Org. Chem.*, 2012, **77**, 2588.
3. H. Fuwa, K. Noto and M. Sasaki, *Org. Lett.*, 2010, **12**, 1636.

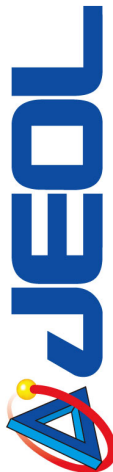

```

File Name      = /Users/HaruhikoFuwa/Docume
Author        = delta
Experiment    = proton.jpg
Sample Id     = TN-HF-26
Solvent       = CHLOROFORM-D
Creation Time = 15-JUN-2012 11:21:06
Revision Time = 18-JUN-2012 16:46:05
Current Time  = 18-JUN-2012 16:46:56

Comment       = single pulse
Data Format   = 1D COMPLEX
Dim Size     = 26214
Dim Title    = Proton
Dim Units    = [ppm]
Dimensions   = X
Site         = ECA600
Spectrometer = DELTAZ_NMR

Field Strength = 14.09636928 [T] (600 [MHz])
X_Acq_Duration = 2.18103808 [s]
X_Domain       = 1H
X_Freq         = 600.1723046 [MHz]
X_Offset       = 5 [ppm]
X_Points       = 32768
X_Prescans     = 1
X_Resolution   = 0.45849727 [Hz]
X_Sweep        = 15.02403846 [kHz]
X_Sweep_Clip   = 12.01923077 [kHz]
Irr_Domain     = Proton
Irr_Freq       = 600.1723046 [MHz]
Irr_Offset     = 5 [ppm]
Tri_Domain     = Proton
Tri_Freq       = 600.1723046 [MHz]
Tri_Offset     = 5 [ppm]
Clipped        = FALSE
Scans          = 8
Total_Scans    = 8

Relaxation_Delay = 2 [s]
Recvr_Gain       = 40
Temp_Get         = 21.2 [dC]
X_90_Width      = 12.2 [us]
X_Acq_Time      = 2.18103808 [s]
X_Angle         = 45 [deg]
X_Atn           = 3 [dB]
X_Pulse         = 6.1 [us]
Irr_Mode        = Off
Tri_Mode        = Off
Dante_Preset    = FALSE
Initial Wait    = 1 [s]
Repetition_Time = 4.18103808 [s]
    
```

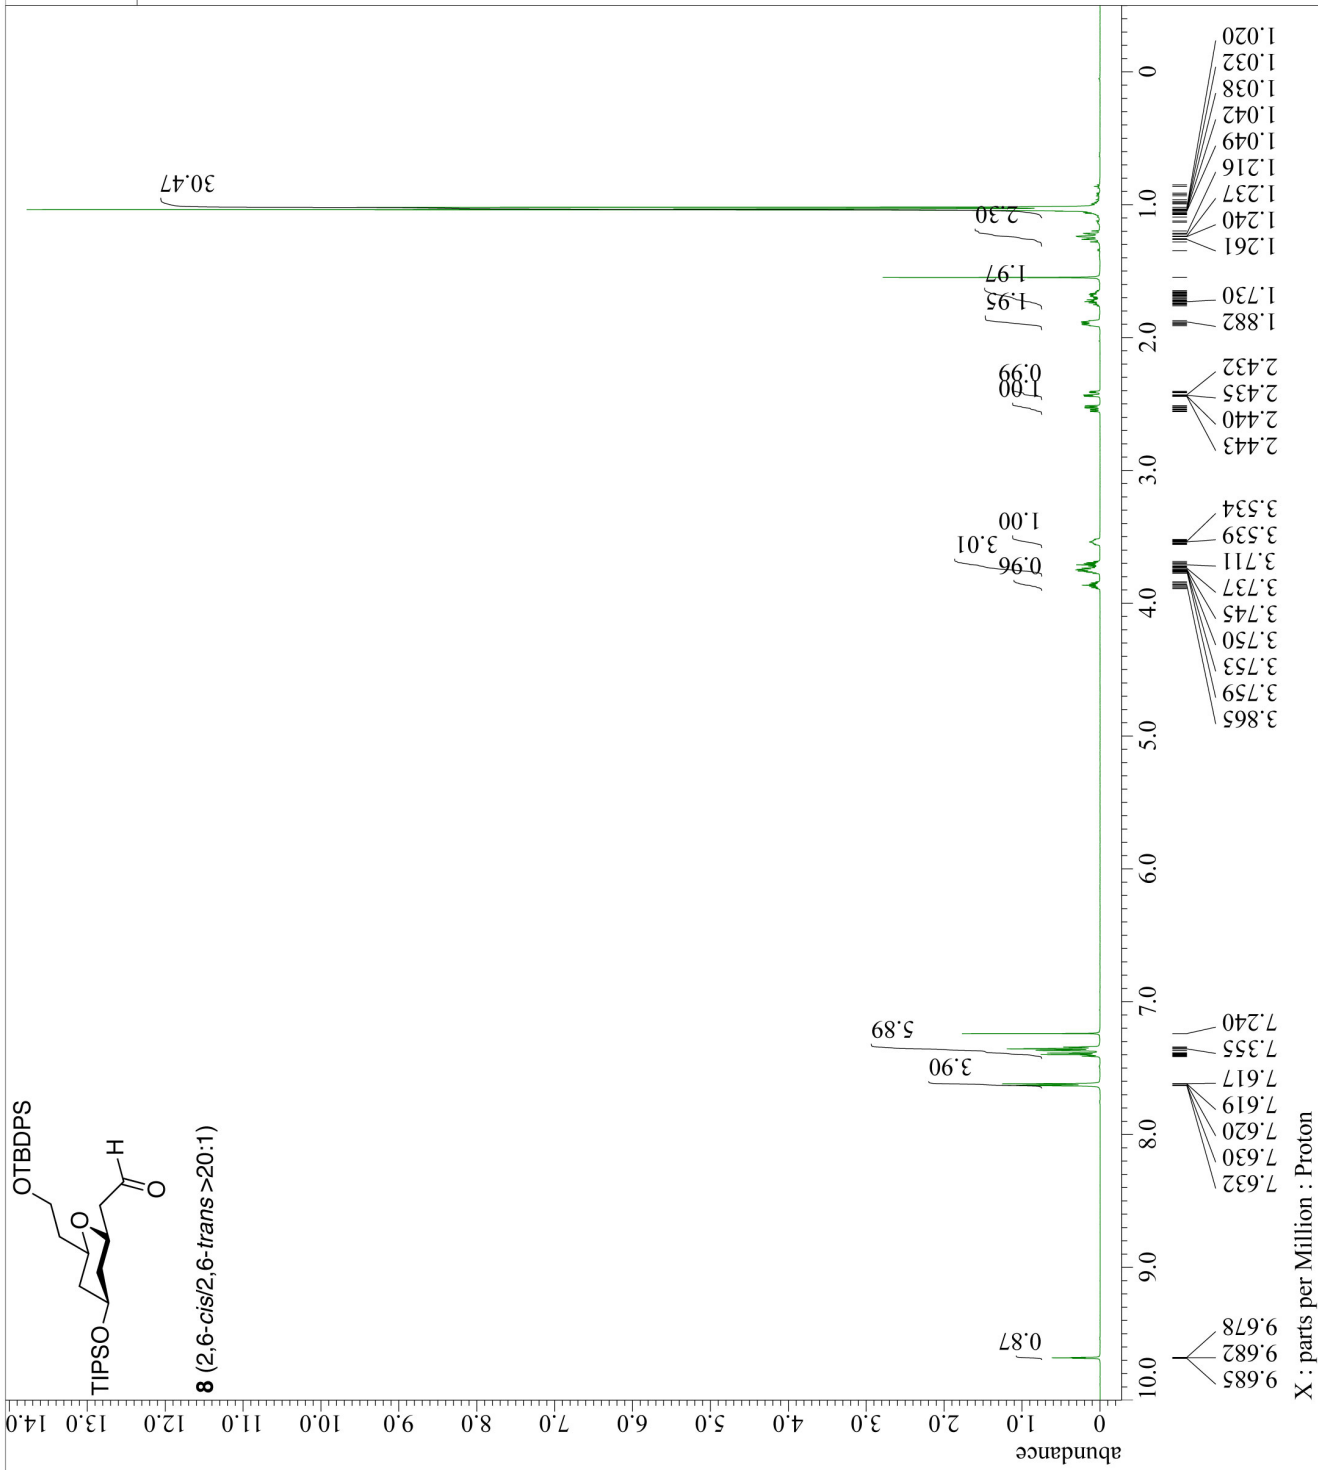

X : parts per Million : Proton





```

File Name      = /Users/HaruhikoFuwa/Docume
Author        = delta
Experiment    = carbon.jxp
Sample Id     = HF-26
Solvent       = CHLOROFORM-D
Creation Time = 15-JUN-2012 10:40:54
Revision Time = 18-JUN-2012 16:49:18
Current_Time  = 18-JUN-2012 16:49:32

Comment       = single pulse decoupled gat
Data Format    = 1D COMPLEX
Dim_Sizes     = 26214
Dim_Title     = Carbon13
Dim_Units     = [ppm]
Dimensions    = X
Site          = ECA600
Spectrometer  = DELTAZ_NMR

Field Strength = 14.09636928 [T] (600 [MHz])
X_Acq_Duration = 0.69206016 [s]
X_Domain       = 13C
X_Freq         = 150.91343039 [MHz]
X_Offset       = 100 [ppm]
X_Points       = 32768
X_Prescans     = 4
X_Resolution   = 1.44496109 [Hz]
X_Sweep        = 47.34848485 [kHz]
X_Sweep_Clip   = 37.87878788 [kHz]
Irr_Domain     = Proton
Irr_Freq       = 600.1723046 [MHz]
Irr_Offset     = 5 [ppm]
Clipped        = FALSE
Scans          = 25
Total_Scans    = 25

Relaxation_Delay = 2 [s]
Recvr_Gain       = 56
Temp_Get         = 21.7 [dC]
X_90_Width       = 9 [us]
X_Acq_Time       = 0.69206016 [s]
X_Angle          = 30 [deg]
X_Atn            = 8 [dB]
X_Pulse          = 3 [us]
Irr_Atn_Dec     = 18 [dB]
Irr_Atn_Noise   = 18 [dB]
Irr_Noise       = WALTZ
Irr_Fwidth      = 76 [us]
Decoupling      = TRUE
Initial_Wait    = 1 [s]
Noe_Time         = TRUE
Repetition_Time = 2.69206016 [s]
    
```

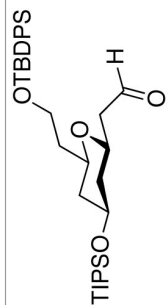

**8** (2,6-cis/2,6-trans>20:1)

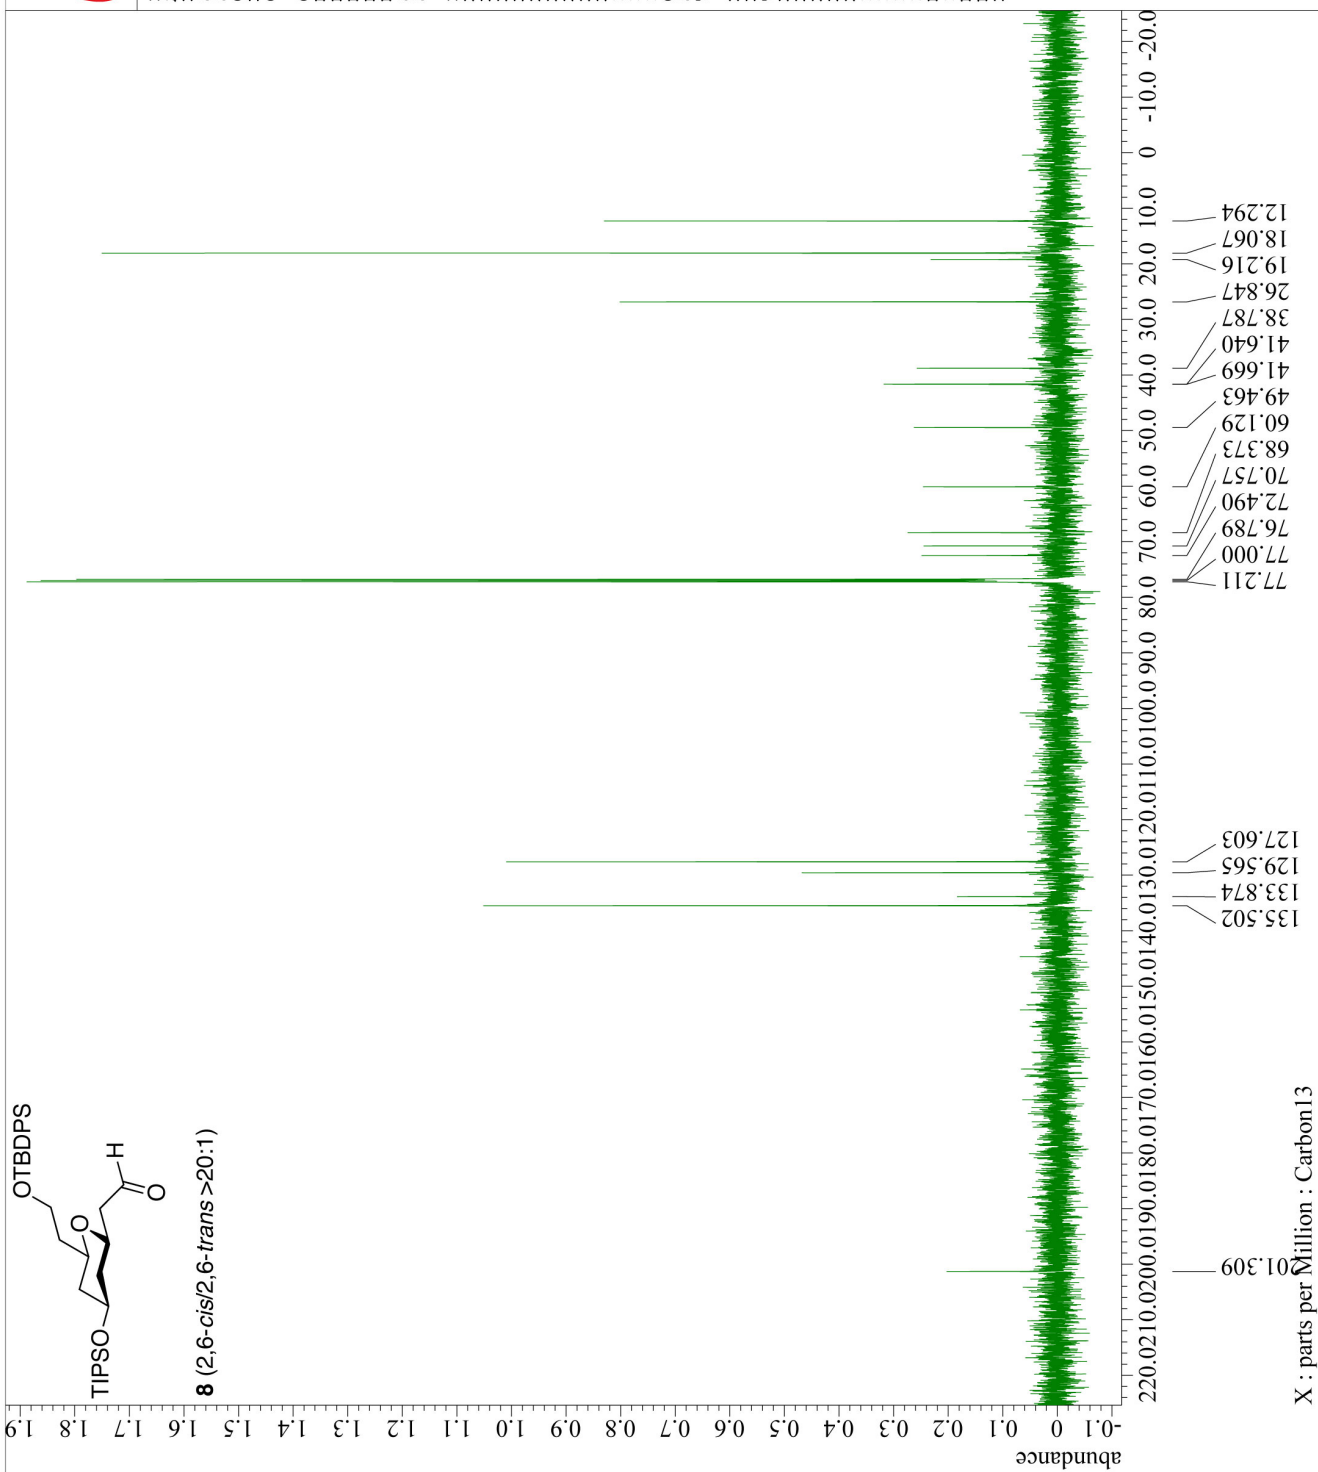



```

File Name      = /Users/HaruhikoFuwa/Docume
Author        = delta
Experiment    = proton.jxp
Sample Id     = TN-I-168a
Solvent       = CHLOROFORM-D
Creation Time = 18-FEB-2012 20:32:08
Revision Time = 13-JUN-2012 14:30:57
Current Time  = 13-JUN-2012 14:31:32

Comment       = single pulse
Data Format   = 1D COMPLEX
Dim Size     = 26214
Dim Title    = Proton
Dim Units    = [ppm]
Dimensions   = X
Site         = ECA600
Spectrometer = DELTAZ_NMR

Field Strength = 14.09636928 [T] (600 [MHz])
X_Acq_Duration = 2.18103808 [s]
X_Domain       = 1H
X_Freq        = 600.1723046 [MHz]
X_Offset      = 5 [ppm]
X_Points      = 32768
X_Prescans    = 1
X_Resolution  = 0.45849727 [Hz]
X_Sweep       = 15.02403846 [kHz]
X_Sweep_Clip  = 12.01923077 [kHz]
Irr_Domain    = Proton
Irr_Freq      = 600.1723046 [MHz]
Irr_Offset    = 5 [ppm]
Tri_Domain    = Proton
Tri_Freq      = 600.1723046 [MHz]
Tri_Offset    = 5 [ppm]
Clipped       = FALSE
Scans         = 8
Total_Scans   = 8

Relaxation_Delay = 2 [s]
Recvr_Gain       = 36
Temp_Get        = 20.3 [dC]
X_90_Width     = 12.2 [us]
X_Acq_Time     = 2.18103808 [s]
X_Angle        = 45 [deg]
X_Atn          = 3 [dB]
X_Pulse        = 6.1 [us]
Irr_Mode       = Off
Tri_Mode       = Off
Dante_Presat   = FALSE
Initial Wait   = 1 [s]
Repetition_Time = 4.18103808 [s]
    
```

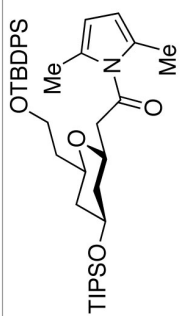

31.54

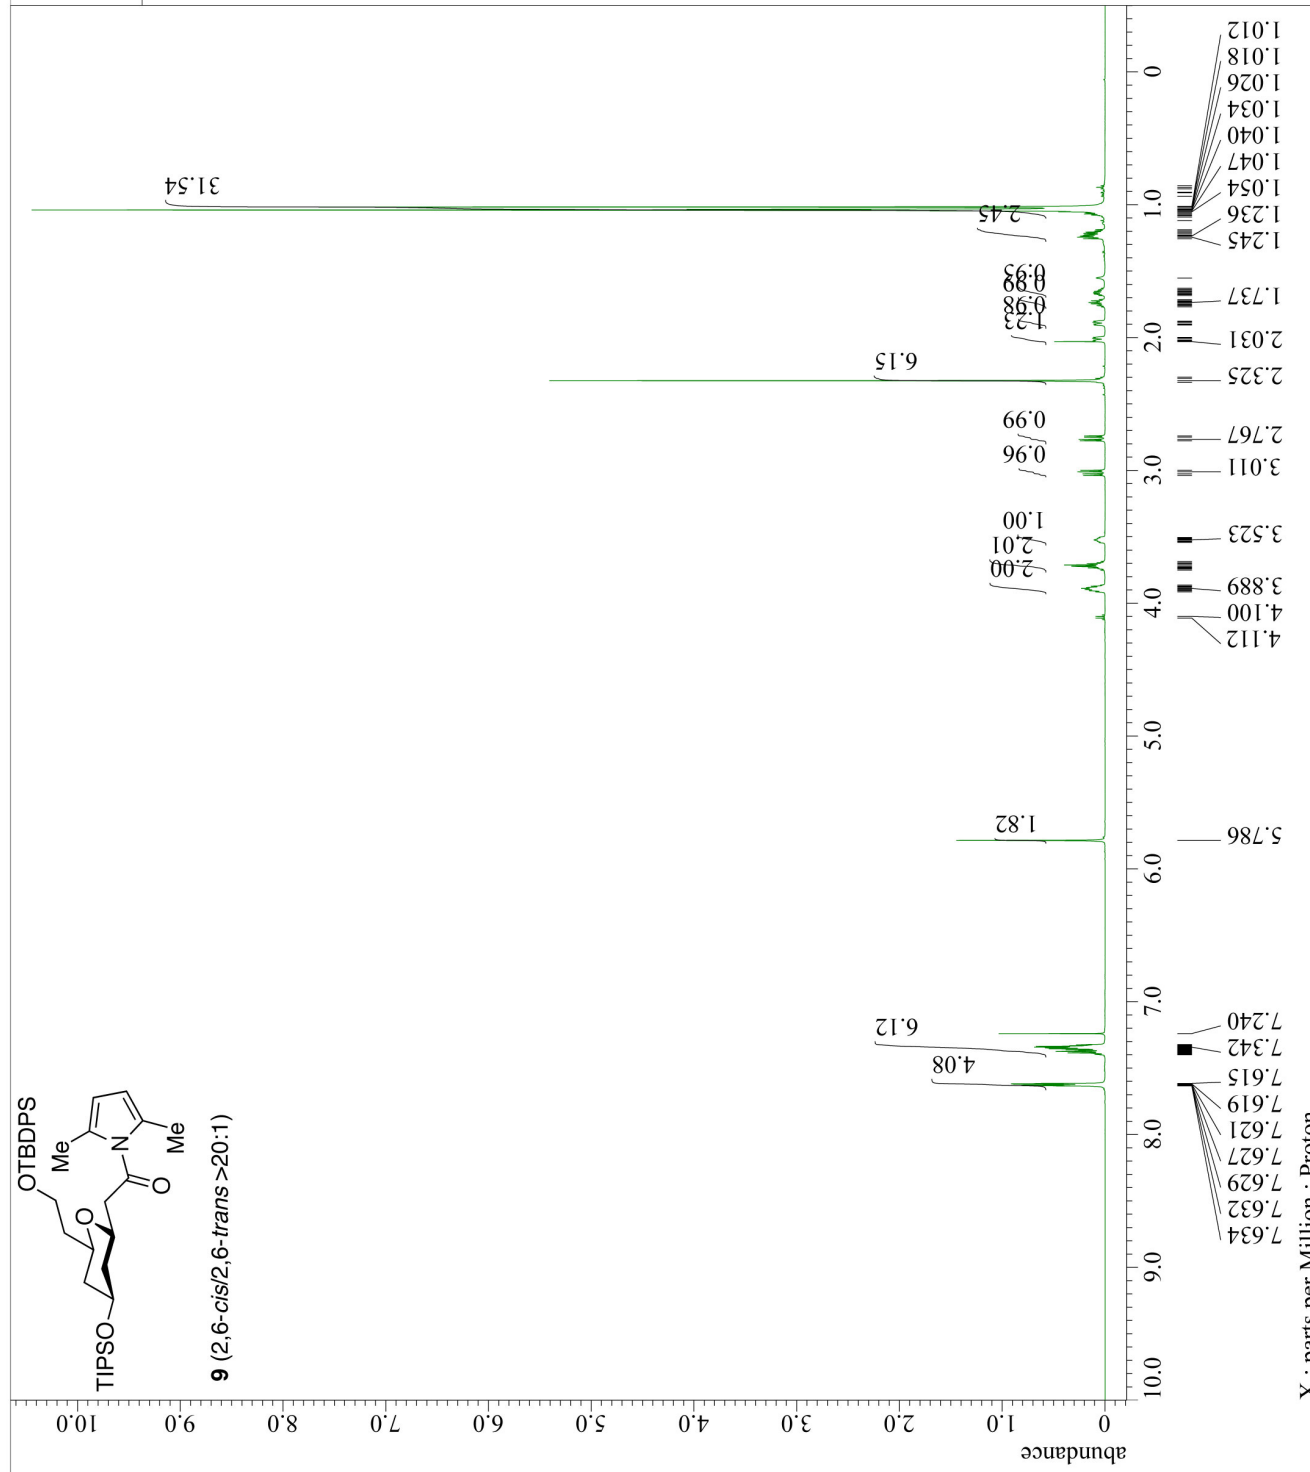

X : parts per Million : Proton



```

File Name      = /Users/HaruhikoFuwa/Docume
Author        = delta
Experiment    = carbon.jxp
Sample Id     = TN-I-168
Solvent       = CHLOROFORM-D
Creation Time  = 1-JUN-2012 16:56:56
Revision Time = 13-JUN-2012 14:32:08
Current_Time  = 13-JUN-2012 14:32:21

Comment       = single pulse decoupled gat
Data Format    = 1D COMPLEX
Dim_Sizes     = 26214
Dim_Title     = Carbon13
Dim_Units     = [ppm]
Dimensions    = X
Site          = ECA600
Spectrometer  = DELTAZ_NMR

Field Strength = 14.09636928 [T] (600 [MHz])
X_Acq_Duration = 0.69206016 [s]
X_Domain       = 13C
X_Freq         = 150.91343039 [MHz]
X_Offset       = 100 [ppm]
X_Points       = 32768
X_Prescans     = 4
X_Resolution   = 1.44496109 [Hz]
X_Sweep        = 47.34848485 [kHz]
X_Sweep_Clip   = 37.87878788 [kHz]
Irr_Domain     = Proton
Irr_Freq       = 600.1723046 [MHz]
Irr_Offset     = 5 [ppm]
Clipped        = FALSE
Scans          = 80
Total_Scans    = 80

Relaxation_Delay = 2 [s]
Recvr_Gain       = 56
Temp_Get         = 22.5 [dC]
X_90_Width      = 9 [us]
X_Acq_Time      = 0.69206016 [s]
X_Angle         = 30 [deg]
X_Atn           = 8 [dB]
X_Pulse         = 3 [us]
Irr_Atn_Dec     = 18 [dB]
Irr_Atn_Noise  = 18 [dB]
Irr_Noise       = WALTZ
Irr_Fwidth      = 76 [us]
Decoupling      = TRUE
Initial_Wait    = 1 [s]
Noe_Time        = TRUE
Repetition_Time = 2 [s]
    
```

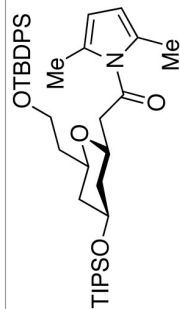

**9** (2,6-cis/2,6-trans >20:1)

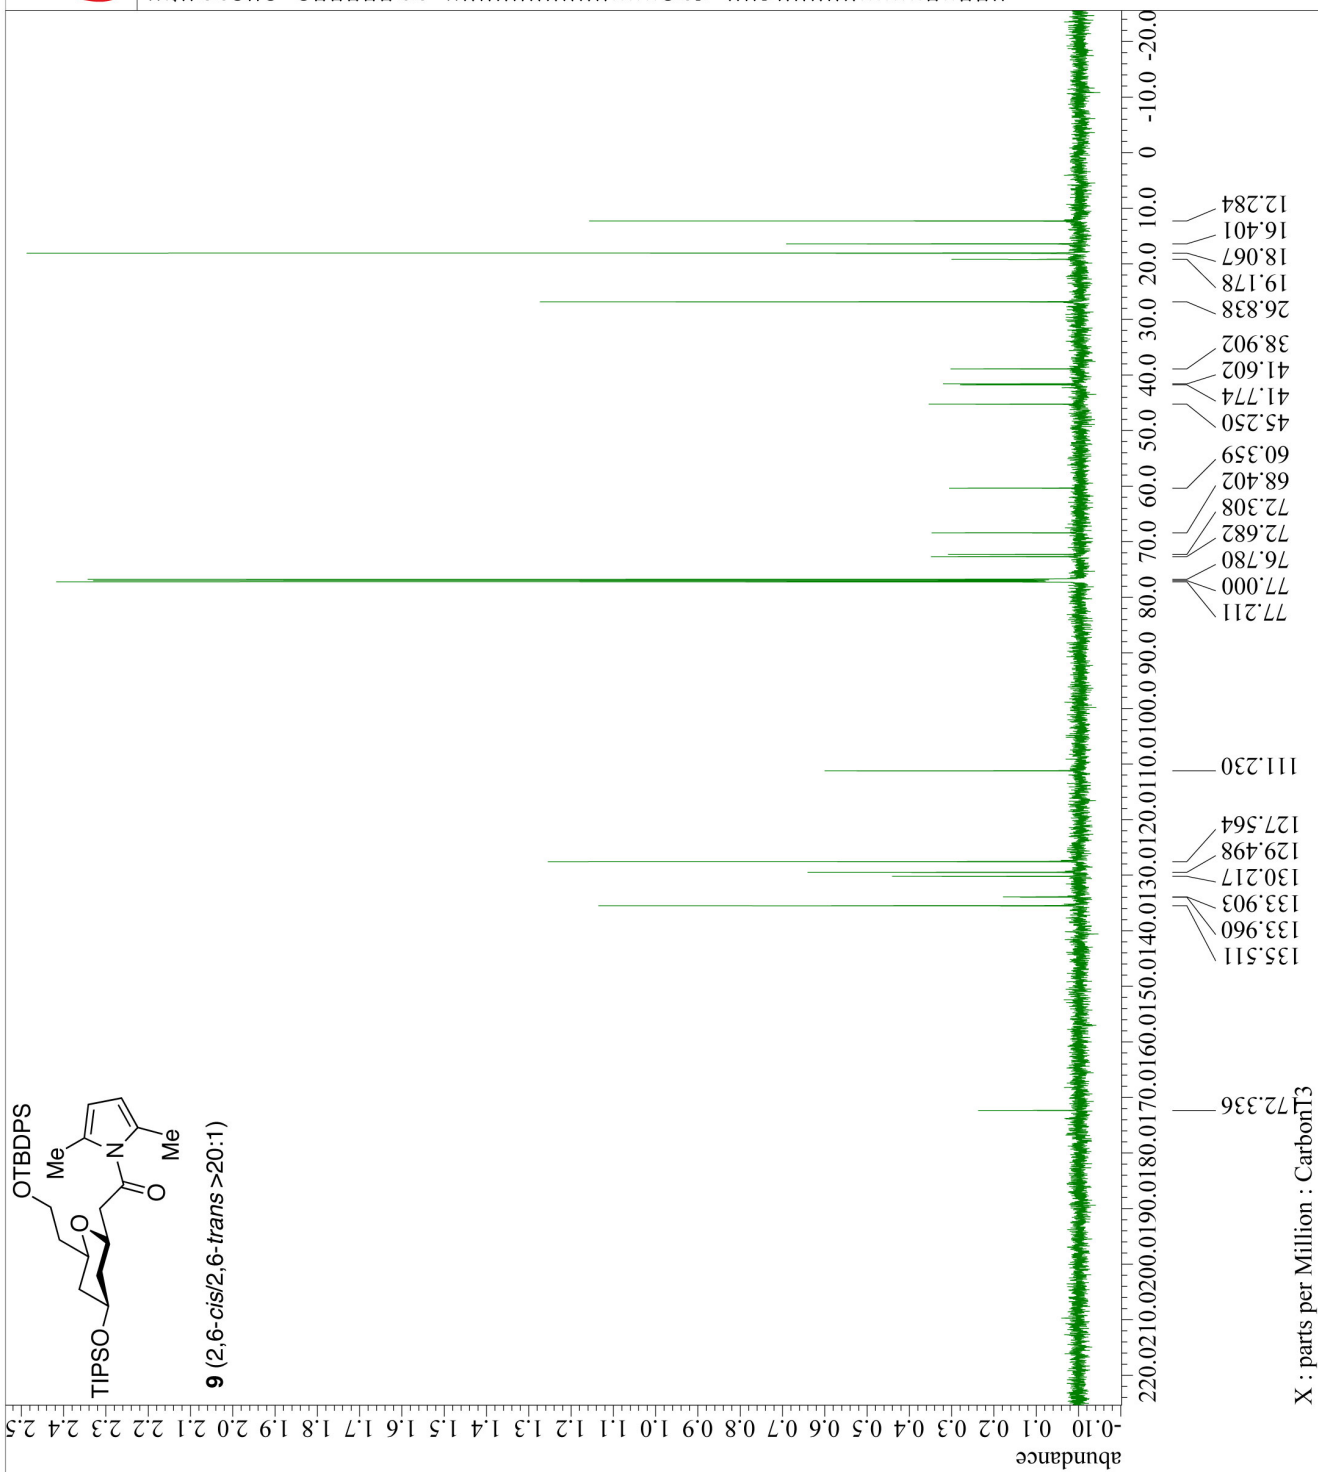

X : parts per Million : Carbon13

KN-I-071 (

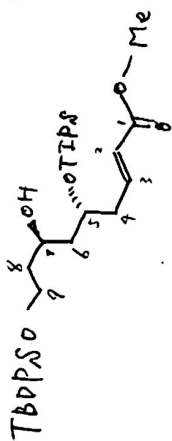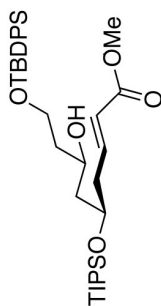

10

STANDARD PROTON PARAMETERS

Pulse Sequence: s2pul

Solvent: CDCl3

Temp. 20.0 C / 293.1 K

INOVA-500 "varian"

Relax. delay 1.000 sec

Pulse 45.0 degrees

Acq. time 1.892 sec

Width 8000.0 Hz

20 repetitions

OBSERVE H1, 499.8593223 MHz

DATA PROCESSING

FT size 32768

Total time 3 min, 5 sec

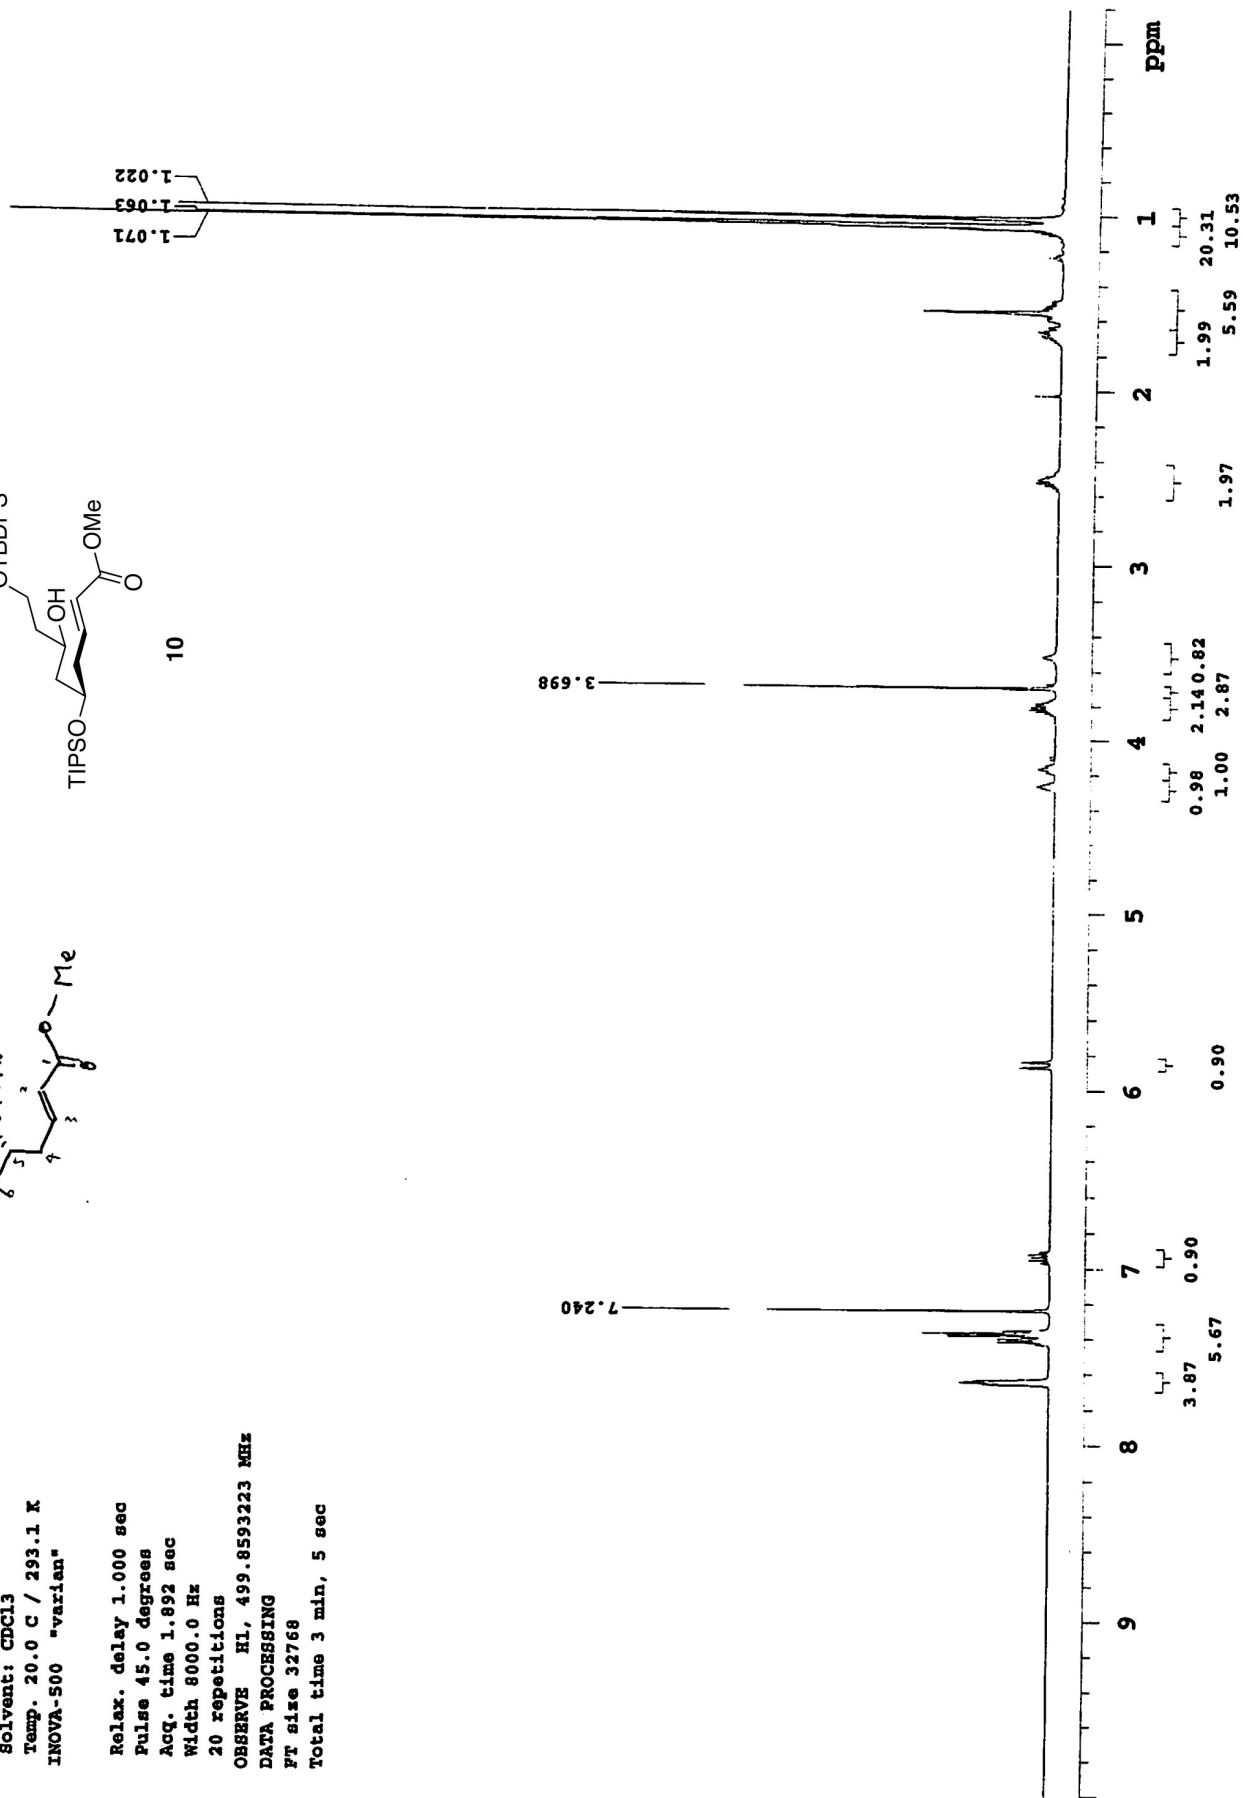

STANDARD CARBON PARAMETERS

Pulse Sequence: s2pul

Solvent: CDCl<sub>3</sub>

Temp. 20.0 C / 293.1 K

User: 1-14-87

INNOVA-500 "varian"

Relax. delay 0.700 sec

Pulse 45.0 degrees

Acq. time 1.298 sec

Width 37735.8 Hz

192 repetitions

OBSERVE C13, 125.6897272 MHz

DECOUPLE H1, 499.8618041 MHz

Power 27 dB

continuously on

WALTZ-16 modulated

DATA PROCESSING

Line broadening 0.5 Hz

FT size 131072

Total time 55 hr, 46 min, 8 sec

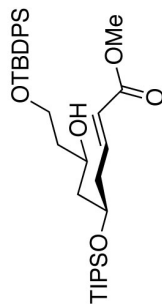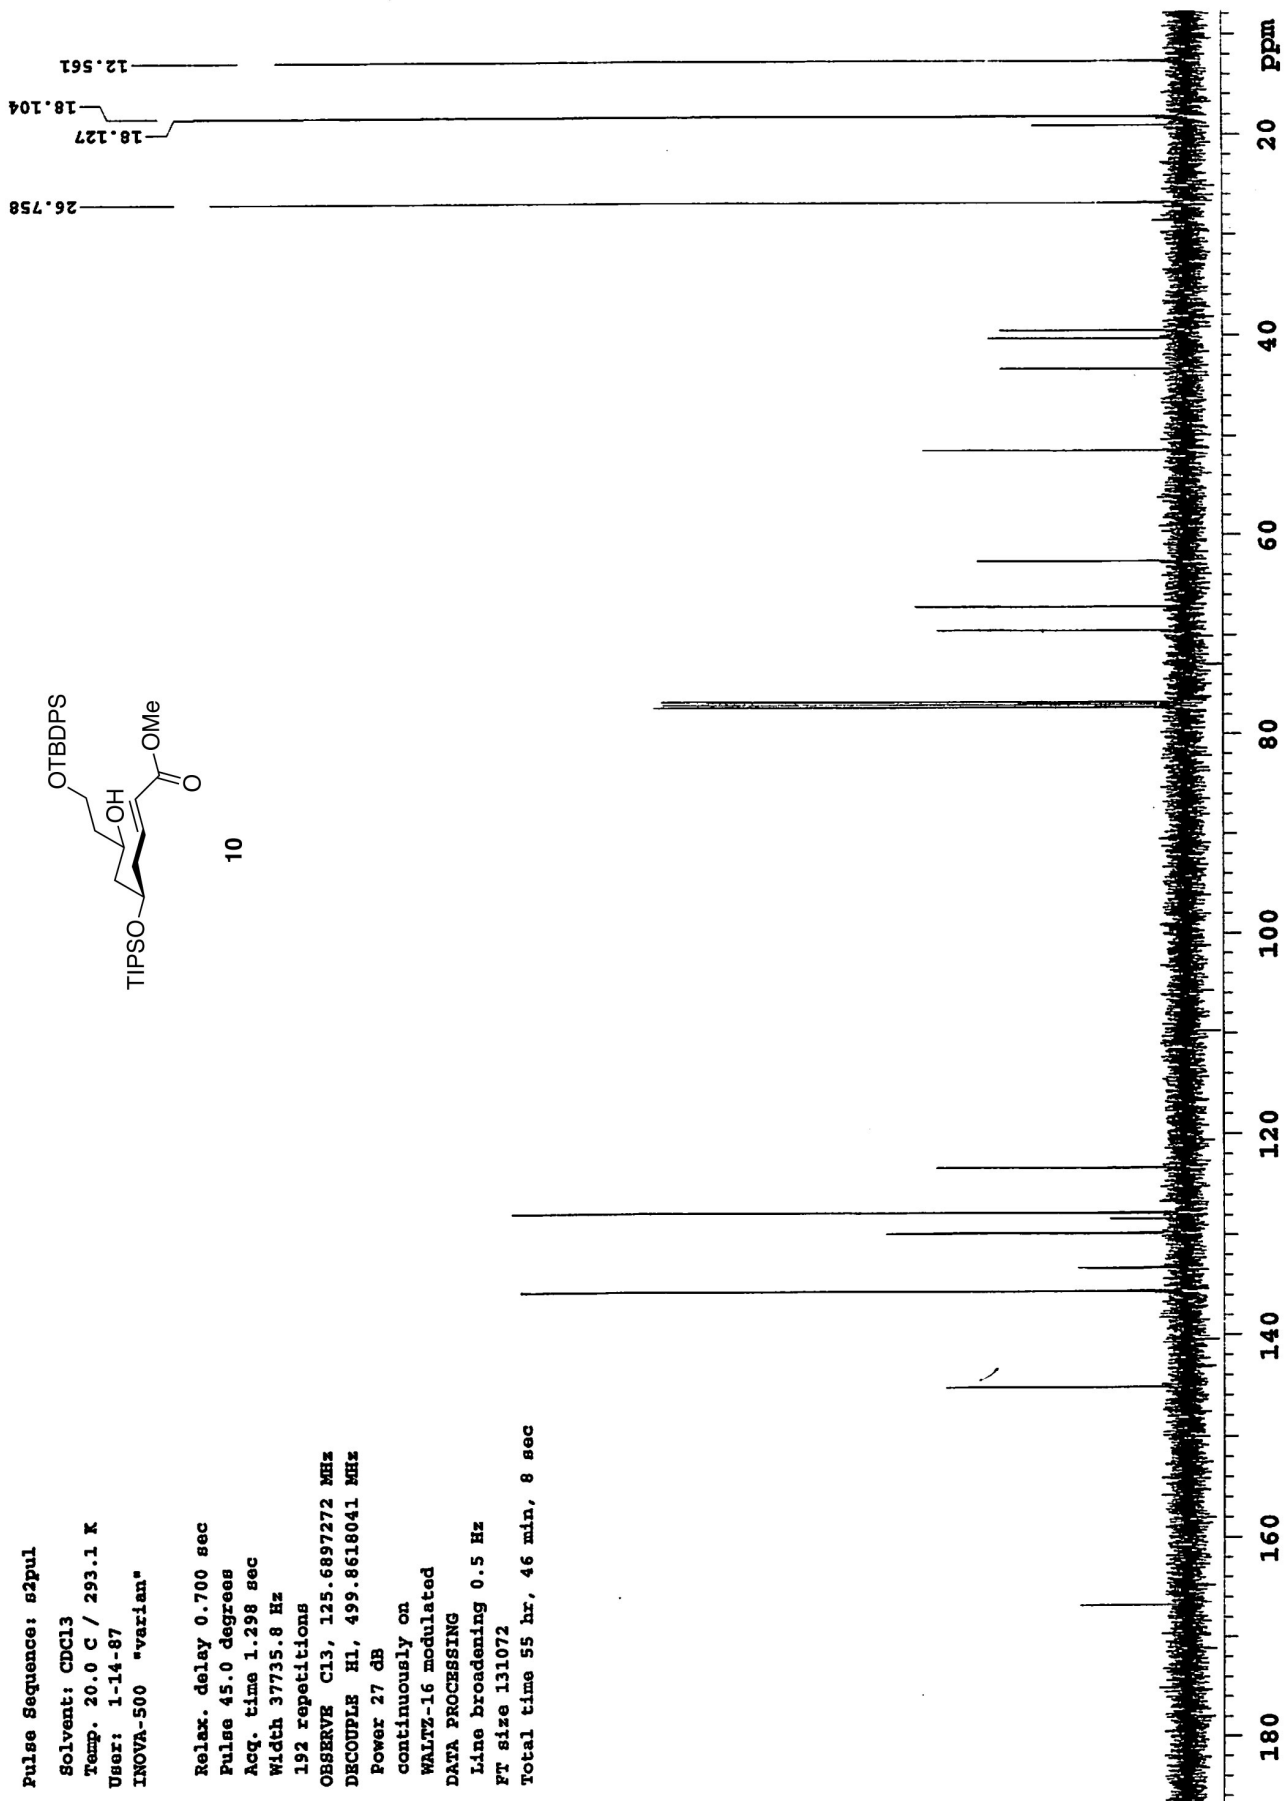

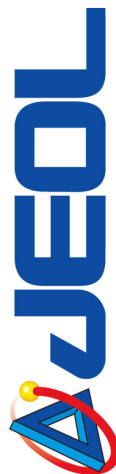

```

File Name      = /Users/HaruhikoFuwa/Docume
Author        = delta
Experiment    = proton.jpg
Sample Id     = TN-I-157
Solvent       = CHLOROFORM-D
Creation Time = 1-JUN-2012 19:00:45
Revision Time = 13-JUN-2012 14:38:30
Current Time  = 13-JUN-2012 14:39:10

Comment       = single pulse
Data Format   = 1D COMPLEX
Dim Size     = 26214
Dim Title    = Proton
Dim Units    = [ppm]
Dimensions   = X
Site         = ECA600
Spectrometer = DELTAZ_NMR

Field Strength = 14.09636928 [T] (600 [MHz])
X_Acq_Duration = 2.18103808 [s]
X_Domain       = 1H
X_Freq         = 600.1723046 [MHz]
X_Offset      = 5 [ppm]
X_Points      = 32768
X_Prescans    = 1
X_Resolution  = 0.45849727 [Hz]
X_Sweep       = 15.02403846 [kHz]
X_Sweep_Clip = 12.01923077 [kHz]
Irr_Domain    = Proton
Irr_Freq      = 600.1723046 [MHz]
Irr_Offset    = 5 [ppm]
Tri_Domain    = Proton
Tri_Freq      = 600.1723046 [MHz]
Tri_Offset    = 5 [ppm]
Clipped       = FALSE
Scans         = 8
Total_Scans  = 8

Relaxation_Delay = 2 [s]
Recvr_Gain       = 30
Temp_Get        = 21.9 [dC]
X_90_Width     = 12.2 [us]
X_Acq_Time     = 2.18103808 [s]
X_Angle        = 45 [deg]
X_Atn          = 3 [dB]
X_Pulse        = 6.1 [us]
Irr_Mode       = Off
Tri_Mode       = Off
Dante_Presat   = FALSE
Initial Wait   = 1 [s]
Repetition_Time = 4.18103808 [s]
    
```

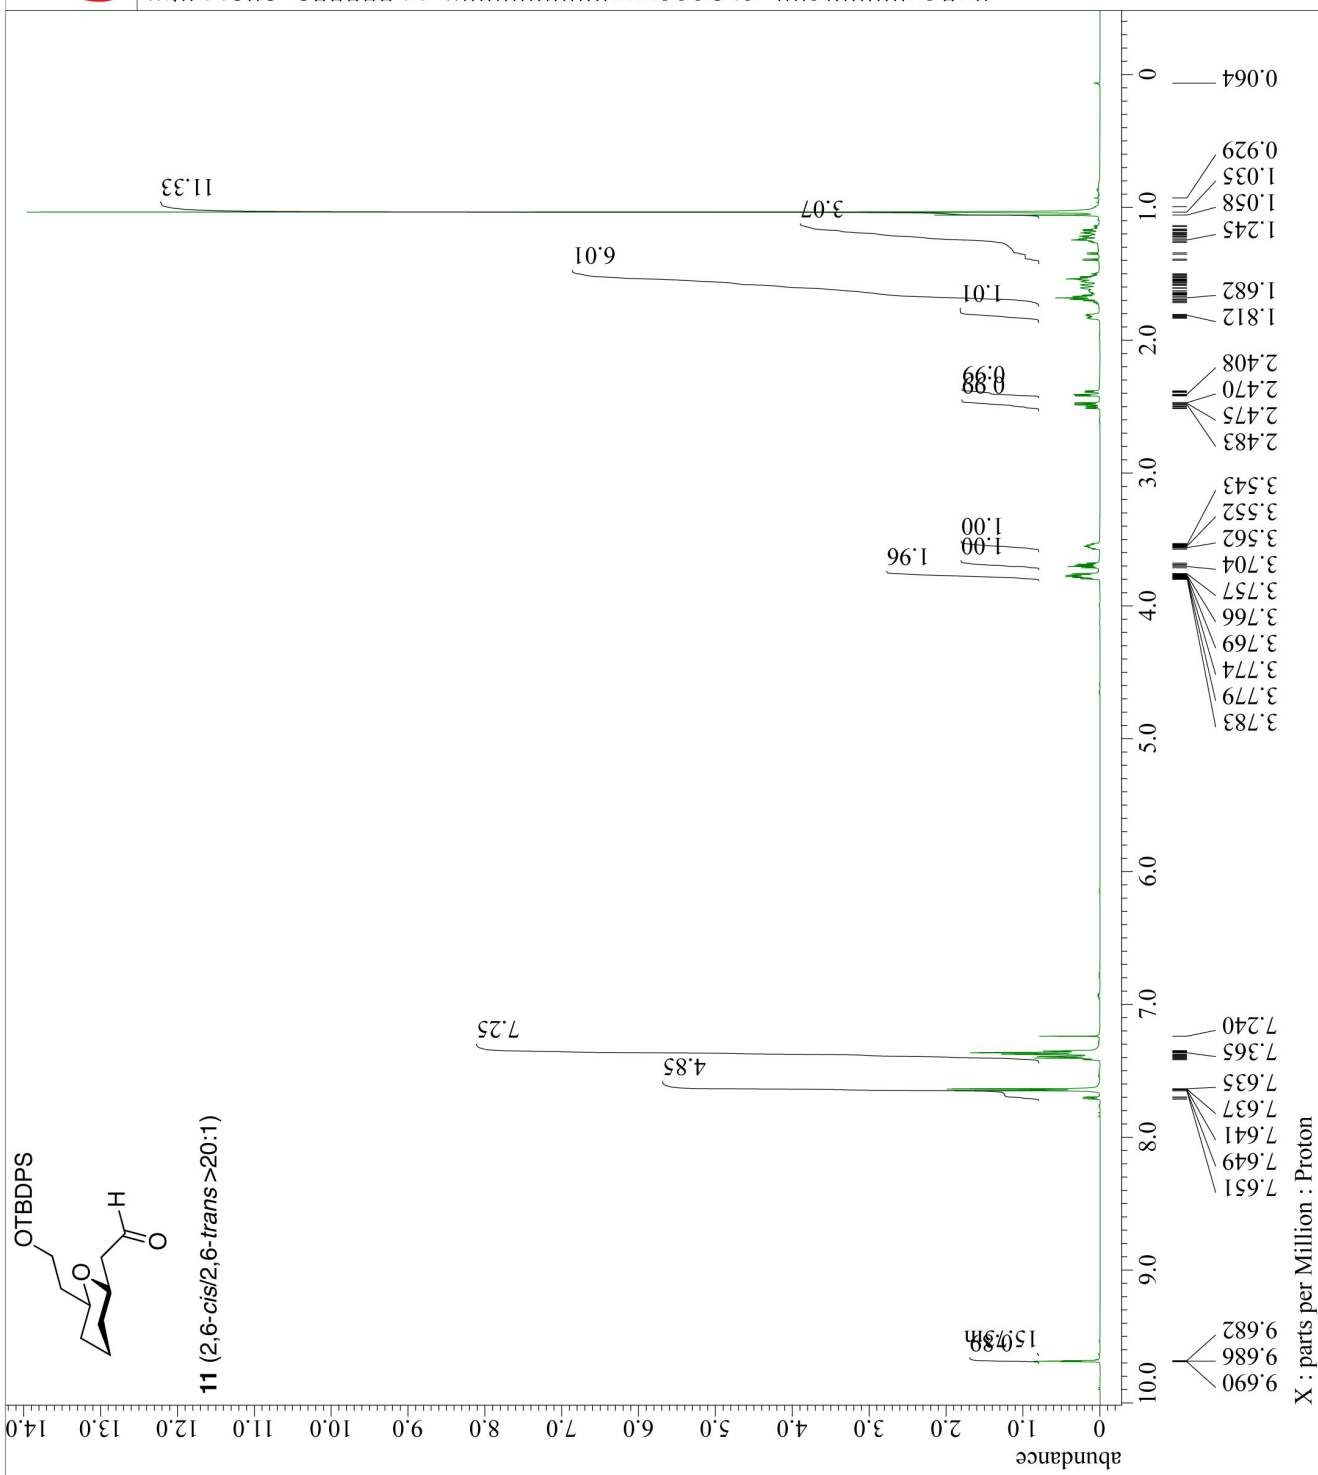

X : parts per Million : Proton



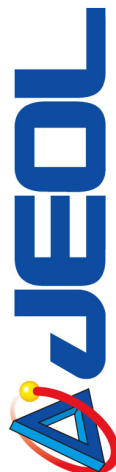

```

File Name      = /Users/HaruhikoFuwa/Docume
Author        = delta
Experiment    = carbon.jpg
Sample Id     = TN-I-157
Solvent       = CHLOROFORM-D
Creation Time = 1-JUN-2012 19:03:31
Revision Time = 13-JUN-2012 14:39:43
Current_Time  = 13-JUN-2012 14:39:56

Comment       = single pulse decoupled gat
Data Format    = 1D COMPLEX
Dim Size      = 26214
Dim Title     = Carbon13
Dim Units     = [ppm]
Dimensions    = X
Site          = ECA600
Spectrometer  = DELTAZ_NMR

Field Strength = 14.09636928 [T] (600 [MHz])
X_Acq_Duration = 0.69206016 [s]
X_Domain       = 13C
X_Freq         = 150.91343039 [MHz]
X_Offset       = 100 [ppm]
X_Points       = 32768
X_Prescans    = 4
X_Resolution  = 1.44496109 [Hz]
X_Sweep       = 47.34848485 [kHz]
X_Sweep_Clip = 37.87878788 [kHz]
Irr_Domain    = Proton
Irr_Freq      = 600.1723046 [MHz]
Irr_Offset    = 5 [ppm]
Clipped       = FALSE
Scans         = 32
Total_Scans   = 32

Relaxation_Delay = 2 [s]
Recvr_Gain       = 54
Temp_Get         = 22.2 [dC]
X_90_Width      = 9 [us]
X_Acq_Time      = 0.69206016 [s]
X_Angle         = 30 [deg]
X_Atn           = 8 [dB]
X_Pulse         = 3 [us]
Irr_Atn_Dec     = 18 [dB]
Irr_Atn_Noise  = 18 [dB]
Irr_Noise       = WAITZ
Irr_Fwidth     = 76 [us]
Decoupling      = TRUE
Initial_Wait    = 1 [s]
Noe_Time        = TRUE
Repetition_Time = 2.69206016 [s]
    
```

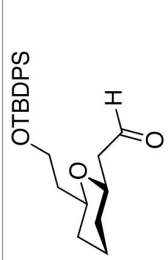

**11** (2,6-cis/2,6-trans >20:1)

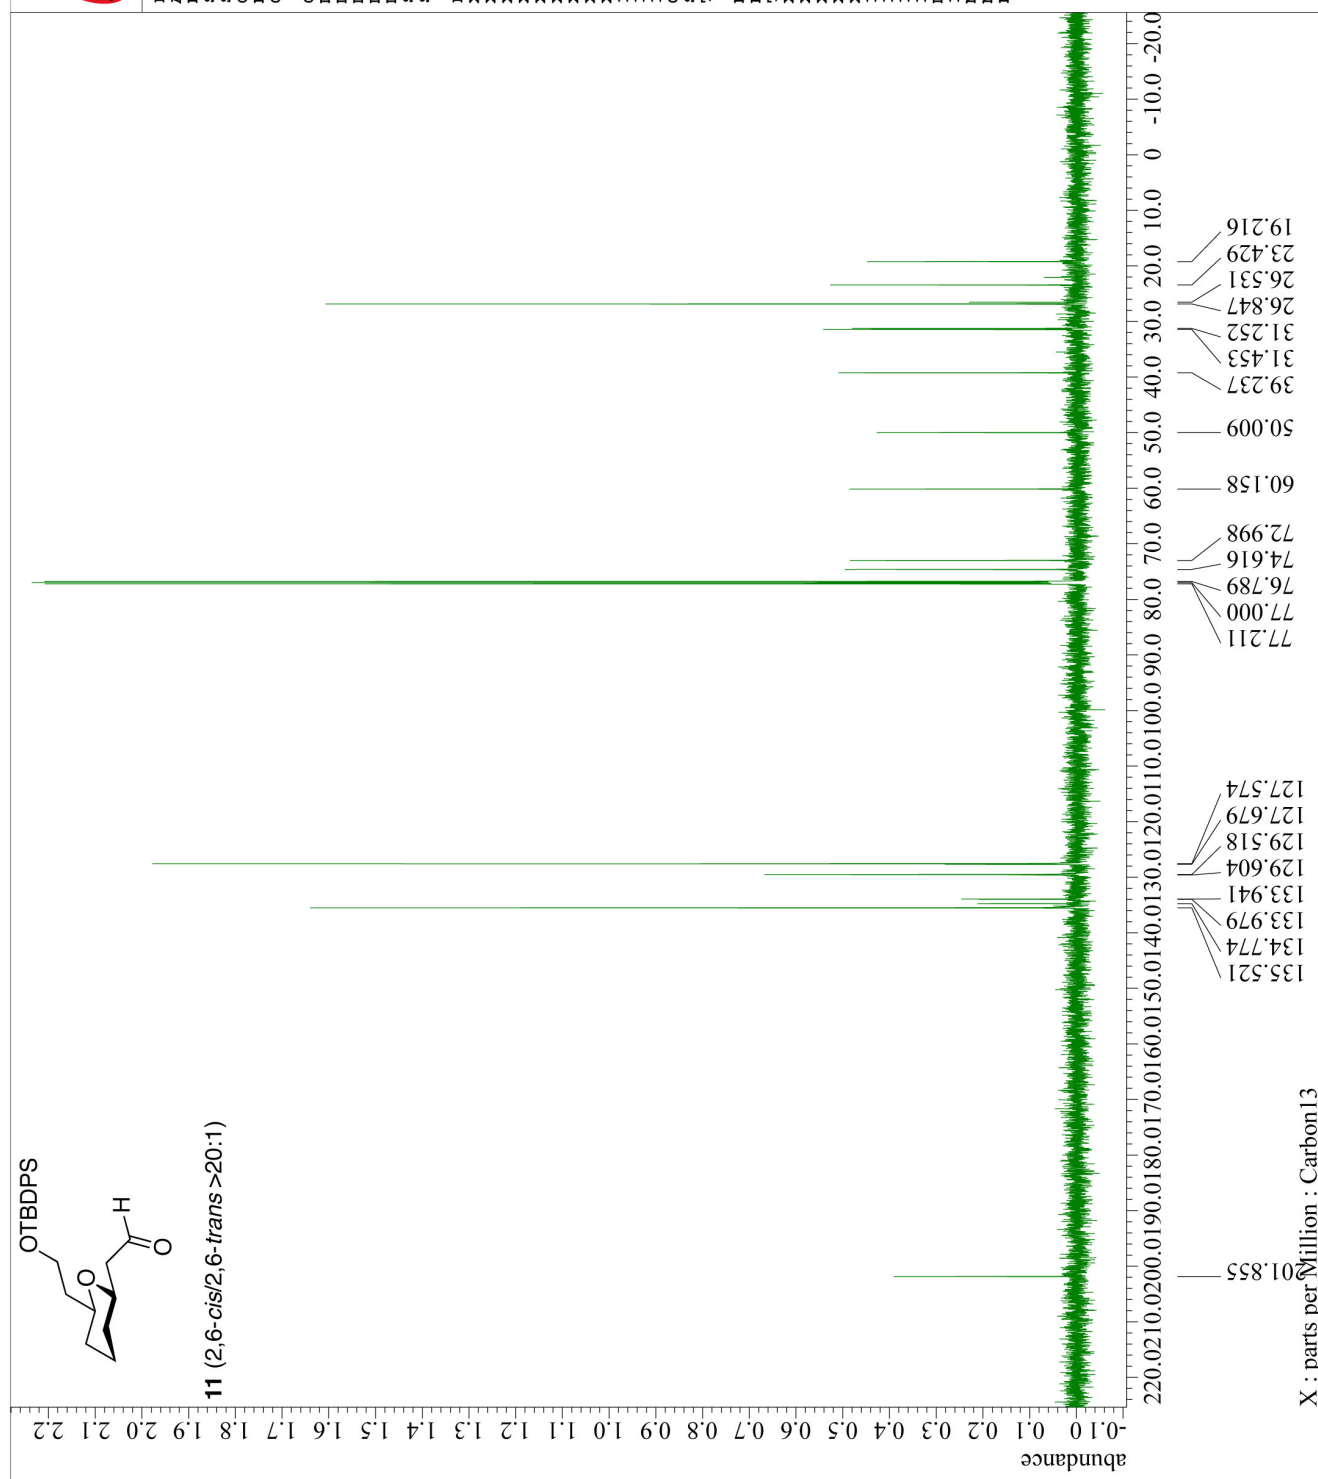

X : parts per Million : Carbon13



```

/Users/HaruhikoFuwa/Docume
= delta
= proton.jpg
= TN-I-175
= CHLOROFORM-D
= 10-MAY-2012 11:00:41
= 13-JUN-2012 14:46:33
= 13-JUN-2012 14:47:32
= single pulse
= 1D COMPLEX
= 26214
= Proton
= [ppm]
= X
= ECA600
= DELTA2_NMR
Spectrometer
Field Strength = 14.09636928 [T] (600 [MHz])
X_Acq_Duration = 2.18103808 [s]
X_Domain = 1H
X_Freq = 600.1723046 [MHz]
X_Offset = 5 [ppm]
X_Points = 32768
X_Prescans = 1
X_Resolution = 0.45849727 [Hz]
X_Sweep = 15.02403846 [kHz]
X_Sweep_Clippped = 12.01923077 [kHz]
Irr_Domain = Proton
Irr_Freq = 600.1723046 [MHz]
Irr_Offset = 5 [ppm]
Tri_Domain = proton
Tri_Freq = 600.1723046 [MHz]
Tri_Offset = 5 [ppm]
Clipped = FALSE
Scans = 8
Total_Scans = 8
Relaxation_Delay = 2 [s]
Recvr_Gain = 46
Temp_Get = 21 [dC]
X_90_Width = 12.2 [us]
X_Acq_Time = 2.18103808 [s]
X_Angle = 45 [deg]
X_Atn = 3 [dB]
X_Pulse = 6.1 [us]
Irr_Mode = Off
Tri_Mode = Off
Dante_Presat = FALSE
Initial_Wait = 1 [s]
Repetition_Time = 4.18103808 [s]
    
```

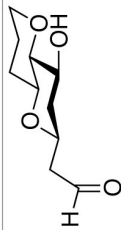

12 (2,6-cis/2,6-trans >20:1)

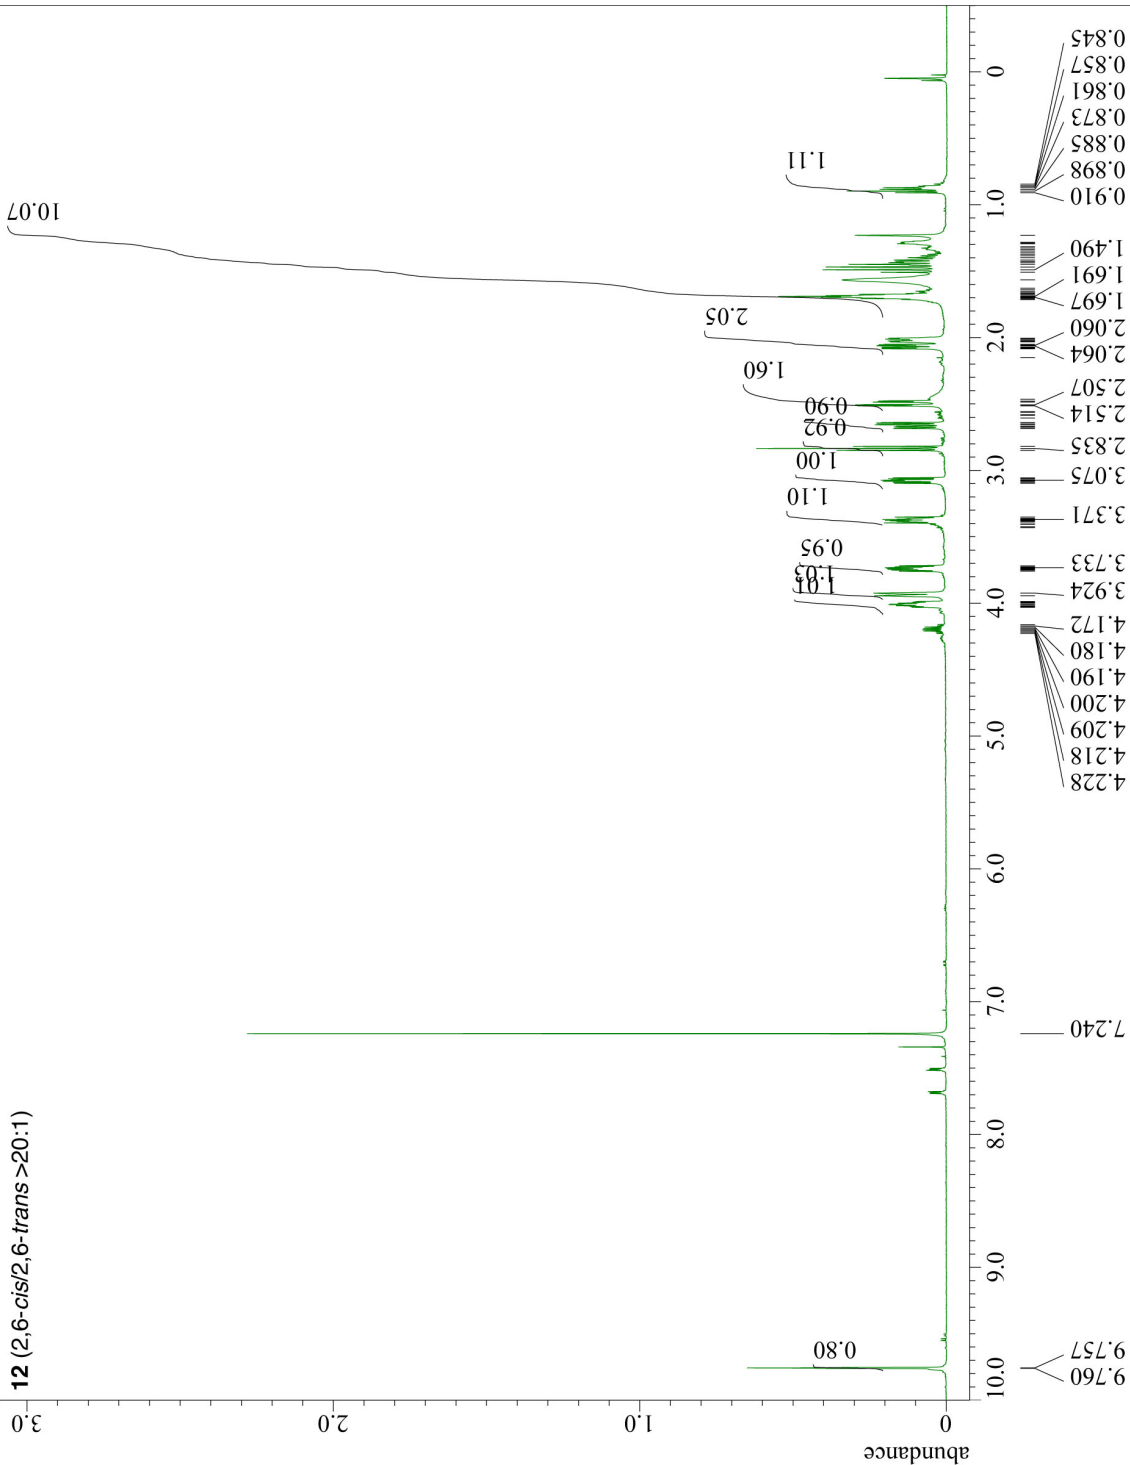

X : parts per Million : Proton



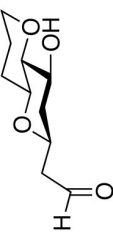

12 (2,6-cis/2,6-trans >20:1)

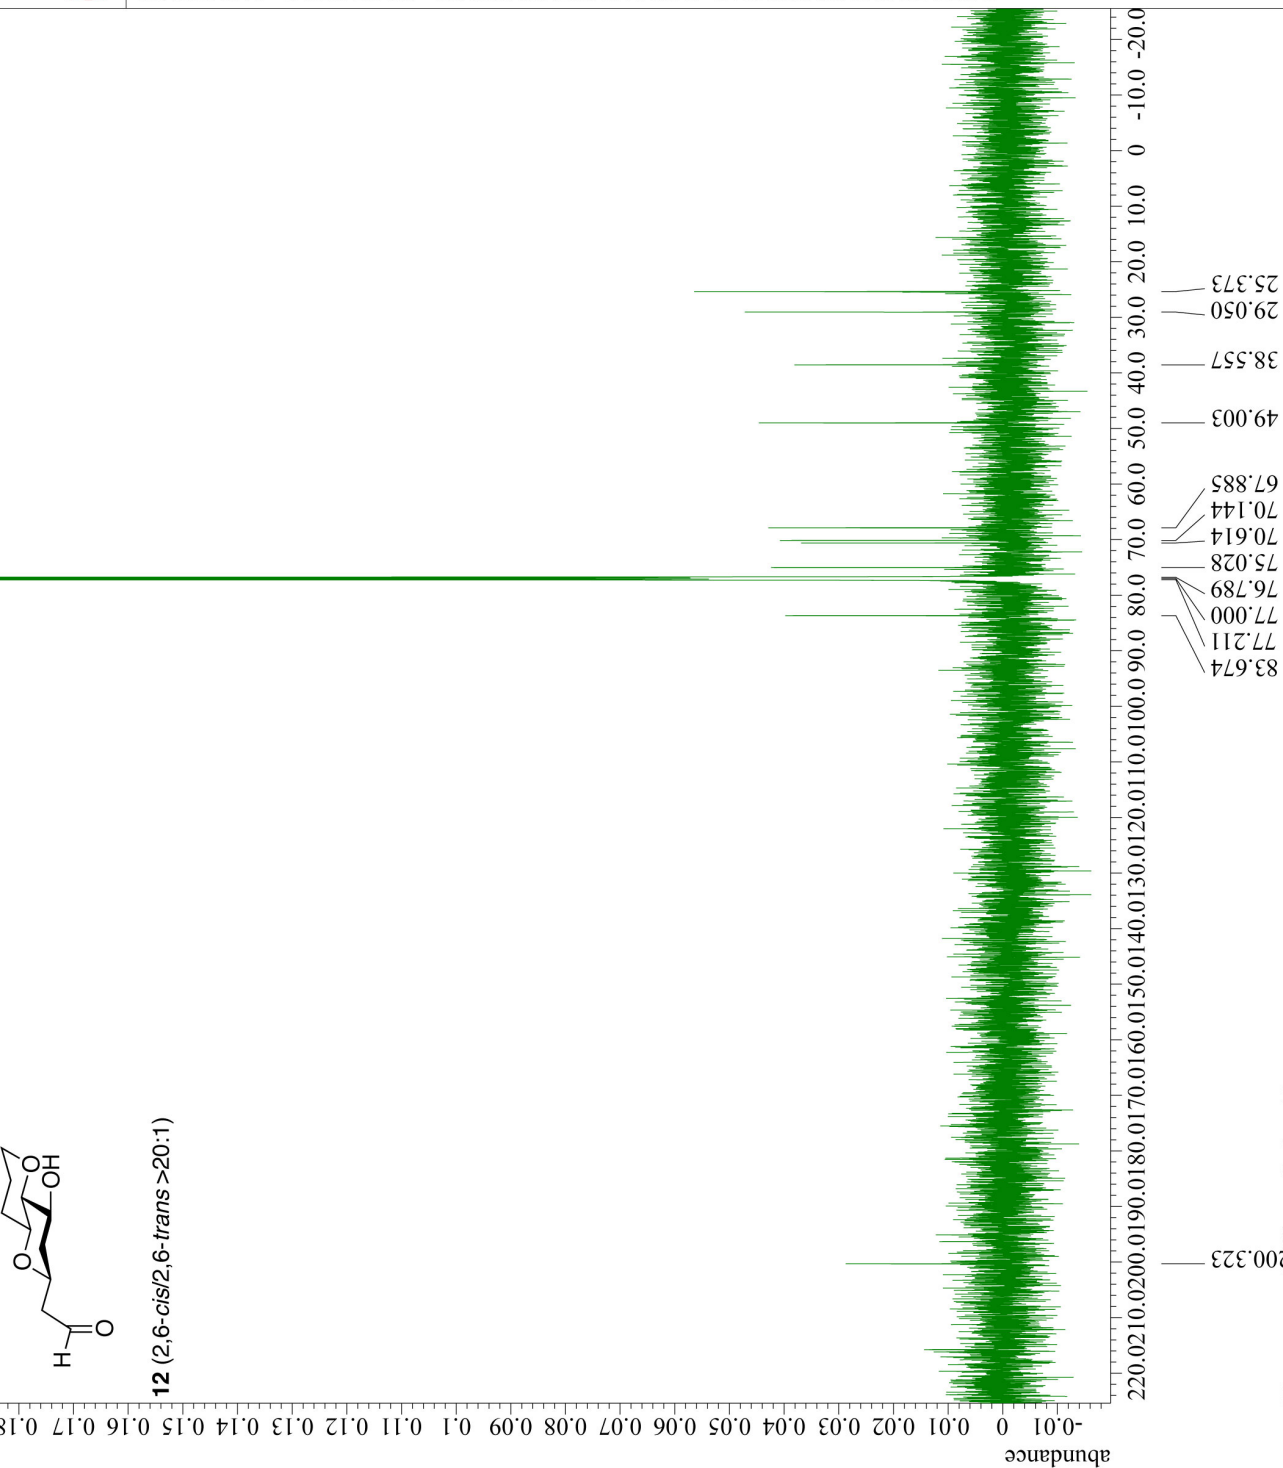

X : parts per Million : Carbon13

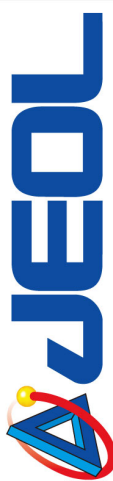

```

File Name      = /Users/HaruhikoFuwa/Docume
Author        = delta
Experiment    = carbon.jxp
Sample Id     = TN-I-175
Solvent       = CHLOROFORM-D
Creation Time = 5-APR-2012 20:41:30
Revision Time = 13-JUN-2012 14:48:19
Current Time  = 13-JUN-2012 14:48:34

Comment       = single pulse decoupled gat
Data Format   = 1D COMPLEX
Dim Size     = 26214
Dim Title    = Carbon13
Dim Units    = [ppm]
Dimensions   = X
Site         = ECA600
Spectrometer = DELTAZ_NMR

Field Strength = 14.09636928 [T] (600 [MHz])
X_Acq_Duration = 0.69206016 [s]
X_Domain       = 13C
X_Freq         = 150.91343039 [MHz]
X_Offset       = 100 [ppm]
X_Points       = 32768
X_Prescans    = 4
X_Resolution  = 1.44496109 [Hz]
X_Sweep        = 47.34848485 [kHz]
X_Sweep_Clip   = 37.87878788 [kHz]
Irr_Domain    = Proton
Irr_Freq      = 600.1723046 [MHz]
Irr_Offset    = 5 [ppm]
Clipped       = TRUE
Scans         = 400
Total_Scans   = 400

Relaxation_Delay = 2 [s]
Recvr_Gain       = 54
Temp_Get         = 22 [dC]
X_90_Width      = 9 [us]
X_Acq_Time      = 0.69206016 [s]
X_Angle         = 30 [deg]
X_Atn           = 8 [dB]
X_Pulse        = 3 [us]
Irr_Atn_Dec    = 18 [dB]
Irr_Atn_Noise = 18 [dB]
Irr_Noise      = WALTZ
Irr_Fwidth     = 76 [us]
Decoupling     = TRUE
Initial_Wait   = 1 [s]
Noe_Time       = TRUE
Repetition_Time = 2 [s]
    
```



```

File Name      = /Users/HaruhikoFuwa/Docume
Author        = delta
Experiment    = proton.jxp
Sample Id     = TN-I-186
Solvent       = CHLOROFORM-D
Creation Time = 27-APR-2012 00:18:47
Revision Time = 13-JUN-2012 14:54:07
Current Time  = 13-JUN-2012 14:54:58

Comment       = single pulse
Data Format   = 1D COMPLEX
Dim Size     = 26214
Dim Title    = Proton
Dim Units    = [ppm]
Dimensions   = X
Site         = ECA600
Spectrometer = DELTAZ_NMR

Field Strength = 14.09636928 [T] (600 [MHz])
X_Acq_Duration = 2.18103808 [s]
X_Domain       = 1H
X_Freq         = 600.1723046 [MHz]
X_Offset       = 5 [ppm]
X_Points       = 32768
X_Prescans     = 1
X_Resolution   = 0.45849727 [Hz]
X_Sweep        = 15.02403846 [kHz]
X_Sweep_Clip   = 12.01923077 [kHz]
Irr_Domain     = Proton
Irr_Freq       = 600.1723046 [MHz]
Irr_Offset     = 5 [ppm]
Tri_Domain     = Proton
Tri_Freq       = 600.1723046 [MHz]
Tri_Offset     = 5 [ppm]
Clipped        = FALSE
Scans          = 8
Total_Scans    = 8

Relaxation_Delay = 2 [s]
Recvr_Gain       = 38
Temp_Get         = 21.6 [dC]
X_90_Width      = 12.2 [us]
X_Acq_Time      = 2.18103808 [s]
X_Angle         = 45 [deg]
X_Atn           = 3 [dB]
X_Pulse         = 6.1 [us]
Irr_Mode        = Off
Tri_Mode        = Off
Dante_Preset    = FALSE
Initial Wait    = 1 [s]
Repetition_Time = 4.18103808 [s]
    
```

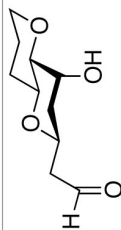

13 (2,6-cis/2,6-trans 15:1)

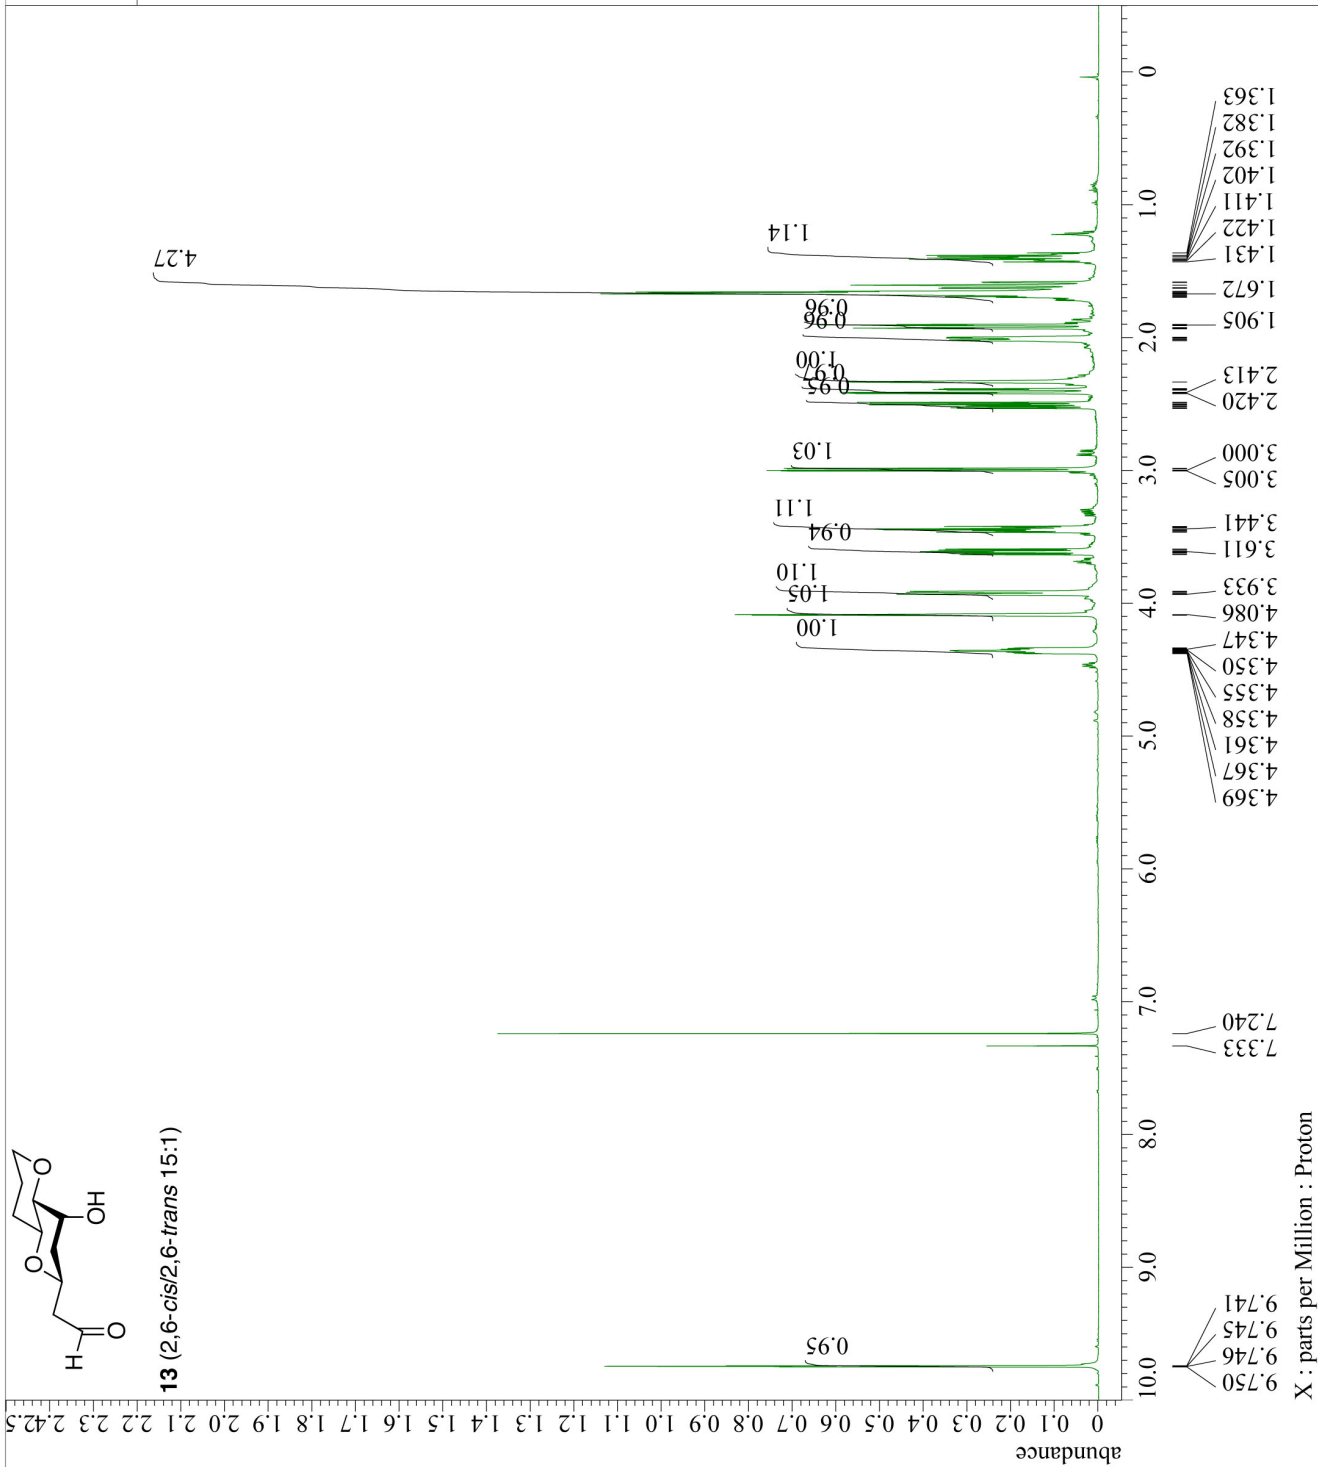

X : parts per Million : Proton

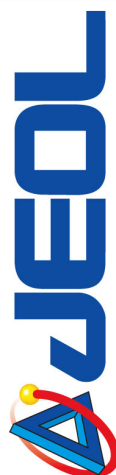

```

File Name      = /Users/HaruhikoFuwa/Docume
Author        = delta
Experiment    = carbon.jpg
Sample Id     = TN-I-186
Solvent       = CHLOROFORM-D
Creation Time = 27-APR-2012 00:35:37
Revision Time = 13-JUN-2012 14:55:40
Current_Time  = 13-JUN-2012 14:55:57

Comment       = single pulse decoupled gat
Data Format    = 1D COMPLEX
Dim_Sizes     = 26214
Dim_Title     = Carbon13
Dim_Units     = [ppm]
Dimensions    = X
Site          = ECA600
Spectrometer  = DELTAZ_NMR

Field Strength = 14.09636928 [T] (600 [MHz])
X_Acq_Duration = 0.69206016 [s]
X_Domain       = 13C
X_Freq         = 150.91343039 [MHz]
X_Offset       = 100 [ppm]
X_Points       = 32768
X_Prescans     = 4
X_Resolution   = 1.44496109 [Hz]
X_Sweep        = 47.34848485 [kHz]
X_Sweep_Clip   = 37.87878788 [kHz]
Irr_Domain     = Proton
Irr_Freq       = 600.1723046 [MHz]
Irr_Offset     = 5 [ppm]
Clipped        = TRUE
Scans          = 11600
Total_Scans    = 11600

Relaxation_Delay = 2 [s]
Recvr_Gain       = 56
Temp_Get         = 22.5 [dC]
X_90_Width      = 9 [us]
X_Acq_Time      = 0.69206016 [s]
X_Angle         = 30 [deg]
X_Atn           = 8 [dB]
X_Pulse         = 3 [us]
Irr_Atn_Dec     = 18 [dB]
Irr_Atn_Noise  = 18 [dB]
Irr_Noise       = WALTZ
Irr_Fwidth      = 76 [us]
Decoupling      = TRUE
Initial_Wait    = 1 [s]
Noe_Time        = TRUE
Repetition_Time = 2.69206016 [s]
    
```

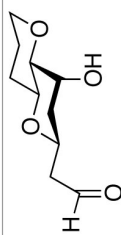

13 (2,6-cis/2,6-trans 15:1)

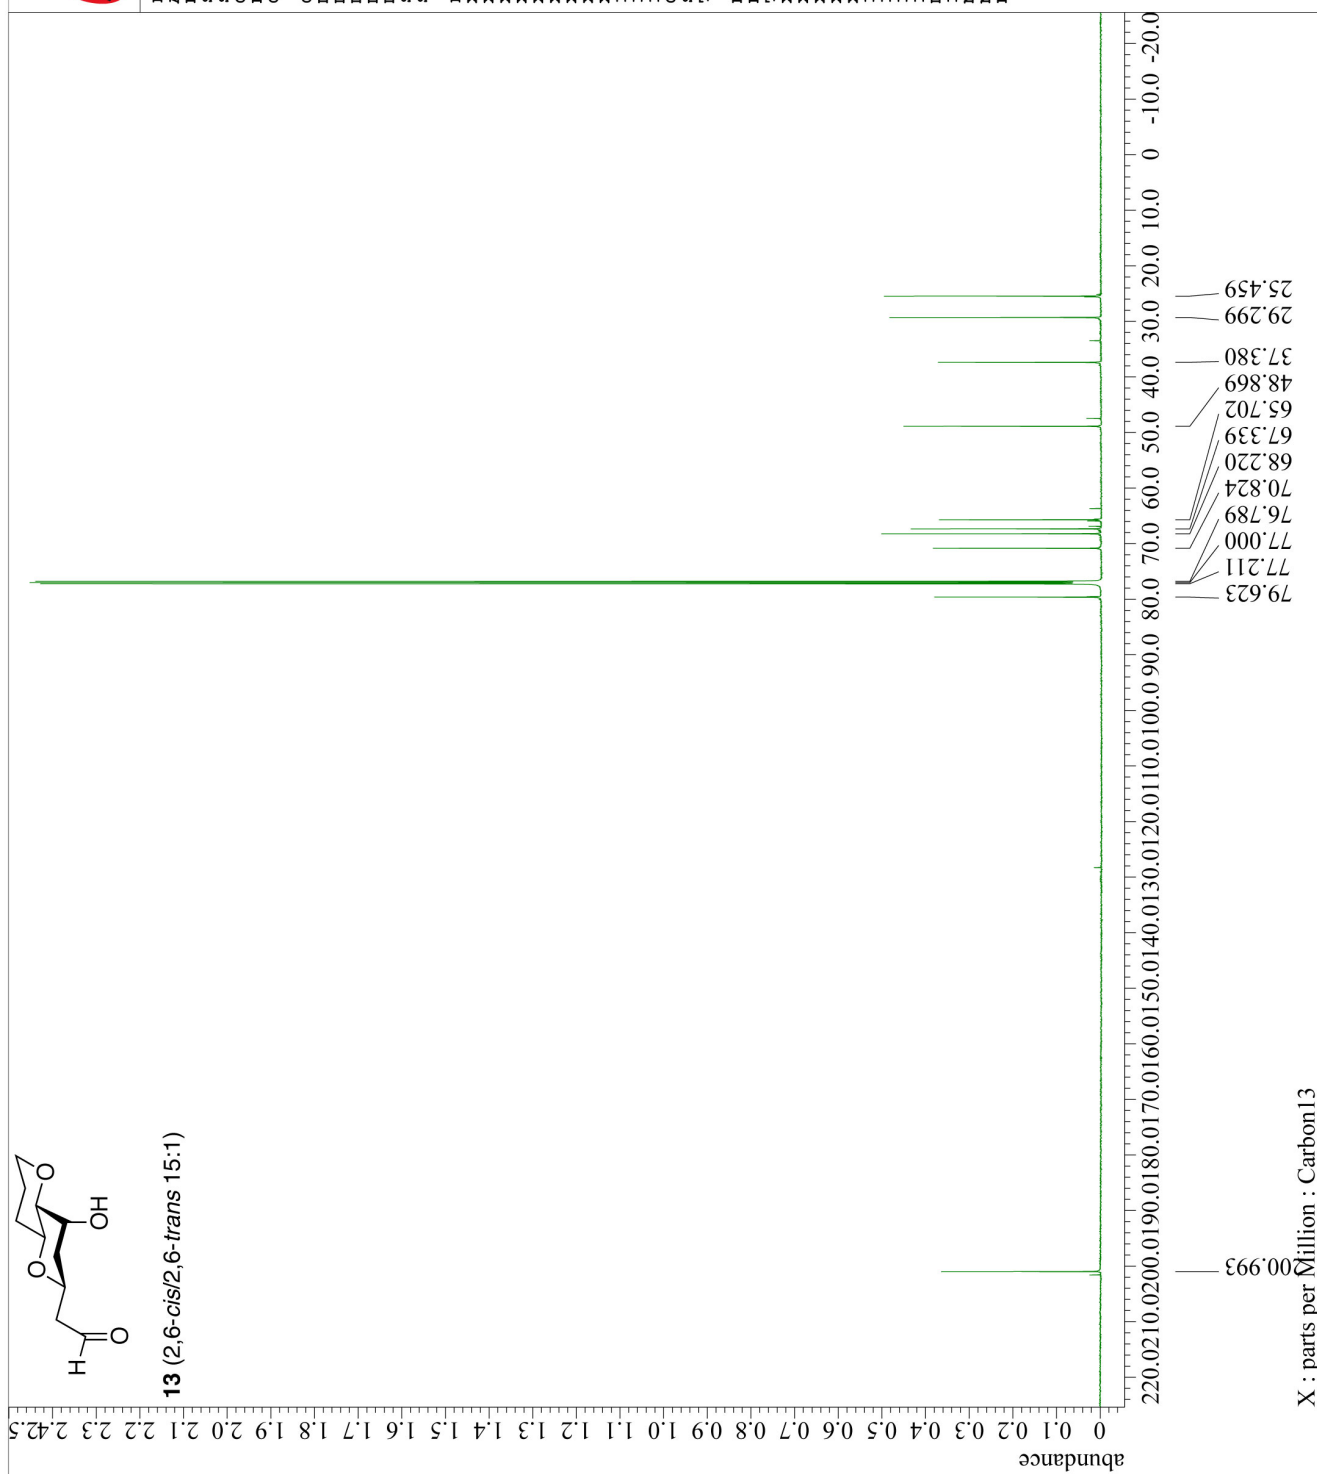

X : parts per Million : Carbon13



```

File Name      = /Users/HaruhikoFuwa/Docume
Author        = delta
Experiment    = proton.jpg
Sample Id     = TN-I-154
Solvent       = CHLOROFORM-D
Creation Time = 13-JUN-2012 16:40:50
Revision Time = 13-JUN-2012 15:06:34
Current Time  = 13-JUN-2012 15:07:11

Comment       = single pulse
Data Format    = 1D COMPLEX
Dim Size      = 26214
Dim Title     = Proton
Dim Units     = [ppm]
Dimensions    = X
Site          = ECA600
Spectrometer = DELTAZ_NMR

Field Strength = 14.09636928 [T] (600 [MHz])
X_Acq_Duration = 2.18103808 [s]
X_Domain       = 1H
X_Freq         = 600.1723046 [MHz]
X_Offset      = 5 [ppm]
X_Points      = 32768
X_Prescans    = 1
X_Resolution  = 0.45849727 [Hz]
X_Sweep       = 15.02403846 [kHz]
X_Sweep_Clip = 12.01923077 [kHz]
Irr_Domain    = Proton
Irr_Freq      = 600.1723046 [MHz]
Irr_Offset    = 5 [ppm]
Tri_Domain    = Proton
Tri_Freq      = 600.1723046 [MHz]
Tri_Offset    = 5 [ppm]
Clipped       = FALSE
Scans         = 8
Total_Scans   = 8

Relaxation_Delay = 2 [s]
Recvr_Gain       = 30
Temp_Get        = 21.9 [dC]
X_90_Width     = 12.2 [us]
X_Acq_Time     = 2.18103808 [s]
X_Angle        = 45 [deg]
X_Atn          = 3 [dB]
X_Pulse        = 6.1 [us]
Irr_Mode       = Off
Tri_Mode       = Off
Dante_Presat   = FALSE
Initial Wait    = 1 [s]
Repetition_Time = 4.18103808 [s]
    
```

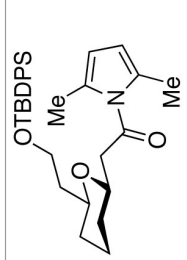

**14** (2,6-*cis*/2,6-*trans* >20:1)

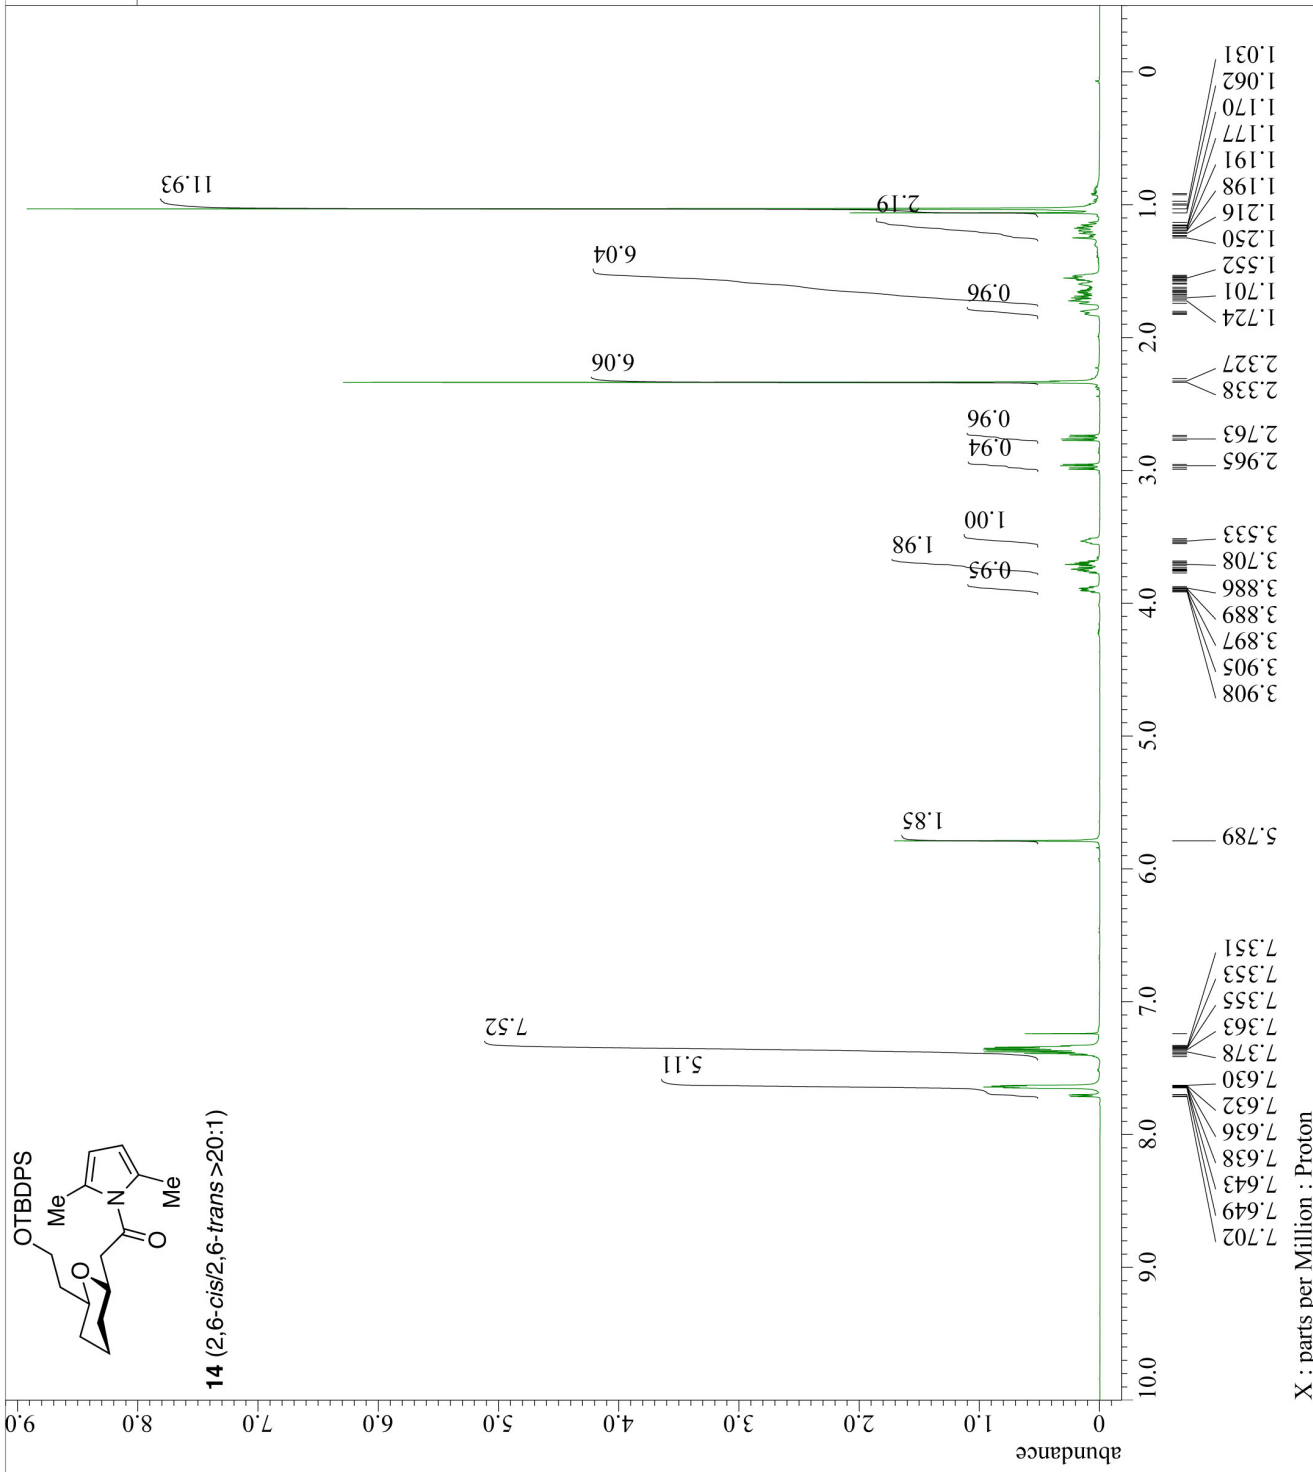

X : parts per Million : Proton

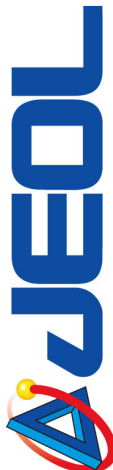

```

File Name      = /Users/HaruhikoFuwa/Docume
Author        = delta
Experiment    = carbon.jxp
Sample Id     = TN-I-154
Solvent       = CHLOROFORM-D
Creation Time  = 1-JUN-2012 16:43:36
Revision Time = 13-JUN-2012 15:07:41
Current Time  = 13-JUN-2012 15:07:53

Comment       = single pulse decoupled gat
Data Format    = 1D COMPLEX
Dim Size      = 26214
Dim Title     = Carbon13
Dim Units     = [ppm]
Dimensions    = X
Site          = ECA600
Spectrometer  = DELTAZ_NMR

Field Strength = 14.09636928 [T] (600 [MHz])
X_Acq_Duration = 0.69206016 [s]
X_Domain       = 13C
X_Freq         = 150.91343039 [MHz]
X_Offset       = 100 [ppm]
X_Points       = 32768
X_Prescans     = 4
X_Resolution   = 1.44496109 [Hz]
X_Sweep        = 47.34848485 [kHz]
X_Sweep_Clip   = 37.87878788 [kHz]
Irr_Domain     = Proton
Irr_Freq       = 600.1723046 [MHz]
Irr_Offset     = 5 [ppm]
Clipped        = FALSE
Scans          = 80
Total_Scans    = 80

Relaxation_Delay = 2 [s]
Recvr_Gain       = 54
Temp_Get         = 22.7 [dC]
X_90_Width      = 9 [us]
X_Acq_Time       = 0.69206016 [s]
X_Angle          = 30 [deg]
X_Atn            = 8 [dB]
X_Pulse         = 3 [us]
Irr_Atn_Dec     = 18 [dB]
Irr_Atn_Noise   = 18 [dB]
Irr_Noise       = WAITZ
Irr_Fwidth      = 76 [us]
Decoupling      = TRUE
Initial_Wait    = 1 [s]
Noe_Time         = TRUE
Repetition_Time = 2 [s]
    
```

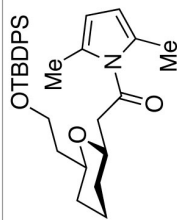

**14** (2,6-*cis*/2,6-*trans* >20:1)

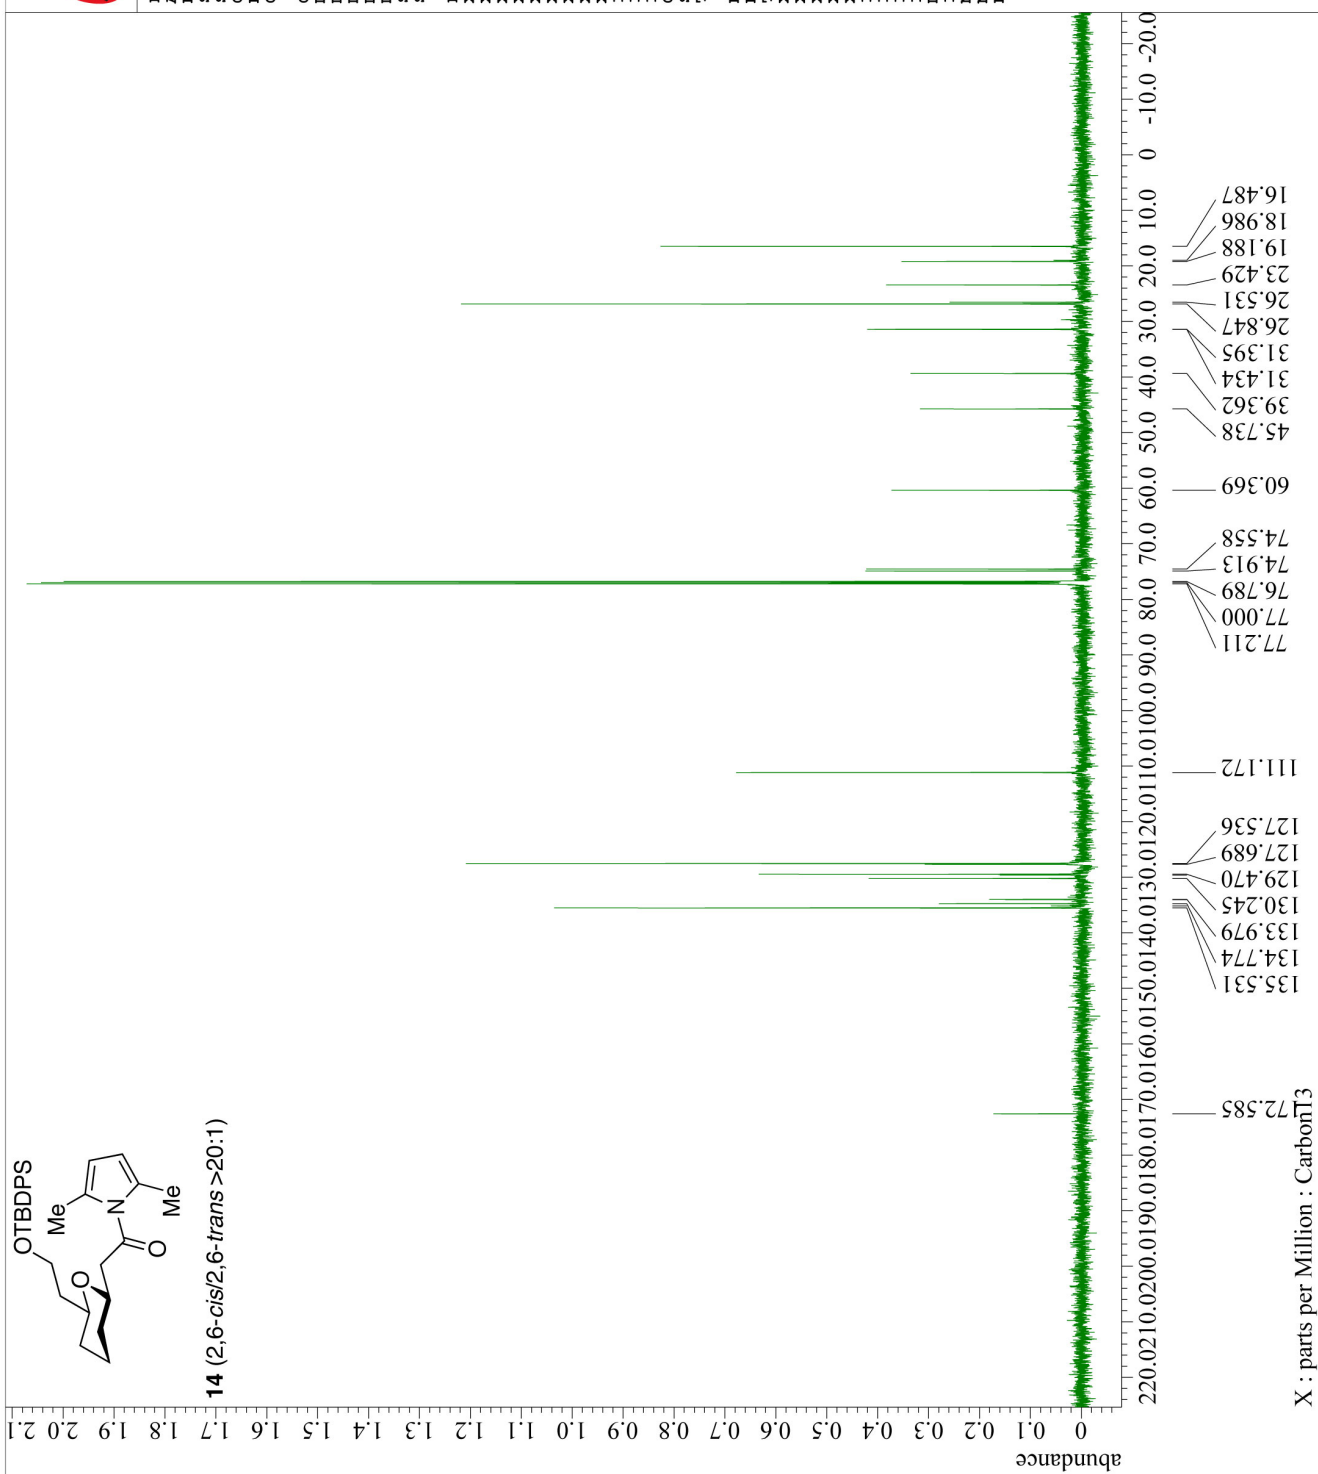

X : parts per Million : Carbon13



```

File Name      = /Users/HaruhikoFuwa/Docume
Author        = delta
Experiment    = proton.jxp
Sample Id     = TN-I-170a
Solvent       = CHLOROFORM-D
Creation Time = 1-JUN-2012 18:13:04
Revision Time = 13-JUN-2012 15:11:42
Current Time  = 13-JUN-2012 15:12:13

Comment       = single pulse
Data Format   = 1D COMPLEX
Data Size    = 26214
Dim Title    = Proton
Dim Units    = [ppm]
Dimensions   = X
Site         = ECA600
Spectrometer = DELTAZ_NMR

Field Strength = 14.09636928 [T] (600 [MHz])
X_Acq_Duration = 2.18103808 [s]
X_Domain       = 1H
X_Freq        = 600.1723046 [MHz]
X_Offset      = 5 [ppm]
X_Points      = 32768
X_Prescans    = 1
X_Resolution  = 0.45849727 [Hz]
X_Sweep       = 15.02403846 [kHz]
X_Sweep_Clip = 12.01923077 [kHz]
Irr_Domain    = Proton
Irr_Freq      = 600.1723046 [MHz]
Irr_Offset    = 5 [ppm]
Tri_Domain    = proton
Tri_Freq      = 600.1723046 [MHz]
Tri_Offset    = 5 [ppm]
Clipped       = FALSE
Scans         = 8
Total_Scans   = 8

Relaxation_Delay = 2 [s]
Recvr_Gain       = 36
Temp_Get        = 22.2 [dC]
X_90_Width     = 12.2 [us]
X_Acq_Time     = 2.18103808 [s]
X_Angle        = 45 [deg]
X_Atn          = 3 [dB]
X_Pulse        = 6.1 [us]
Irr_Mode       = Off
Tri_Mode       = Off
Dante_Preset   = FALSE
Initial Wait   = 1 [s]
Repetition_Time = 4.18103808 [s]
    
```

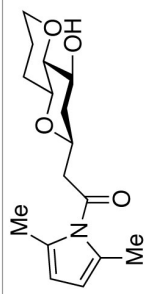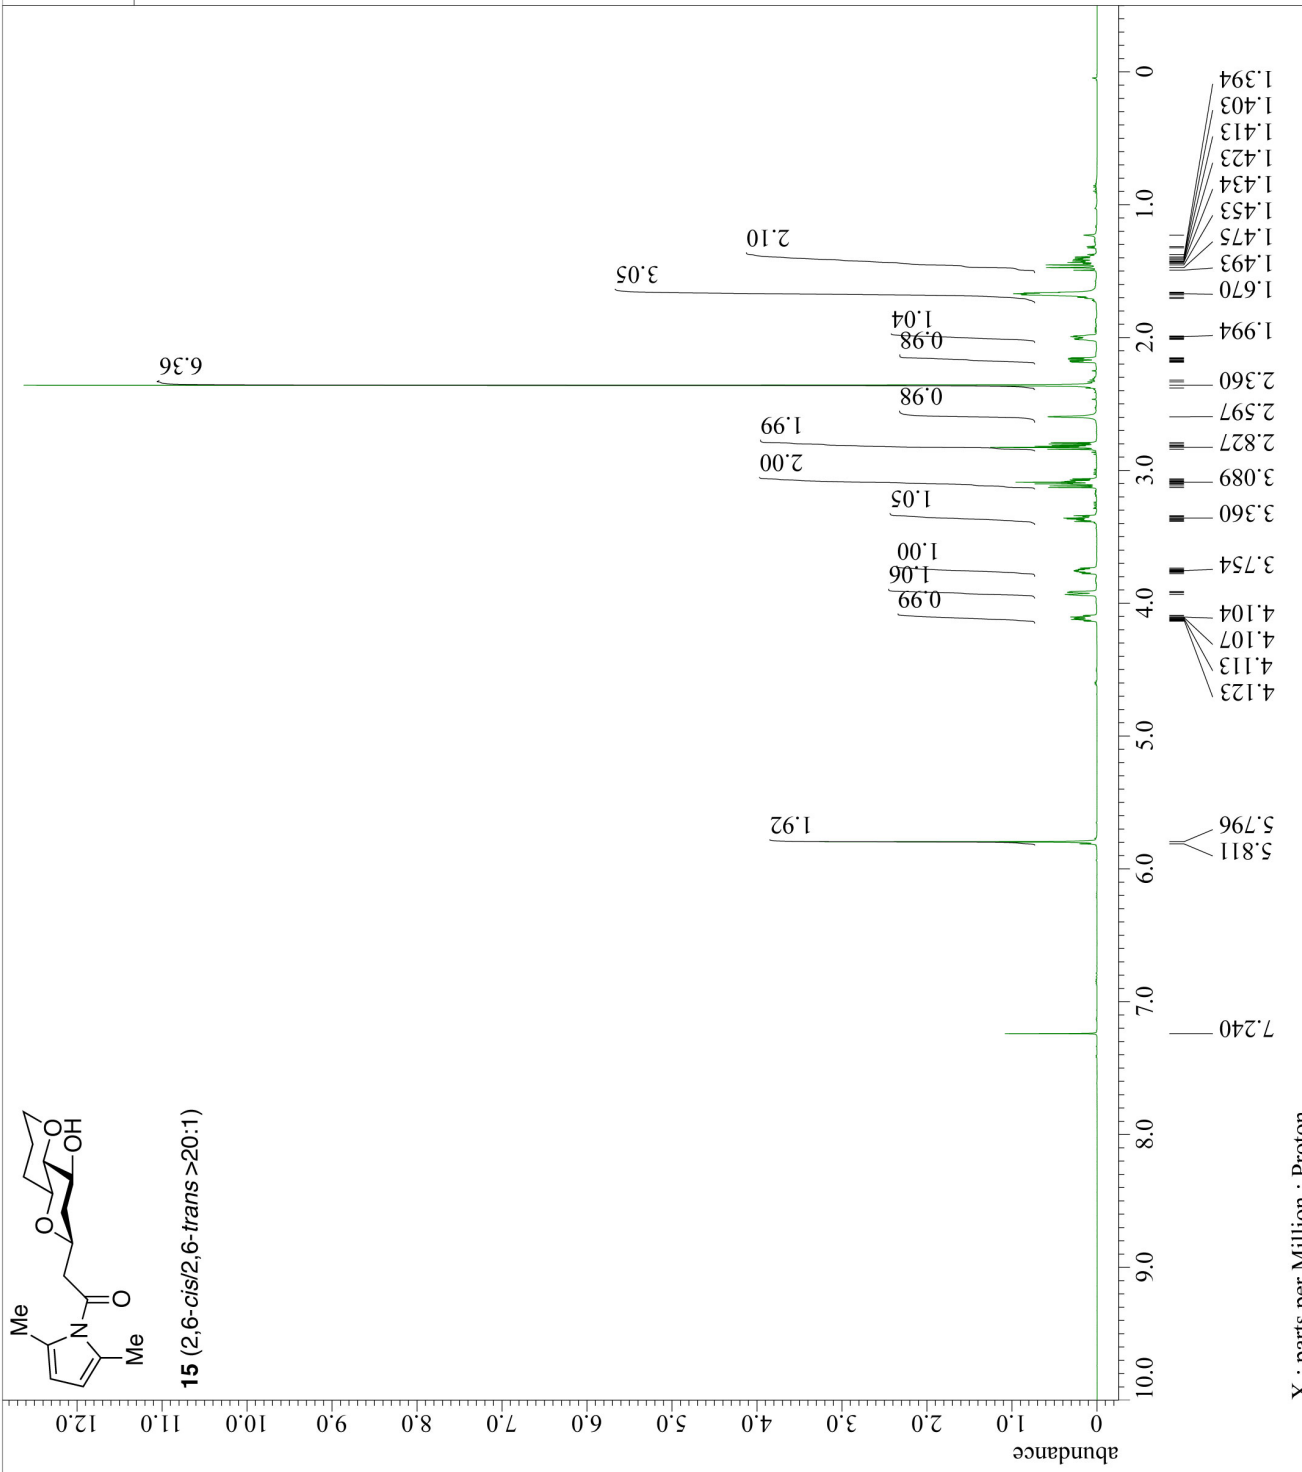

X : parts per Million : Proton





```

File Name      = /Users/HaruhikoFuwa/Docume
Author        = delta
Experiment    = carbon.jpg
Sample Id     = TN-I-170a
Solvent       = CHLOROFORM-D
Creation Time = 1-JUN-2012 18:15:49
Revision Time = 13-JUN-2012 15:12:42
Current_Time  = 13-JUN-2012 15:12:55

Comment       = single pulse decoupled gat
Data Format   = 1D COMPLEX
Dim_Sizes    = 26214
Dim_Title    = Carbon13
Dim_Units    = [ppm]
Dimensions    = X
Site         = ECA600
Spectrometer = DELTAZ_NMR

Field Strength = 14.09636928 [T] (600 [MHz])
X_Acq_Duration = 0.69206016 [s]
X_Domain       = 13C
X_Freq         = 150.91343039 [MHz]
X_Offset       = 100 [ppm]
X_Points       = 32768
X_Prescans     = 4
X_Resolution   = 1.44496109 [Hz]
X_Sweep        = 47.34848485 [kHz]
X_Sweep_Clip   = 37.87878788 [kHz]
Irr_Domain     = Proton
Irr_Freq       = 600.1723046 [MHz]
Irr_Offset     = 5 [ppm]
Clipped        = FALSE
Scans          = 64
Total_Scans    = 64

Relaxation_Delay = 2 [s]
Recvr_Gain       = 56
Temp_Get         = 22.5 [dC]
X_90_Width       = 9 [us]
X_Acq_Time       = 0.69206016 [s]
X_Angle          = 30 [deg]
X_Atn            = 8 [dB]
X_Pulse         = 3 [us]
Irr_Atn_Dec     = 18 [dB]
Irr_Atn_Noise   = 18 [dB]
Irr_Noise       = WALTZ
Irr_Fwidth      = 76 [us]
Decoupling      = TRUE
Initial_Wait    = 1 [s]
Noe_Time        = TRUE
Repetition_Time = 2 [s]
    
```

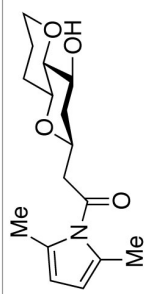

**15** (2,6-cis/2,6-trans >20:1)

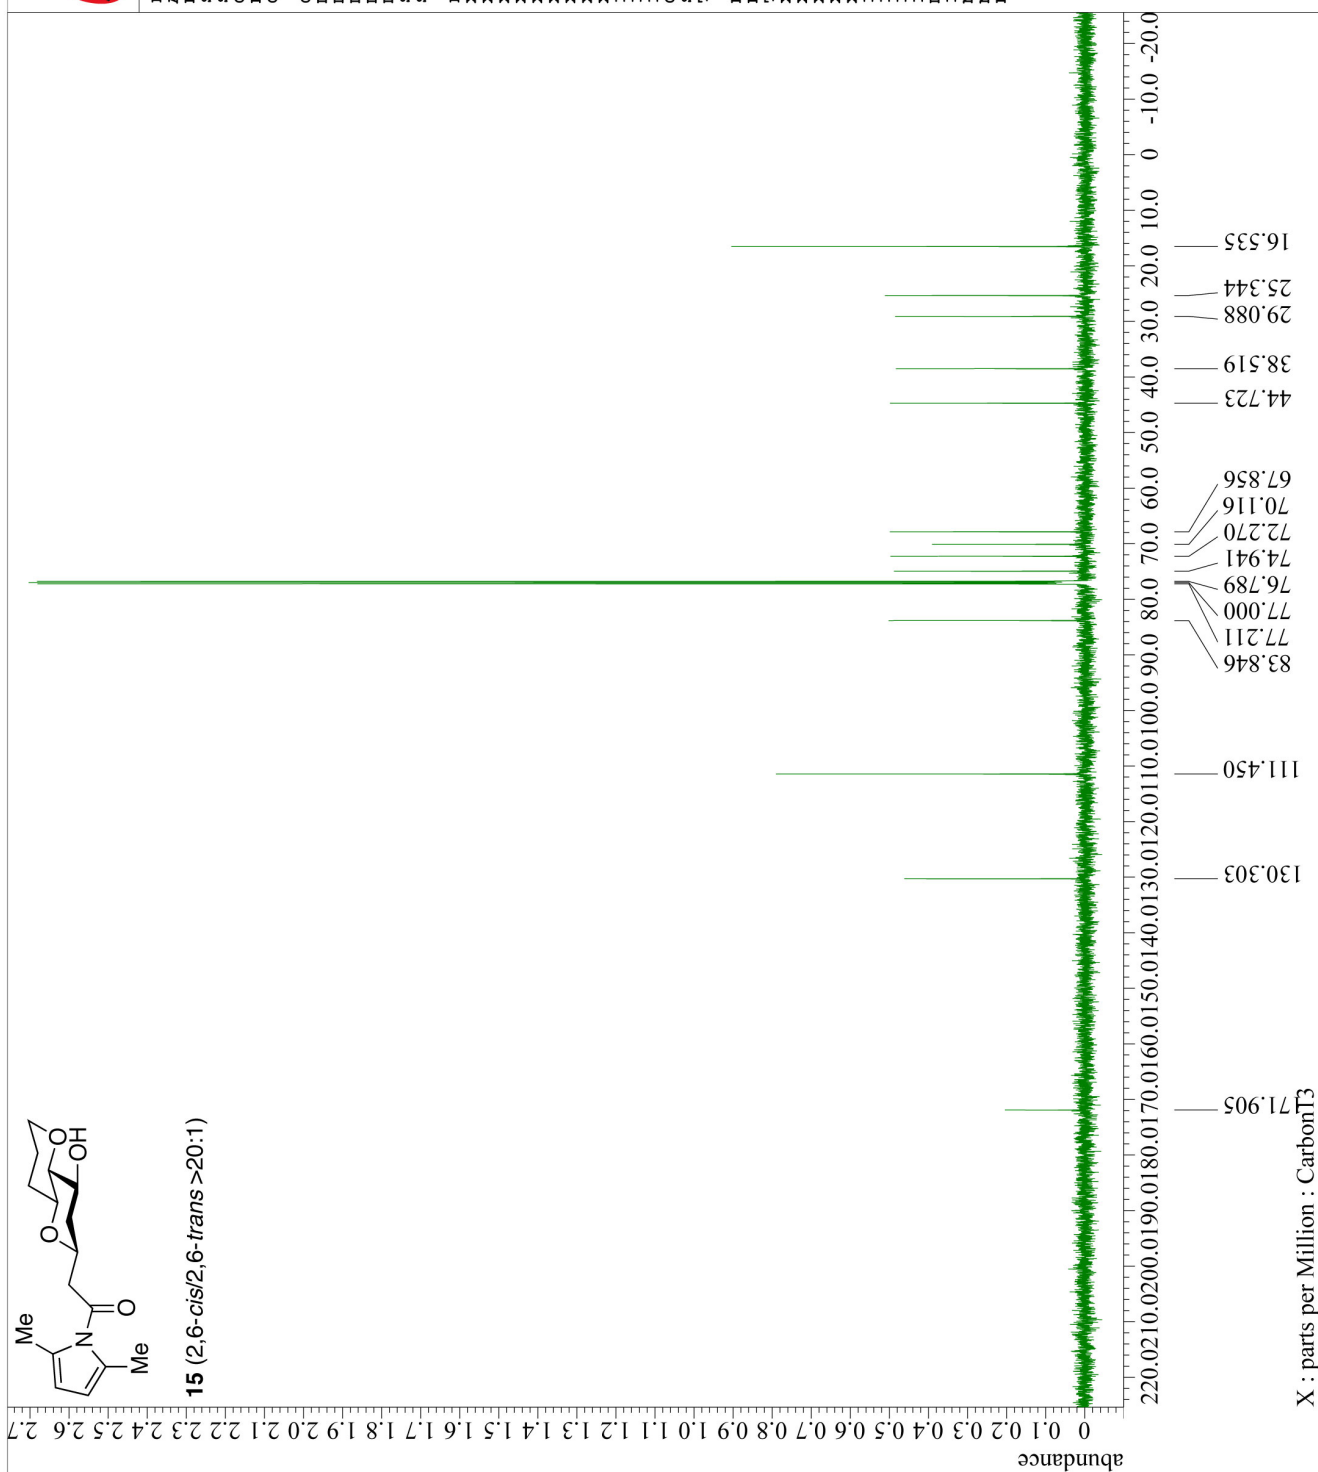



```

File Name      = /Users/HaruhikoFuwa/Docume
Author        = delta
Experiment    = proton.jpg
Sample Id     = TN-I-171a
Solvent       = CHLOROFORM-D
Creation Time = 1-JUN-2012 18:26:43
Revision Time = 13-JUN-2012 15:16:19
Current Time  = 13-JUN-2012 15:16:41

Comment       = single pulse
Data Format    = 1D COMPLEX
Dir Size      = 26214
Dir Title     = Proton
Dir Units     = [ppm]
Dimensions    = X
Site          = ECA600
Spectrometer  = DELTAZ_NMR

Field Strength = 14.09636928 [T] (600 [MHz])
X_Acq_Duration = 2.18103808 [s]
X_Domain       = 1H
X_Freq         = 600.1723046 [MHz]
X_Offset       = 5 [ppm]
X_Points       = 32768
X_Prescans     = 1
X_Resolution   = 0.45849727 [Hz]
X_Sweep        = 15.02403846 [kHz]
X_Sweep_Clip   = 12.01923077 [kHz]
Irr_Domain     = Proton
Irr_Freq       = 600.1723046 [MHz]
Irr_Offset     = 5 [ppm]
Tri_Domain     = Proton
Tri_Freq       = 600.1723046 [MHz]
Tri_Offset     = 5 [ppm]
Clipped        = FALSE
Scans          = 8
Total_Scans    = 8

Relaxation_Delay = 2 [s]
Recvr_Gain       = 30
Temp_Get         = 21.9 [dC]
X_90_Width      = 12.2 [us]
X_Acq_Time      = 2.18103808 [s]
X_Angle         = 45 [deg]
X_Atn           = 3 [dB]
X_Pulse         = 6.1 [us]
Irr_Mode        = Off
Tri_Mode        = Off
Dante_Preset    = FALSE
Initial Wait    = 1 [s]
Repetition_Time = 4.18103808 [s]
    
```

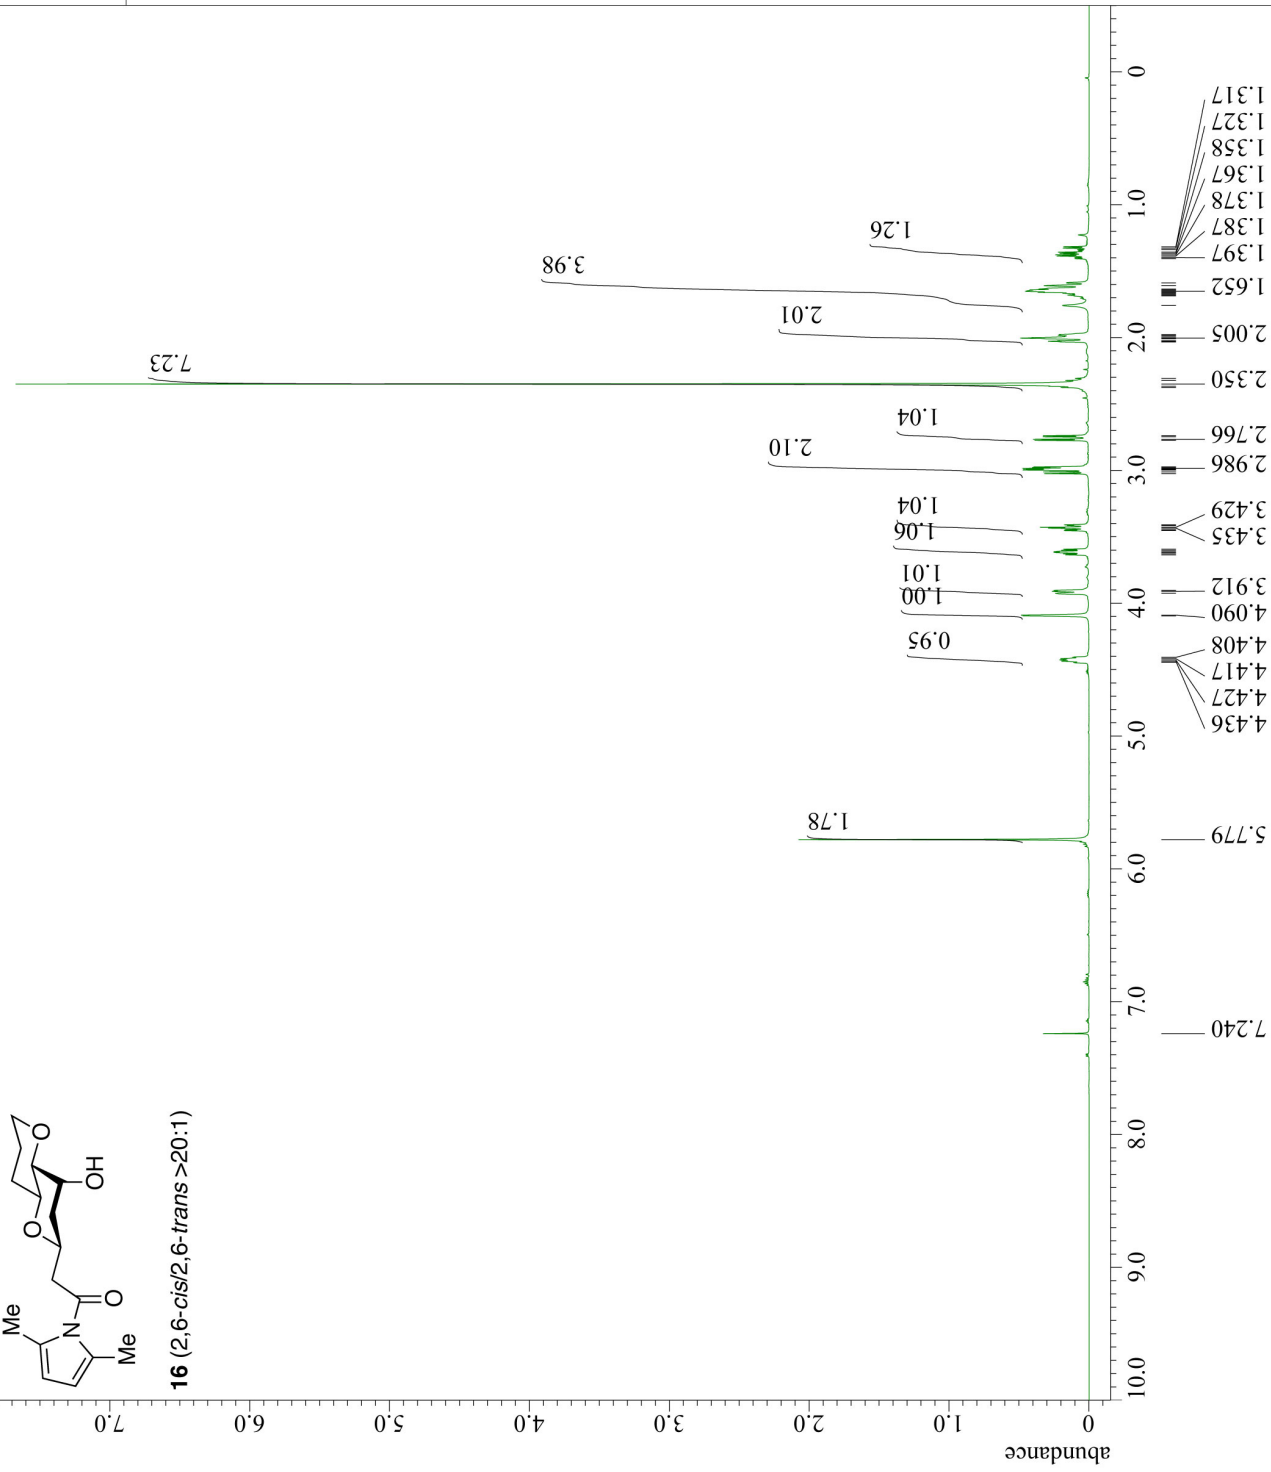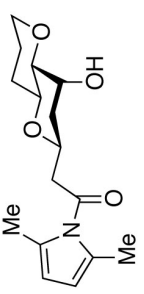

**16** (2,6-cis/2,6-trans >20:1)

X : parts per Million : Proton





```

File Name      = /Users/HaruhikoFuwa/Docume
Author         = delta
Experiment     = carbon.jpg
Sample Id     = TN-I-171a
Solvent       = CHLOROFORM-D
Creation Time  = 1-JUN-2012 18:29:28
Revision Time = 13-JUN-2012 15:17:09
Current_Time  = 13-JUN-2012 15:17:21

Comment       = single pulse decoupled gat
Data Format    = 1D COMPLEX
Dim Size      = 26214
Dim Title     = Carbon13
Dim Units     = [ppm]
Dimensions    = X
Site          = ECA600
Spectrometer  = DELTAZ_NMR

Field Strength = 14.09636928 [T] (600 [MHz])
X_Acq_Duration = 0.69206016 [s]
X_Domain       = 13C
X_Freq         = 150.91343039 [MHz]
X_Offset       = 100 [ppm]
X_Points       = 32768
X_Prescans     = 4
X_Resolution   = 1.44496109 [Hz]
X_Sweep        = 47.34848485 [kHz]
X_Sweep_Clip   = 37.87878788 [kHz]
Irr_Domain     = Proton
Irr_Freq       = 600.1723046 [MHz]
Irr_Offset     = 5 [ppm]
Clipped        = FALSE
Scans          = 32
Total_Scans    = 32

Relaxation_Delay = 2 [s]
Recvr_Gain       = 56
Temp_Get         = 22.5 [dC]
X_90_Width      = 9 [us]
X_Acq_Time       = 0.69206016 [s]
X_Angle         = 30 [deg]
X_Atn           = 8 [dB]
X_Pulse         = 3 [us]
Irr_Atn_Dec     = 18 [dB]
Irr_Atn_Noise  = 18 [dB]
Irr_Noise       = WALTZ
Irr_Fwidth      = 76 [us]
Decoupling      = TRUE
Initial_Wait    = 1 [s]
Noe_Time        = TRUE
Repetition_Time = 2 [s]
    
```

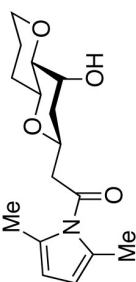

**16** (2,6-cis/2,6-trans >20:1)

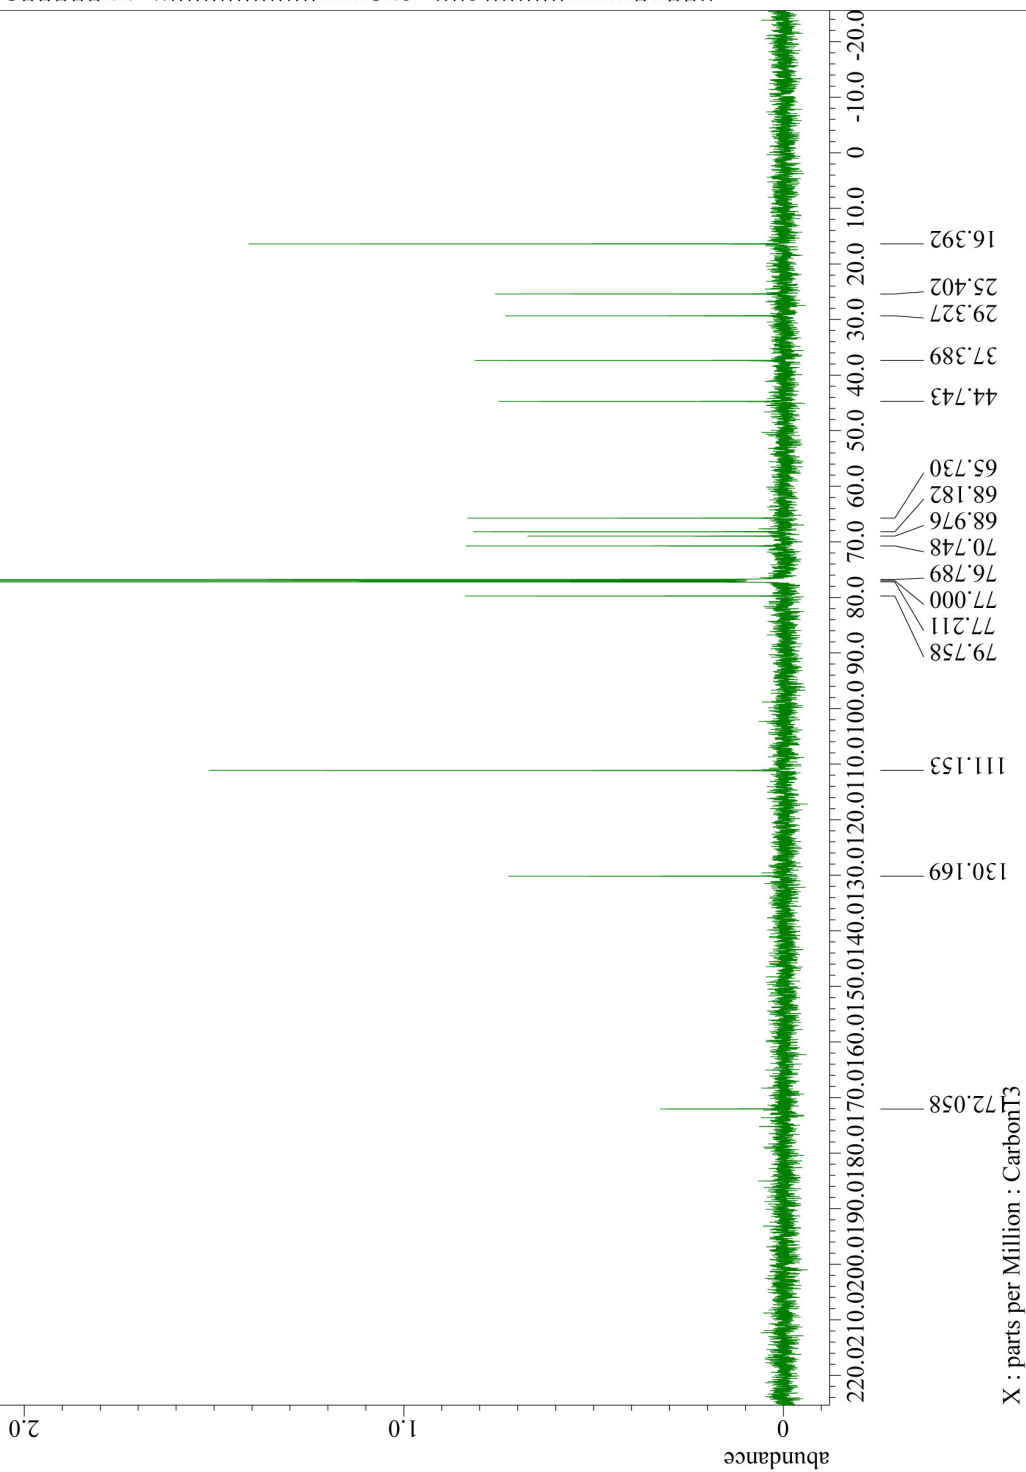

X : parts per Million : Carbon13

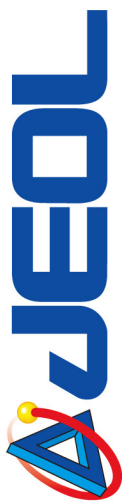

```

File Name      = /Users/HaruhikoFuwa/Docume
Author        = delta
Experiment    = proton.jxp
Sample Id     = TN-I-188a
Solvent       = CHLOROFORM-D
Creation Time = 3-AUG-2012 18:10:21
Revision Time = 6-AUG-2012 13:29:59
Current Time  = 6-AUG-2012 13:42:30

Comment       = single pulse
Data Format    = 1D COMPLEX
Dim Size      = 26214
Dim Title     = Proton
Dim Units     = [ppm]
Dimensions    = X
Site          = ECA600
Spectrometer  = DELTA2_NMR

Field Strength = 14.09636928[T] (600 [MHz])
X Acq Duration = 2.18103808[s]
X Domain       = 1H
X Freq         = 600.1723046 [MHz]
X Offset       = 5 [ppm]
X Points       = 32768
X Prescans     = 1
X Resolution   = 0.45849727 [Hz]
X Sweep        = 15.02403846 [kHz]
X Sweep Clipped = 12.01923077 [kHz]
Irr Domain     = Proton
Irr Freq       = 600.1723046 [MHz]
Irr Offset     = 5 [ppm]
Tri Domain     = Proton
Tri Freq       = 600.1723046 [MHz]
Tri Offset     = 5 [ppm]
Clipped        = FALSE
Scans          = 8
Total Scans    = 8

Relaxation Delay = 2 [s]
Recvr Gain       = 32
Temp Get         = 22.1 [dC]
X 90 Width      = 11.6 [us]
X Acq Time      = 2.18103808 [s]
X Angle         = 45 [deg]
X Atn           = 3 [dB]
X Pulse         = 5.8 [us]
Irr Mode        = Off
Tri Mode        = Off
Dante Presat    = FALSE
Initial Wait    = 1 [s]
Repetition Time = 4.18103808 [s]
    
```

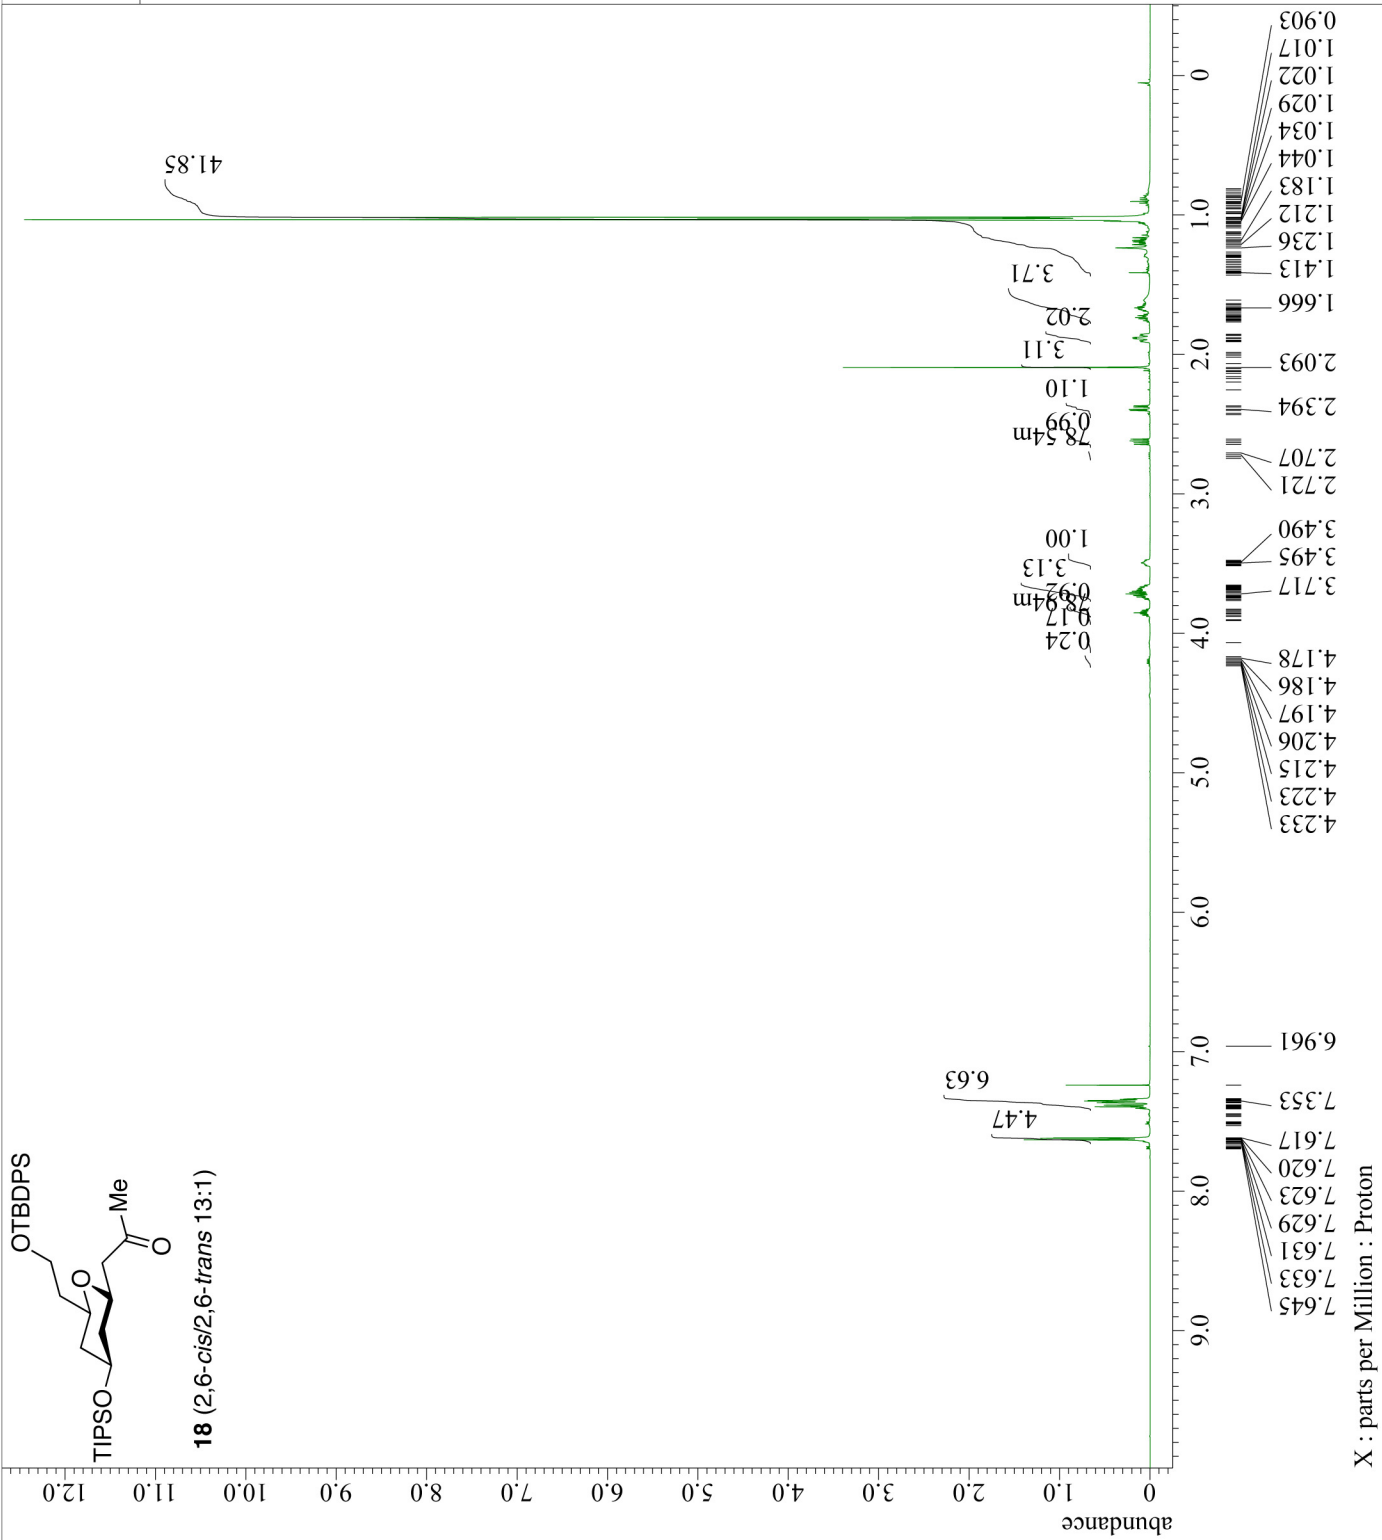

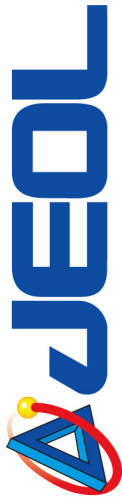

```

File Name      = /Users/HaruhikoFuwa/desktop
Author        = delta
Experiment    = carbon.jxp
Sample Id     = TN-I-188a
Solvent       = CHLOROFORM-D
Creation Time  = 3-AUG-2012 18:13:03
Revision Time = 6-AUG-2012 13:45:49
Current Time  = 6-AUG-2012 13:45:58

Comment       = single pulse decoupled gat
Data Format    = 1D COMPLEX
Dim Size      = 26214
Dim Title     =
Dim Units     = Carbon13
Dimensions    = [ppm]
Site          = X
Spectrometer  = ECA600
              = DELTA2_NMR

Field Strength = 14.09636928[T] (600 [MHz])
X Acq_Duration = 0.69206016[s]
X Domain       = 13C
X Freq         = 150.91343039 [MHz]
X Offset       = 100 [ppm]
X Points       = 32768
X Prescans     = 4
X Resolution   = 1.44496109 [Hz]
X Sweep        = 47.34848485 [kHz]
X Sweep_Clip   = 37.87878788 [kHz]
Irr Domain     = Proton
Irr Freq       = 600.1723046 [MHz]
Irr Offset     = 5 [ppm]
Clipped        = FALSE
Scans          = 144
Total_Scans    = 144

Relaxation_Delay = 2 [s]
Recvr_Gain       = 56
Temp_Get         = 22.6 [dC]
X 90_Width      = 9.25 [us]
X Acq_Time       = 0.69206016 [s]
X Angle         = 30 [deg]
X Atn           = 8 [dB]
X Pulse         = 3.08333333 [us]
Irr_Atn_Dec     = 19.327 [dB]
Irr_Atn_Noise  = 19.327 [dB]
Irr_Noise       = WALTZ
Irr_Width       = 76 [us]
Decoupling      = TRUE
Initial_Wait    = 1 [s]
Noe              = TRUE
Noe Time        = 2 [s]
Repetition_Time = 2.69206016 [s]
    
```

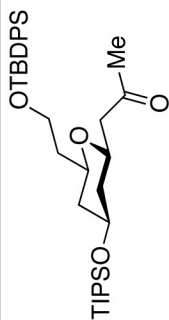

**18** (2,6-cis/2,6-trans 13:1)

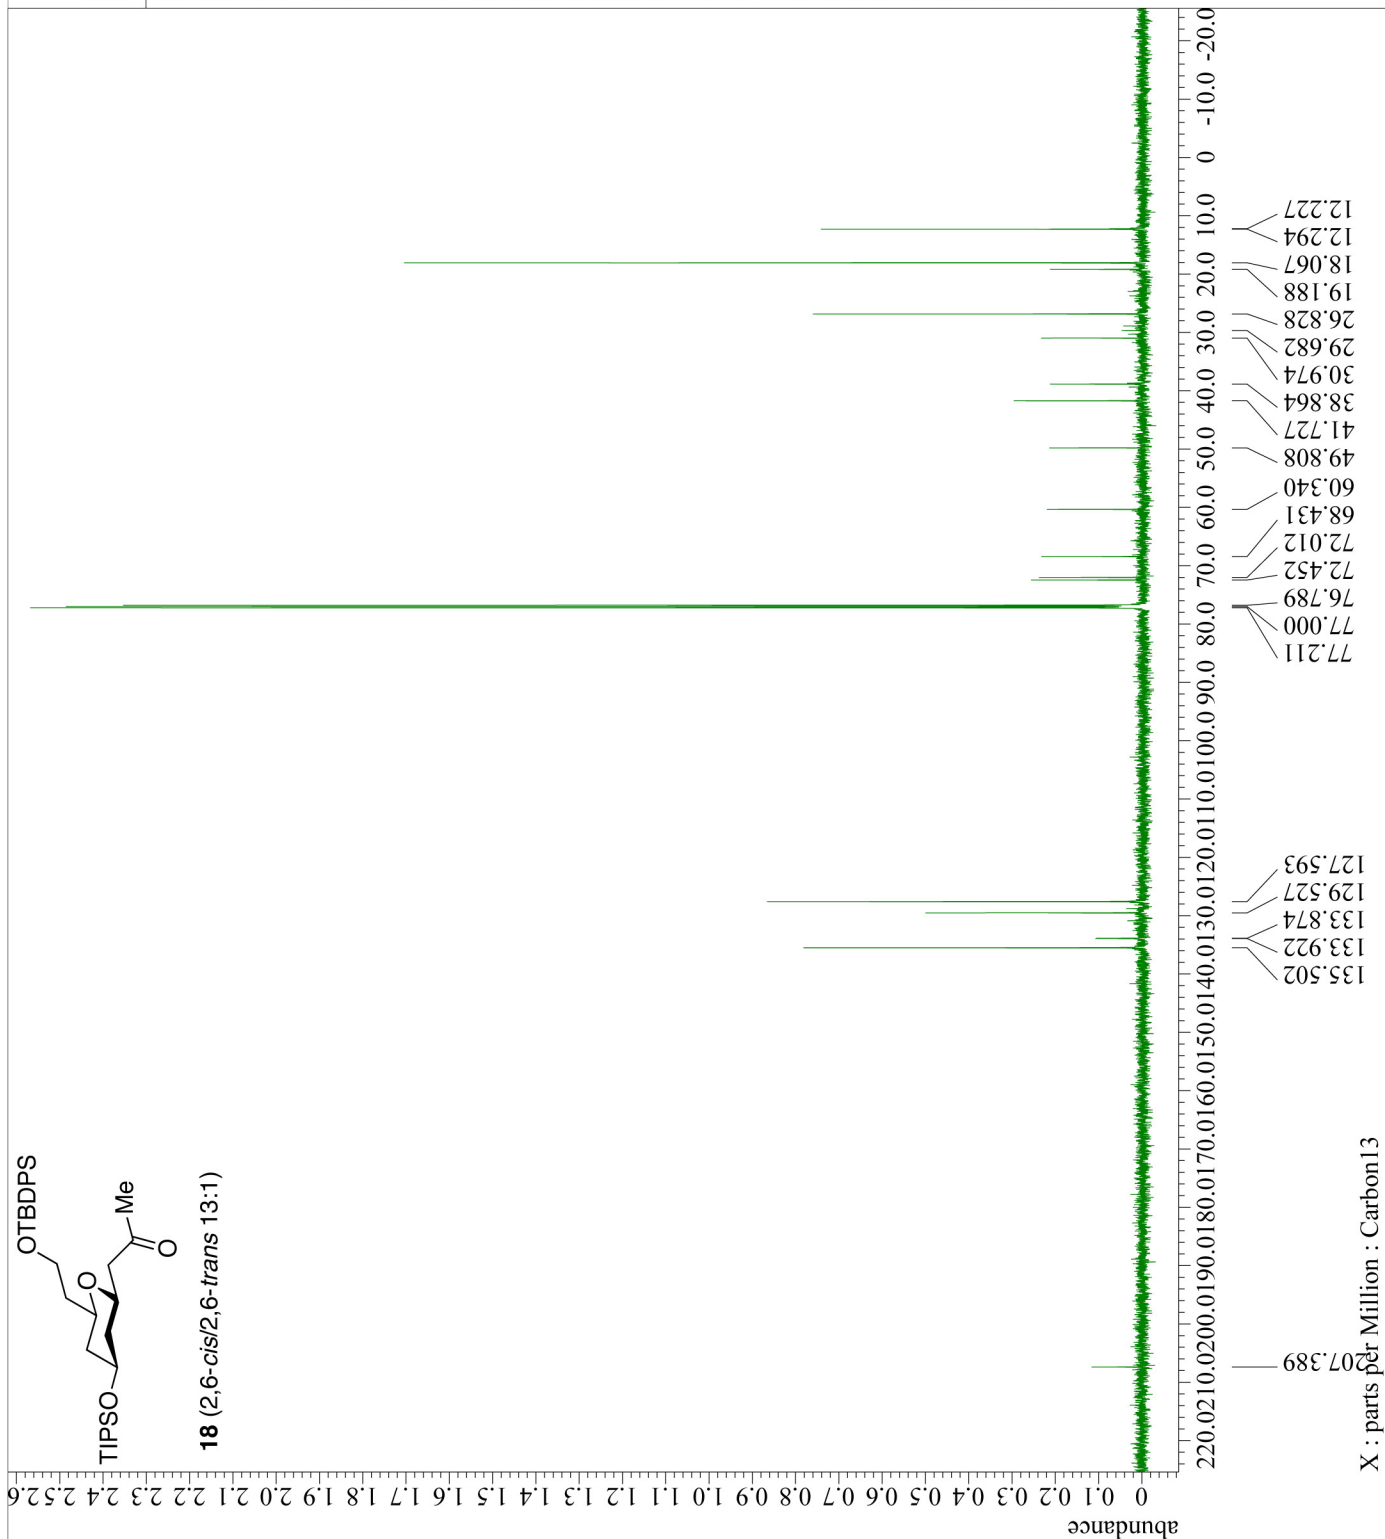

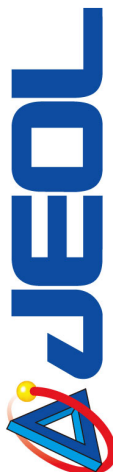

```

File Name      = /Users/HaruhikoFuwa/Docume
Author        = delta
Experiment    = proton.jpg
Sample Id     = TN-I-188c
Solvent       = BENZENE-D6
Creation Time = 14-MAY-2012 10:04:43
Revision Time = 13-JUN-2012 15:48:09
Current_Time  = 13-JUN-2012 15:48:36

Comment       = single pulse
Data Format    = 1D COMPLEX
Dim Size      = 26214
Dim Title     = Proton
Dim Units     = [ppm]
Dimensions    = X
Site          = ECA600
Spectrometer  = DELTA2_NMR

Field Strength = 14.09636928 [T] (600 [MHz])
X_Acq_Duration = 2.18103808 [s]
X_Domain       = 1H
X_Freq         = 600.1723046 [MHz]
X_Offset       = 5 [ppm]
X_Points       = 32768
X_Prescans     = 1
X_Resolution   = 0.45849727 [Hz]
X_Sweep        = 15.02403846 [kHz]
X_Sweep_Clip   = 12.01923077 [kHz]
Irr_Domain     = Proton
Irr_Freq       = 600.1723046 [MHz]
Irr_Offset     = 5 [ppm]
Tri_Domain     = proton
Tri_Freq       = 600.1723046 [MHz]
Tri_Offset     = 5 [ppm]
Clipped        = FALSE
Scans          = 16
Total_Scans    = 16

Relaxation_Delay = 2 [s]
Recvr_Gain       = 44
Temp_Get         = 21 [dC]
X_90_Width      = 12.2 [us]
X_Acq_Time      = 2.18103808 [s]
X_Angle         = 45 [deg]
X_Atn           = 3 [dB]
X_Pulse         = 6.1 [us]
Irr_Mode        = Off
Tri_Mode        = Off
Dante_Presat    = FALSE
Initial_Wait    = 1 [s]
Repetition_Time = 4.18103808 [s]
    
```

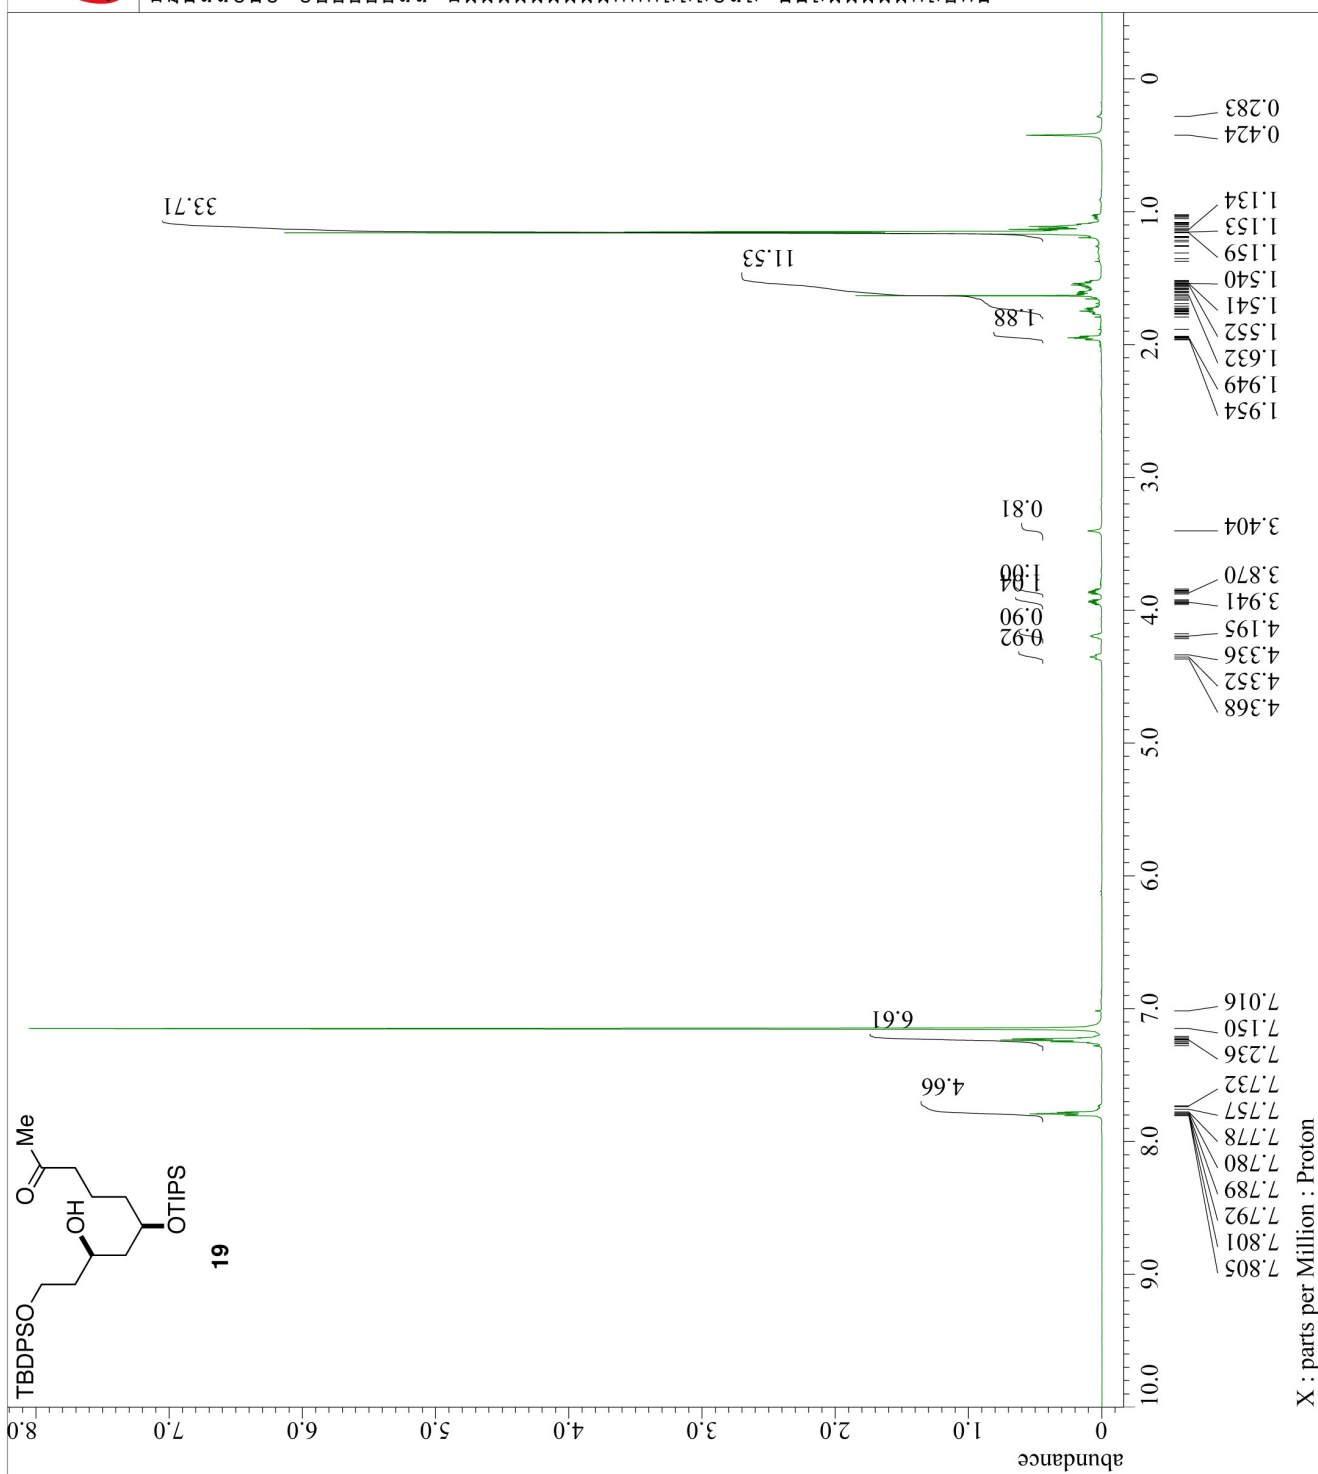





```

File Name      = /Users/HaruhikoFuwa/Docume
Author        = delta
Experiment    = proton.jxp
Sample Id     = TN-I-188b
Solvent       = CHLOROFORM-D
Creation Time = 15-MAY-2012 18:32:44
Revision Time = 13-JUN-2012 15:44:52
Current_Time  = 13-JUN-2012 15:45:22

Comment       = single pulse
Data Format    = 1D COMPLEX
Dim Size      = 26214
Dim Title     = Proton
Dim Units     = [ppm]
Dimensions    = X
Site          = ECA600
Spectrometer  = DELTAZ_NMR

Field Strength = 14.09636928 [T] (600 [MHz])
X_Acq_Duration = 2.18103808 [s]
X_Domain       = 1H
X_Freq         = 600.1723046 [MHz]
X_Offset       = 5 [ppm]
X_Points       = 32768
X_Prescans     = 1
X_Resolution   = 0.45849727 [Hz]
X_Sweep        = 15.02403846 [kHz]
X_Sweep_Clip   = 12.01923077 [kHz]
Irr_Domain     = Proton
Irr_Freq       = 600.1723046 [MHz]
Irr_Offset     = 5 [ppm]
Tri_Domain     = proton
Tri_Freq       = 600.1723046 [MHz]
Tri_Offset     = 5 [ppm]
Clipped        = FALSE
Scans          = 64
Total_Scans    = 64

Relaxation_Delay = 2 [s]
Recvr_Gain       = 46
Temp_Get         = 21.6 [dC]
X_90_Width      = 12.2 [us]
X_Acq_Time      = 2.18103808 [s]
X_Angle         = 45 [deg]
X_Atn           = 3 [dB]
X_Pulse         = 6.1 [us]
Irr_Mode        = Off
Tri_Mode        = Off
Dante_Presat    = FALSE
Initial_Wait    = 1 [s]
Repetition_Time = 4.18103808 [s]
    
```

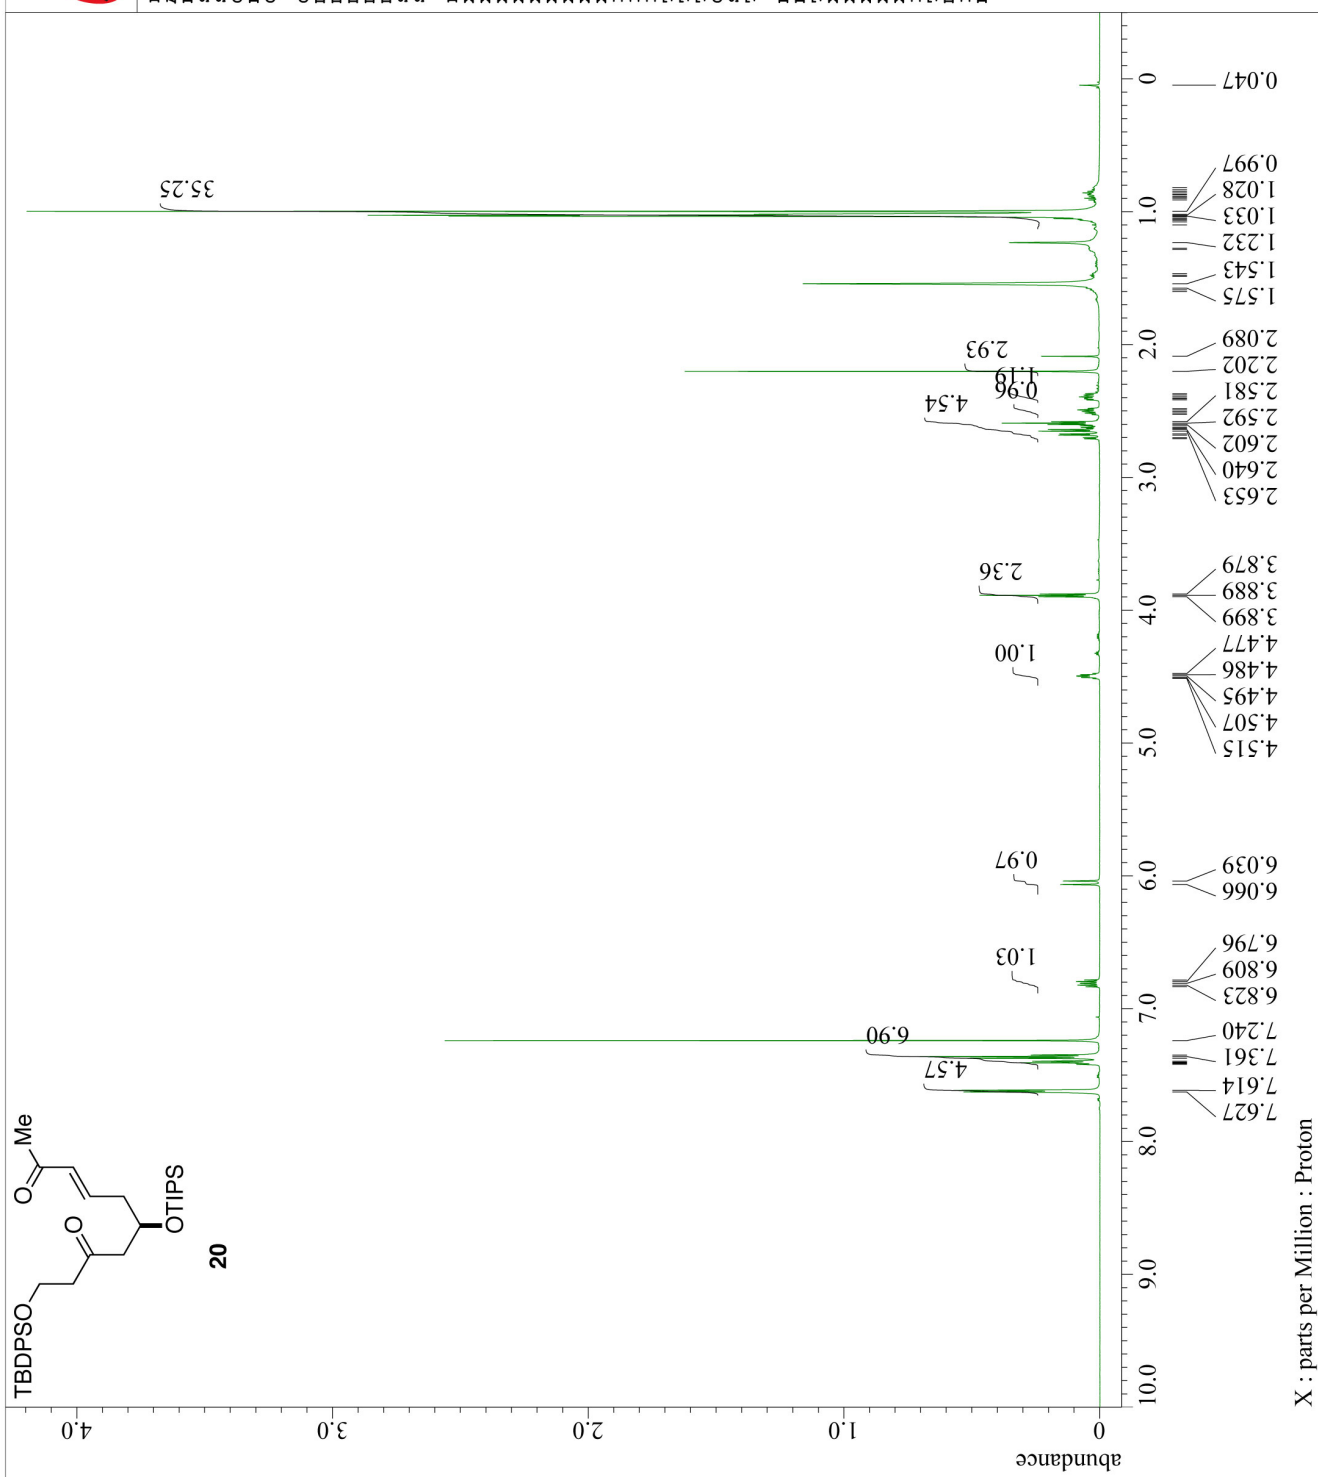

X : parts per Million : Proton





```

File Name      = /Users/HaruhikoFuwa/Docume
Author        = delta
Experiment    = carbon.jxp
Sample Id     = TN-I-188b
Solvent       = CHLOROFORM-D
Creation Time = 15-MAY-2012 23:05:50
Revision Time = 13-JUN-2012 15:46:03
Current_Time  = 13-JUN-2012 15:46:21

Comment       = single pulse decoupled gat
Data Format    = 1D COMPLEX
Dim_Sizes     = 26214
Dim_Title     = Carbon13
Dim_Units     = [ppm]
Dimensions    = X
Site          = ECA600
Spectrometer  = DELTAZ_NMR

Field Strength = 14.09636928 [T] (600 [MHz])
X_Acq_Duration = 0.69206016 [s]
X_Domain       = 13C
X_Freq         = 150.91343039 [MHz]
X_Offset       = 100 [ppm]
X_Points       = 32768
X_Prescans     = 4
X_Resolution   = 1.44496109 [Hz]
X_Sweep        = 47.34848485 [kHz]
X_Sweep_Clip   = 37.87878788 [kHz]
Irr_Domain     = Proton
Irr_Freq       = 600.1723046 [MHz]
Irr_Offset     = 5 [ppm]
Clipped        = TRUE
Scans          = 13880.0
Total_Scans    = 13880.0

Relaxation_Delay = 2 [s]
Recvr_Gain       = 54
Temp_Get         = 22.6 [dC]
X_90_Width      = 9 [us]
X_Acq_Time      = 0.69206016 [s]
X_Angle         = 30 [deg]
X_Atn           = 8 [dB]
X_Pulse         = 3 [us]
Irr_Atn_Dec     = 18 [dB]
Irr_Atn_Noise  = 18 [dB]
Irr_Noise      = WALTZ
Irr_Fwidth     = 76 [us]
Decoupling      = TRUE
Initial_Wait    = 1 [s]
Noe_Time        = TRUE
Repetition_Time = 2 [s]
    
```

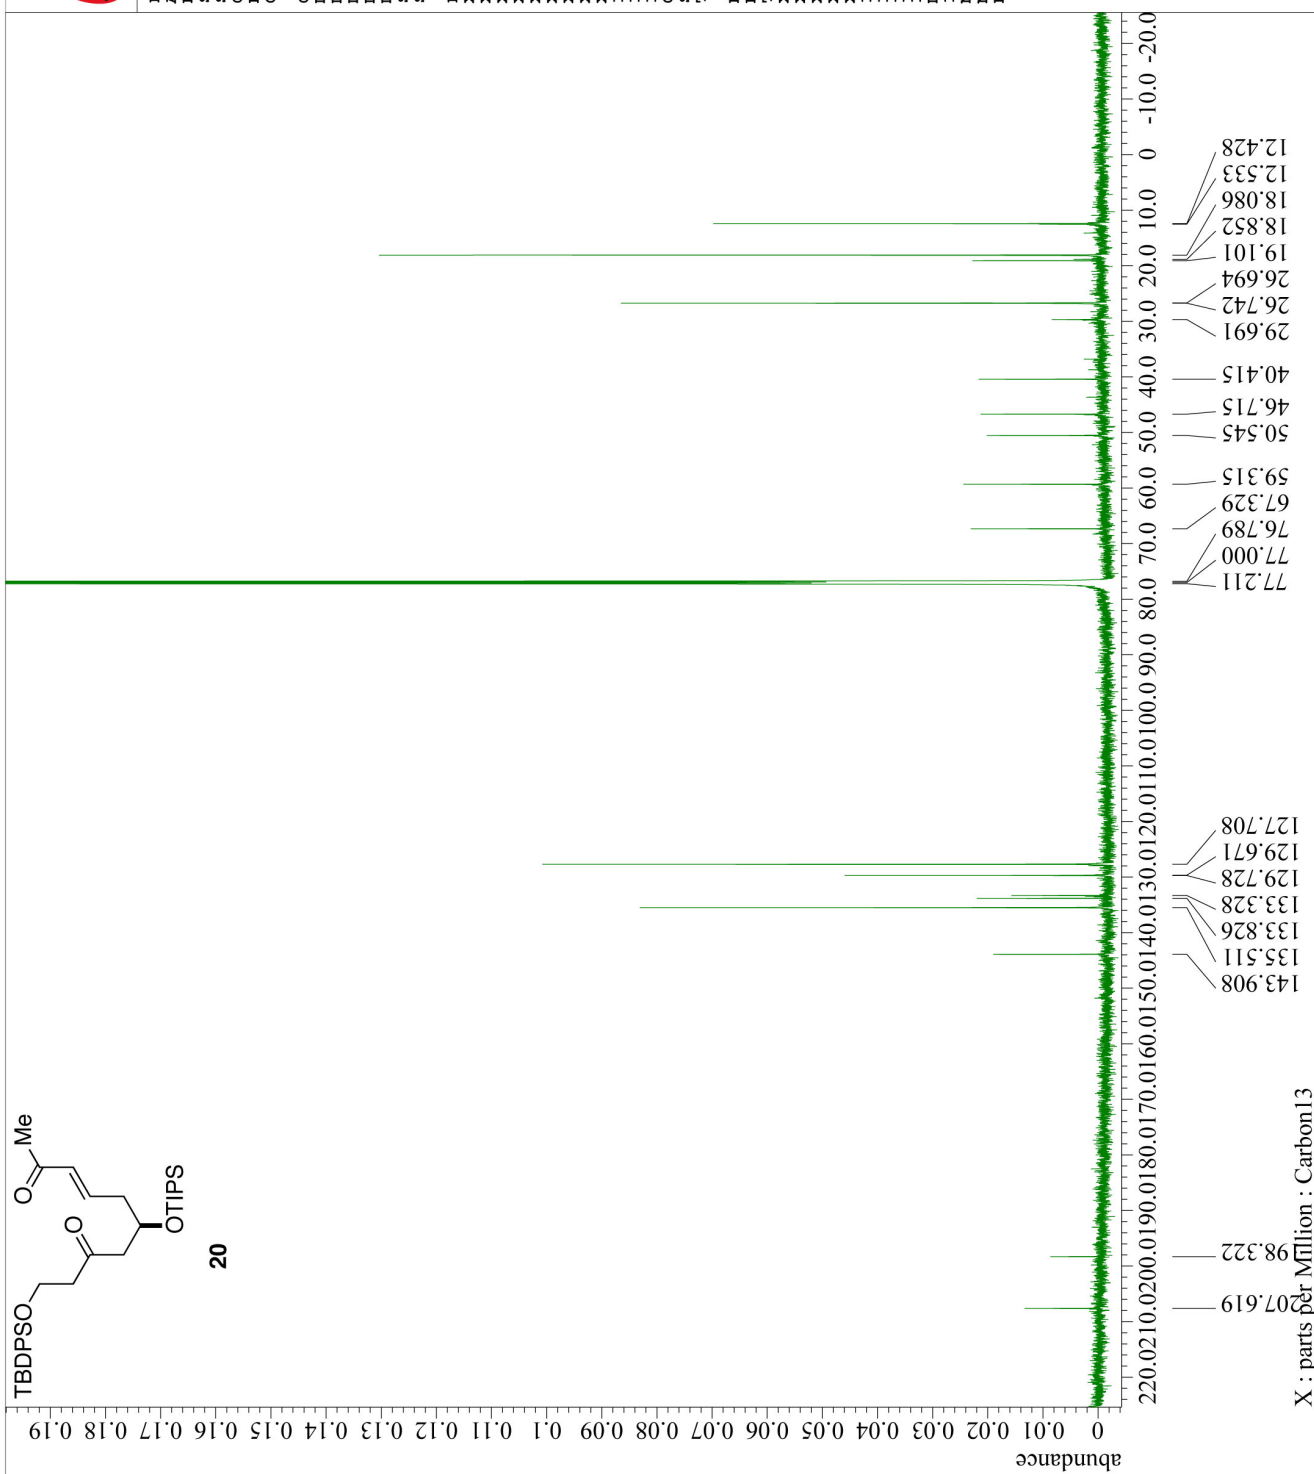

X : parts per Million : Carbon13
